# Supplementary material for: Repeat-Induced Point Mutations (RIP) Drives the Formation of Distinct Sub-Genomic Compartments in Fusarium Circinatum
Source: Preprints.org preprint supplement (doi:10.20944/preprints202012.0697.v1), 2020-12-28

- **Figure S5:** Changes in nucleotide frequencies per GC content range. These analyses were done using OcculterCut v. 2.1 [2] on the genome sequences investigated in this study. A) Scatterplot illustrating changes in tri-nucleotide frequencies for the four different %GC content ranges. B) Scatterplot illustrating changes in di-nucleotide frequencies for the four different %GC content ranges. C) Histogram showing changes in mono-nucleotide frequencies for the three different %GC content ranges. D) Pie chart showing the proportion of the genome characterized by each %GC content range.

A

## UG27

B

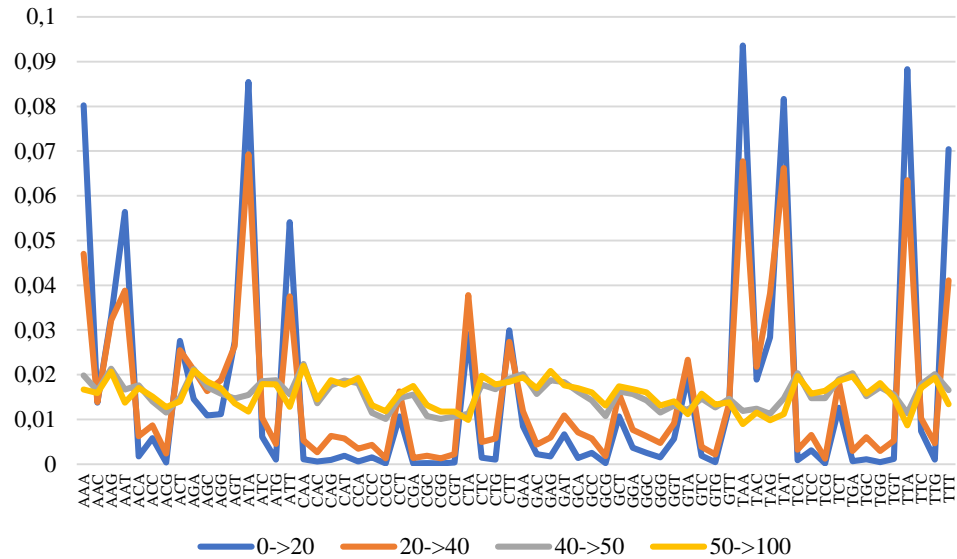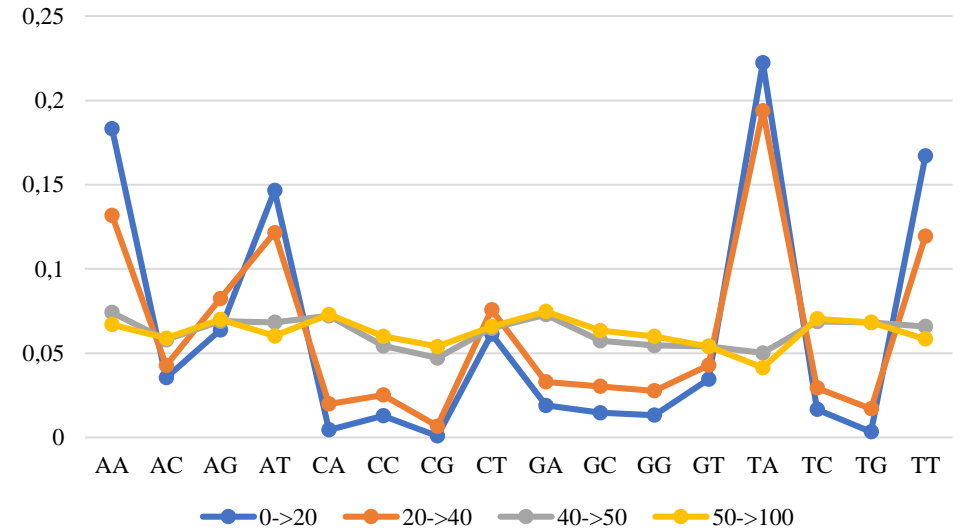

C

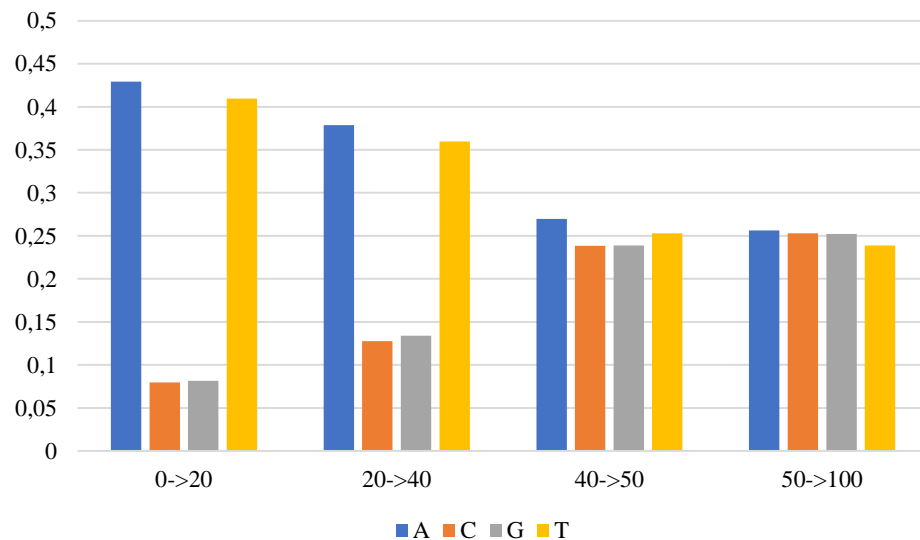

D

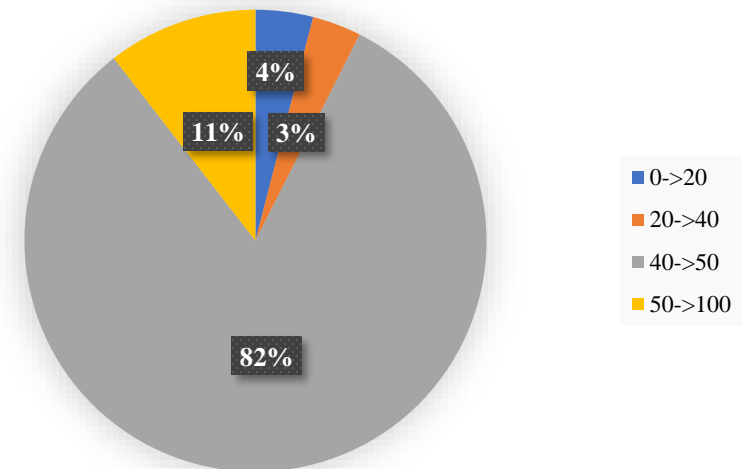

A

FSP34

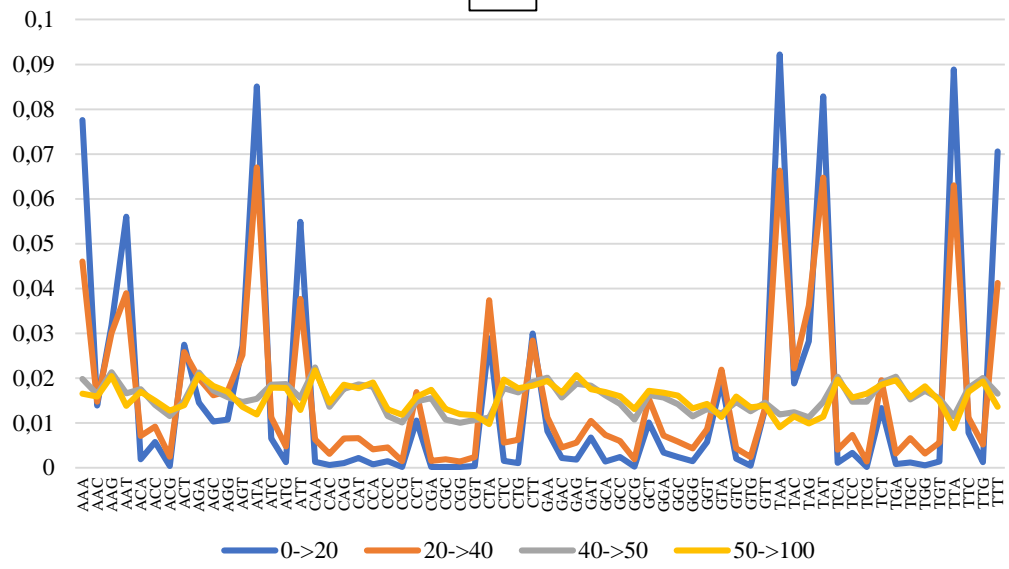

B

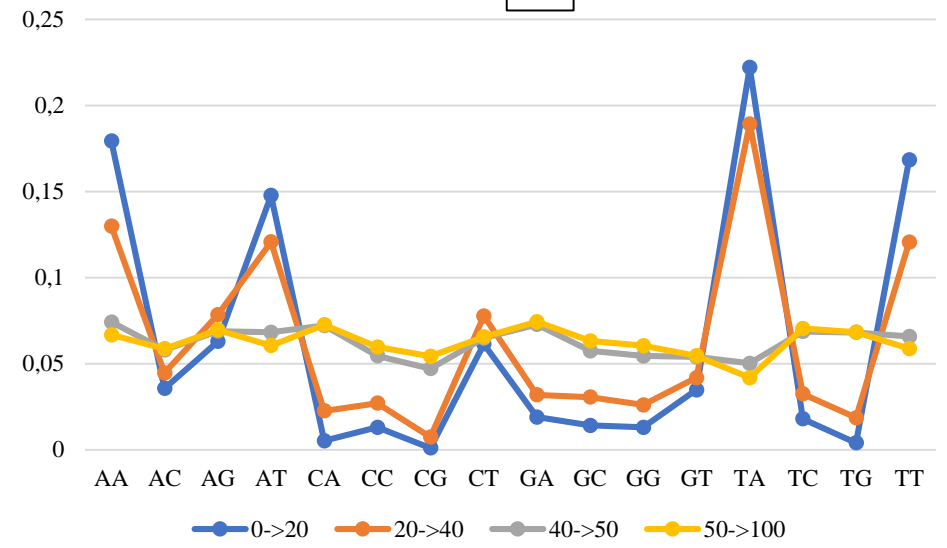

C

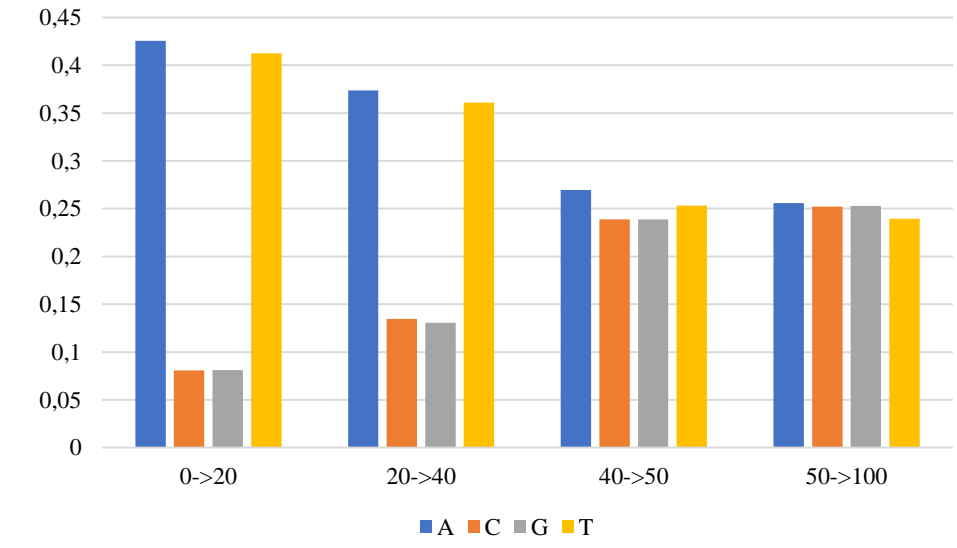

D

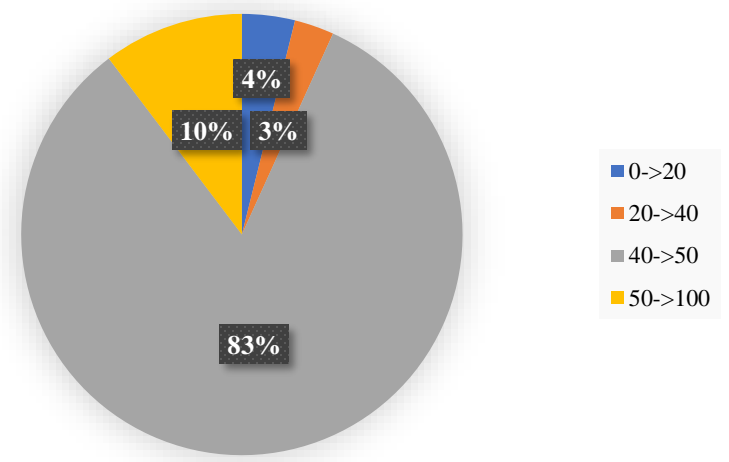

A

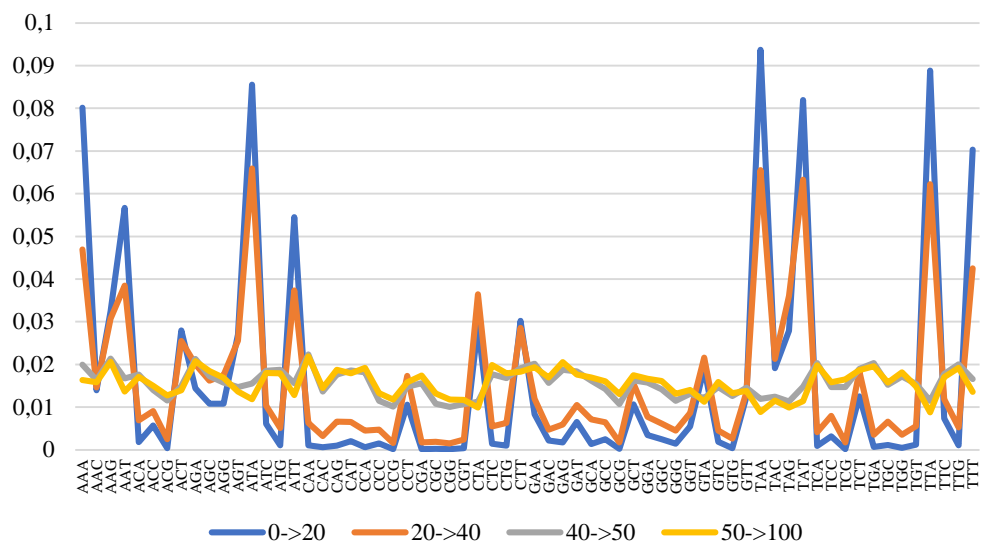

B

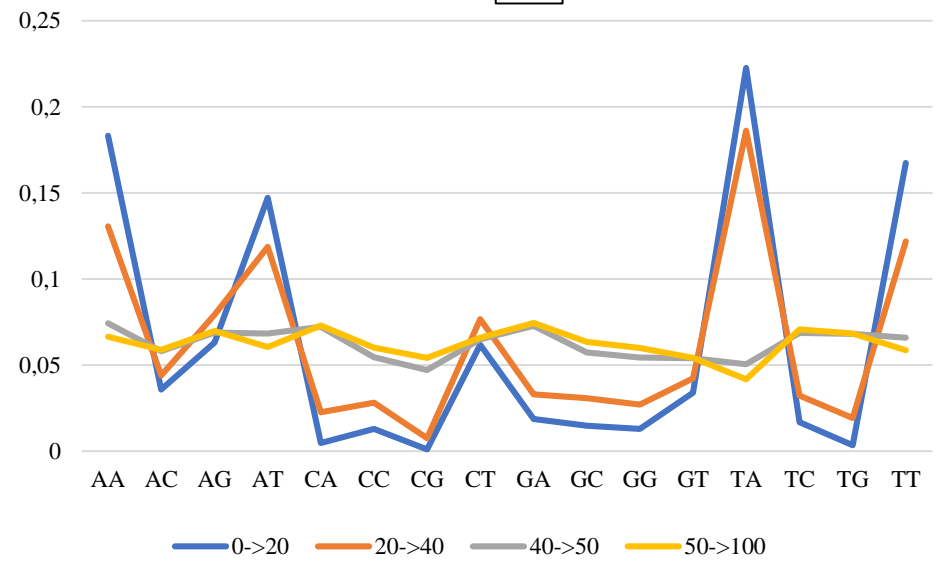

C

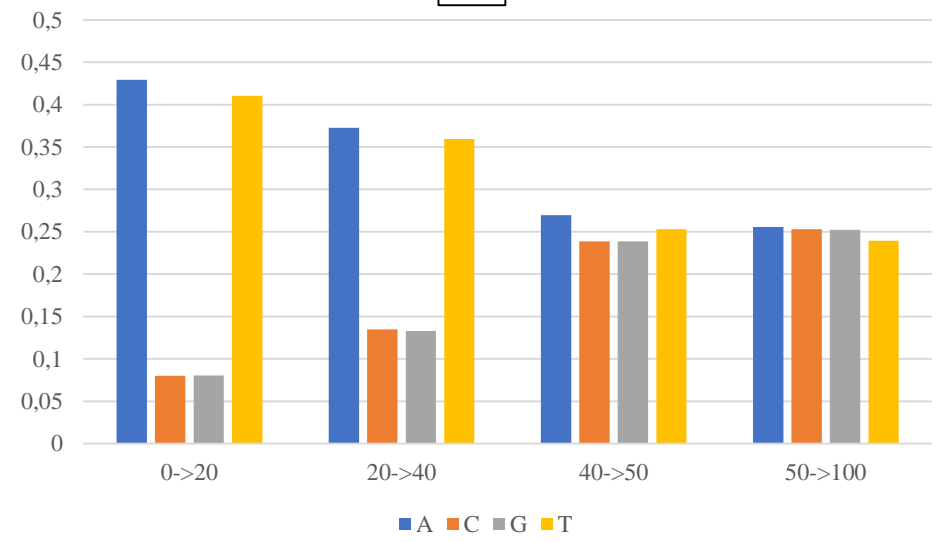

D

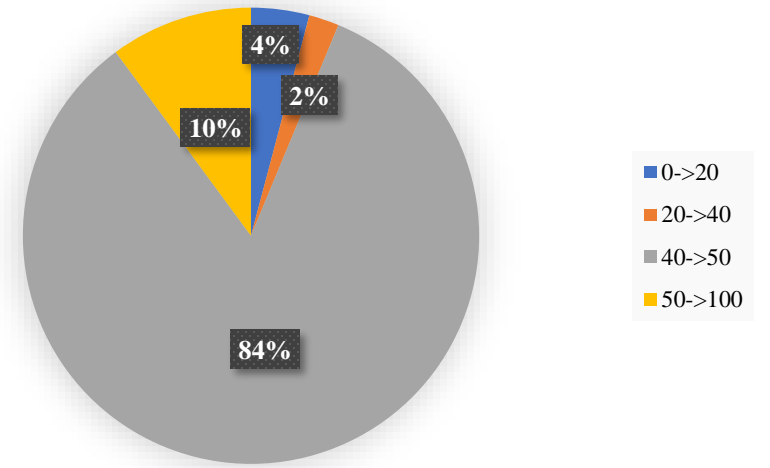



A

CMWF567

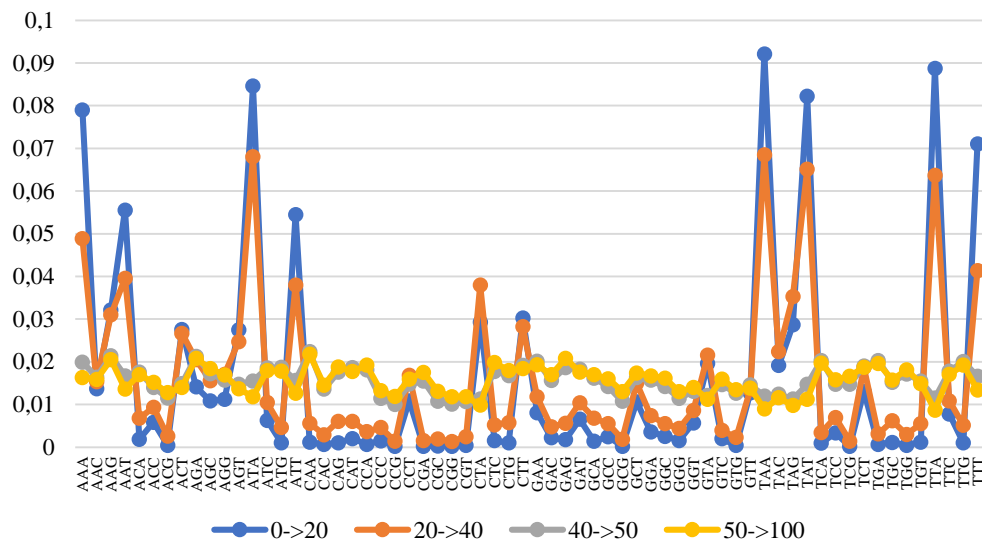

B

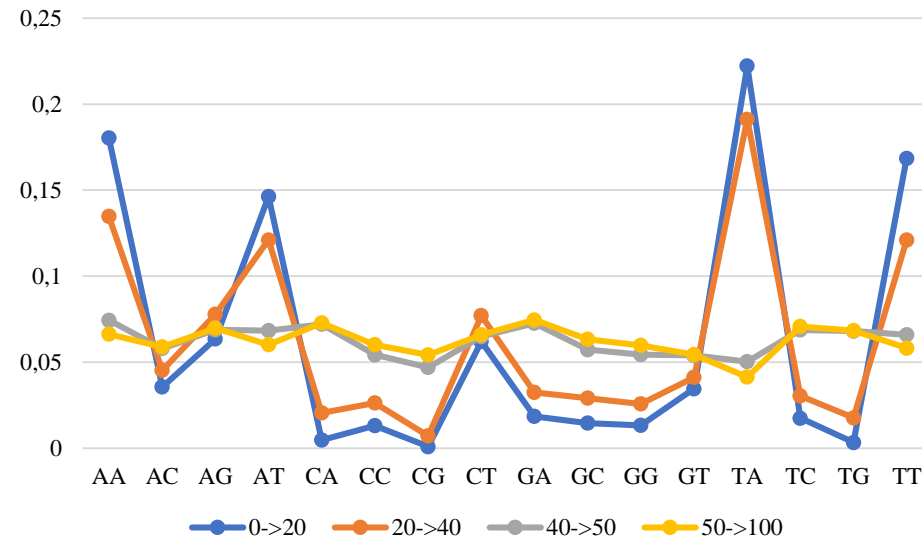

C

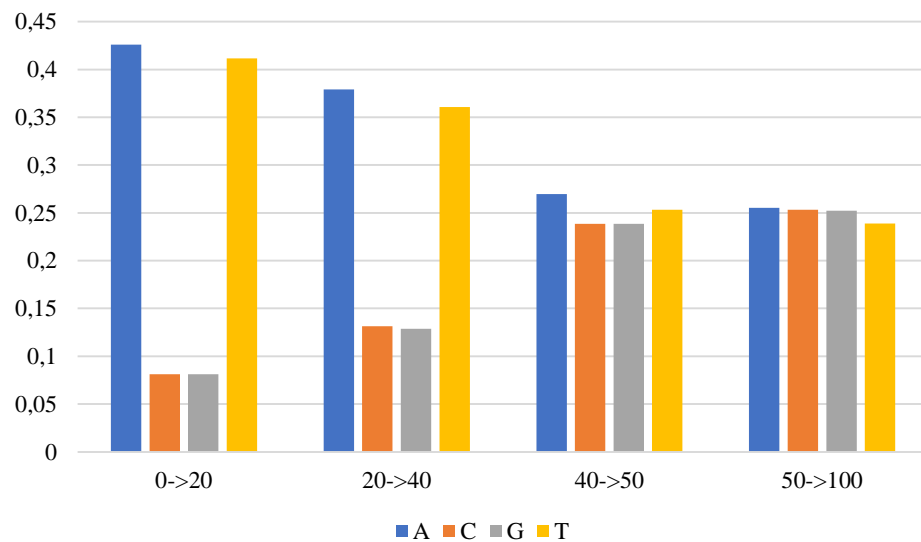

D

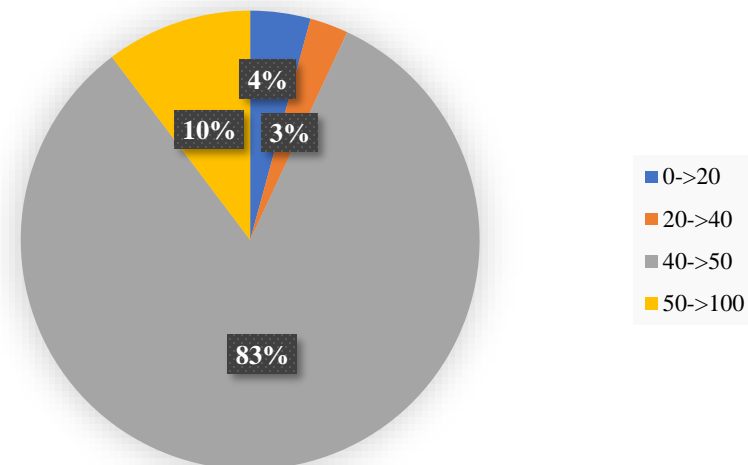

Supplement: Supplementary file 6 [file supplementary]
