# Supplementary material for: Repeat-Induced Point Mutations (RIP) Drives the Formation of Distinct Sub-Genomic Compartments in Fusarium Circinatum
Source: Preprints.org preprint supplement (doi:10.20944/preprints202012.0697.v1), 2020-12-28

**Figure S2: RIP analyses of effector gene dataset:** Line graphs depicting the changes in RIP index values (y-axis) across the length of the gene sequences (Table S4). Changes in RIP composite index value (red), RIP substrate index values (yellow) and RIP product index values (green) are indicated. RIP composite values above 0 indicate RIP. RIP substrate index values above 1.1 and RIP substrate index values below 0.75 are suggestive of RIP. The results for each effector gene set are illustrated in Figure S2A to Figure S2E, for FSP34, FSOR, FFRA, CMWF567, and UG27, respectively.

A

FSP34

FCIRG\_06237

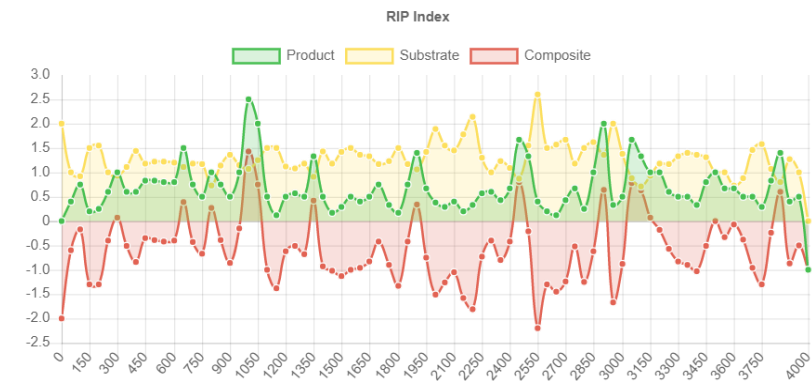

FCIRG\_07540

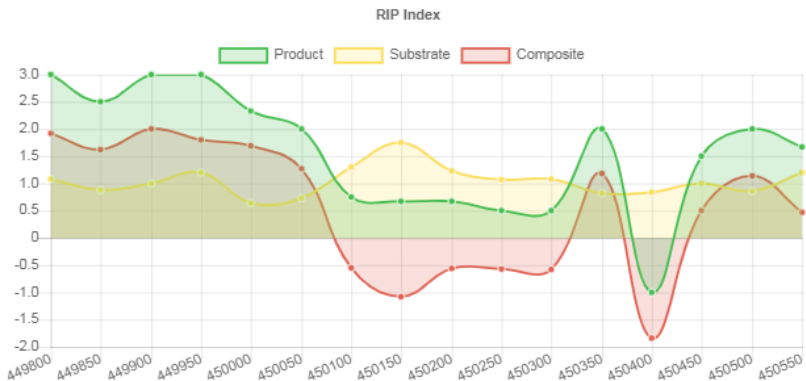

FCIRG\_04266

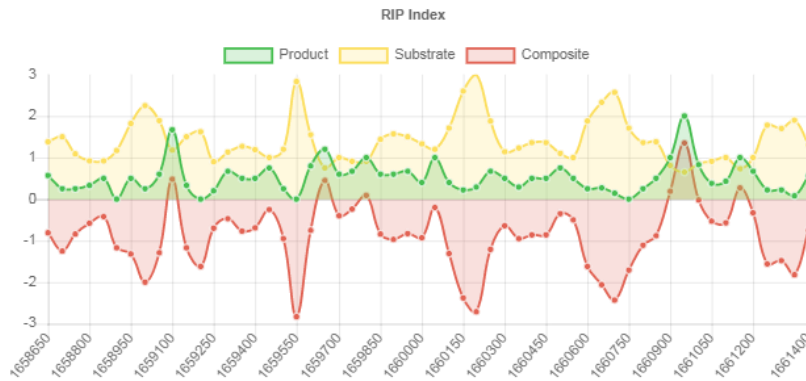

FCIRG\_08174

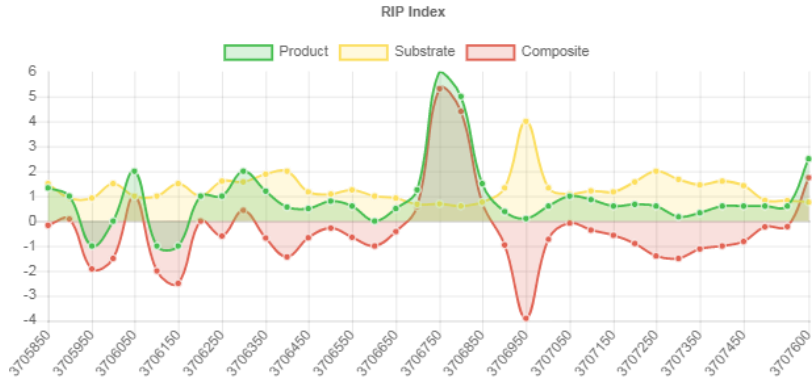

FCIRG\_02294

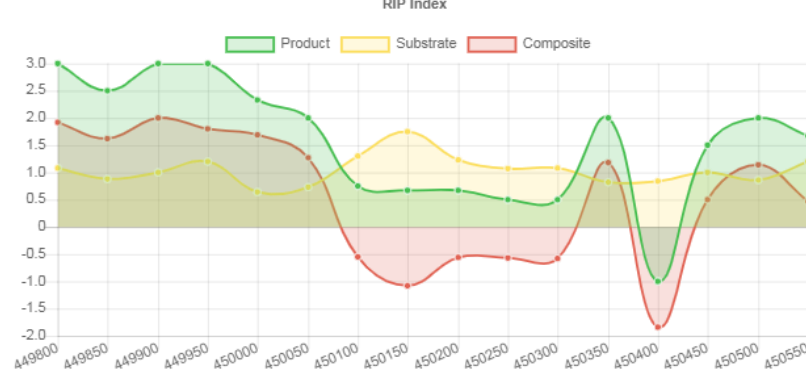

FCIRG\_10713

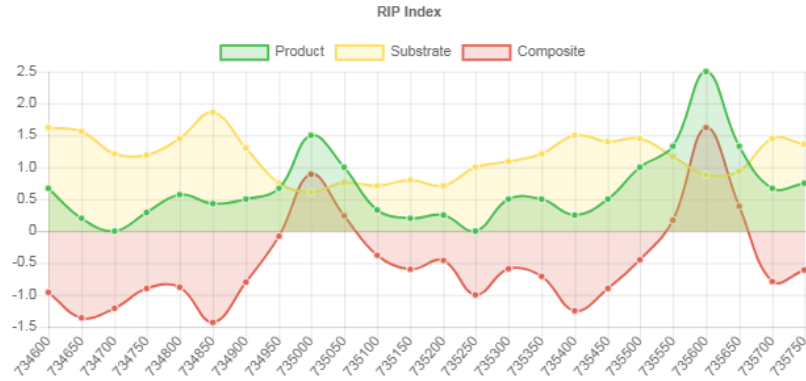

FCIRG\_08753

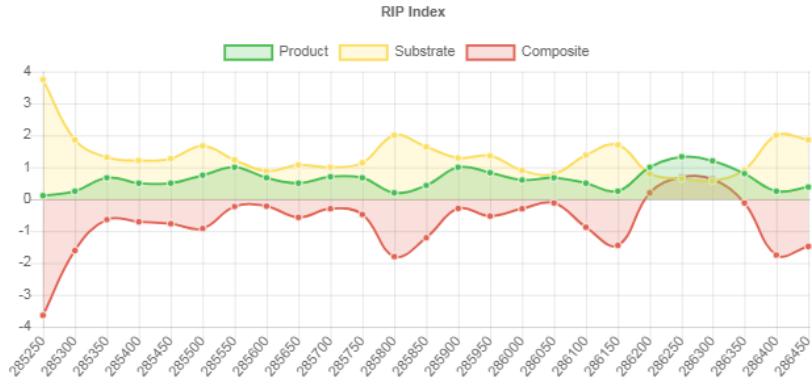

FCIRG\_07147

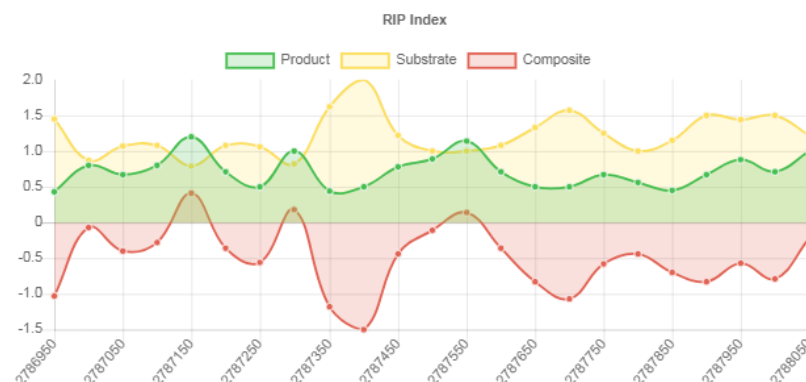

FCIRG\_10839

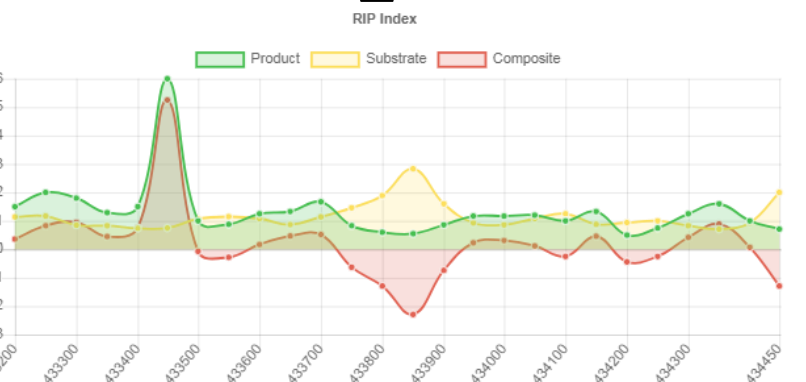

FCIRG\_01677

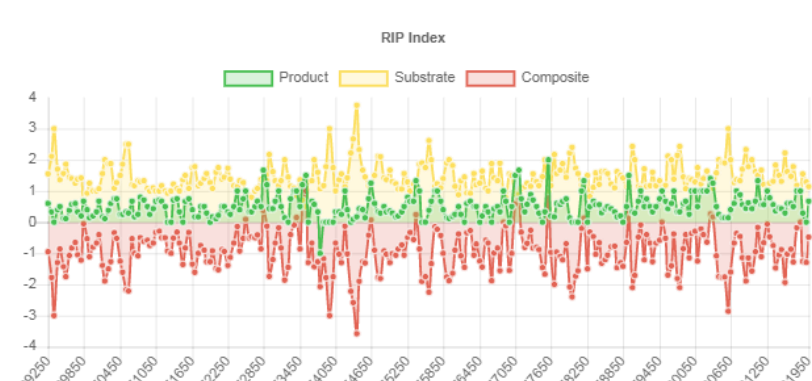

FCIRG\_03031

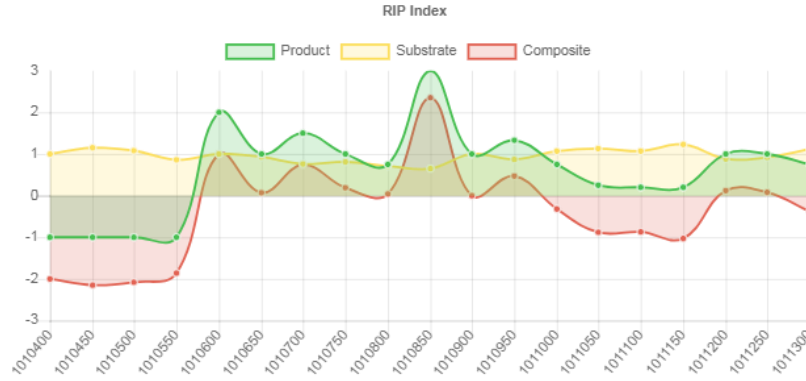

FCIRG\_12048

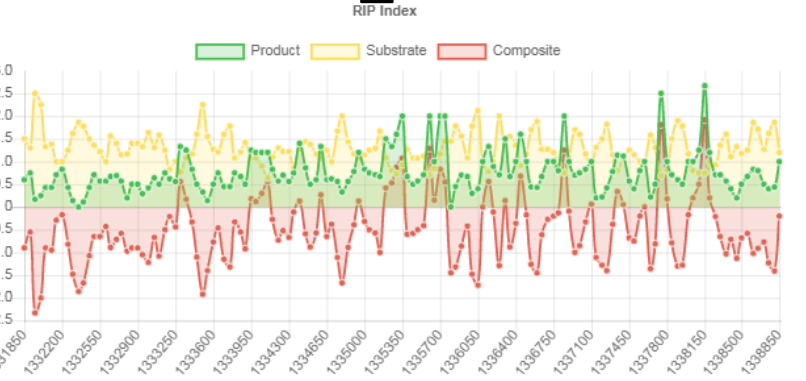

B

FSOR

g3.48

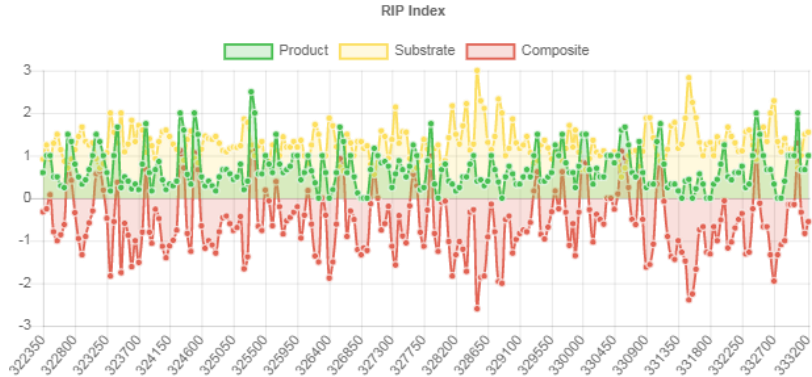

g15.61

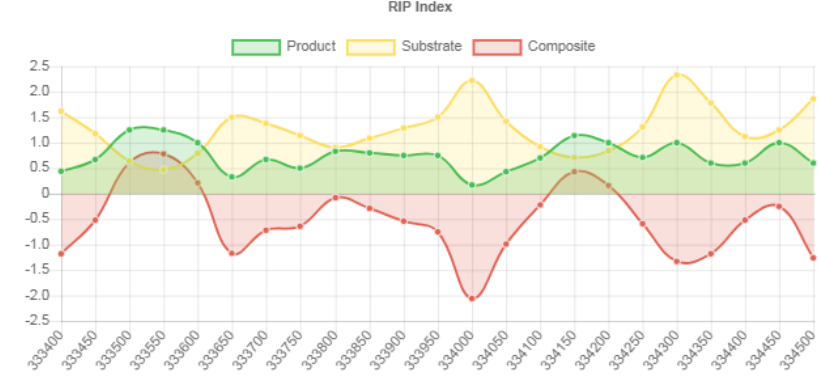

g39.61

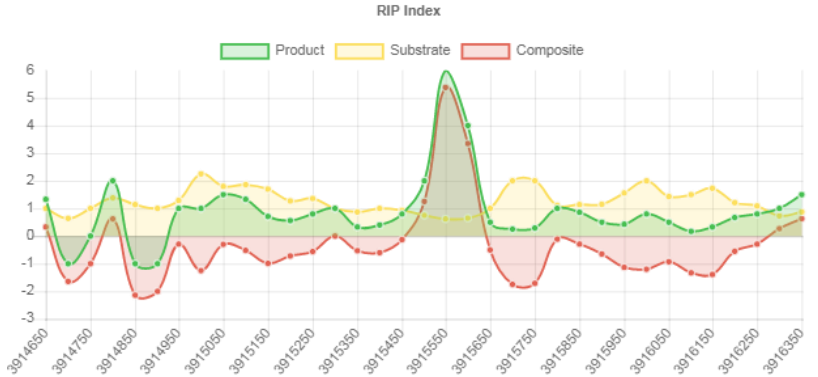

g31.74

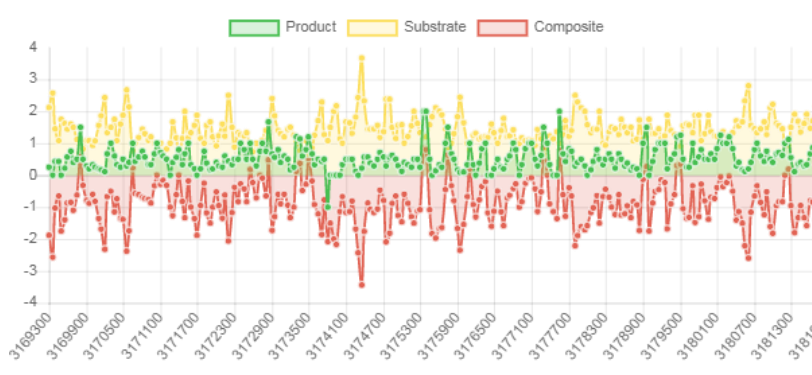

g16.33

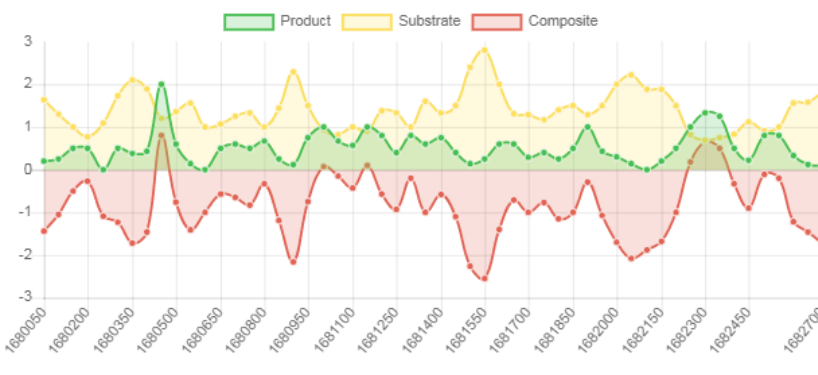

g2.102

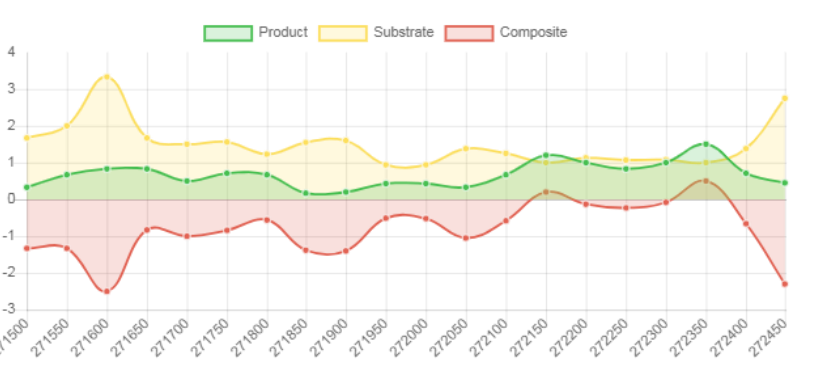

g26.94

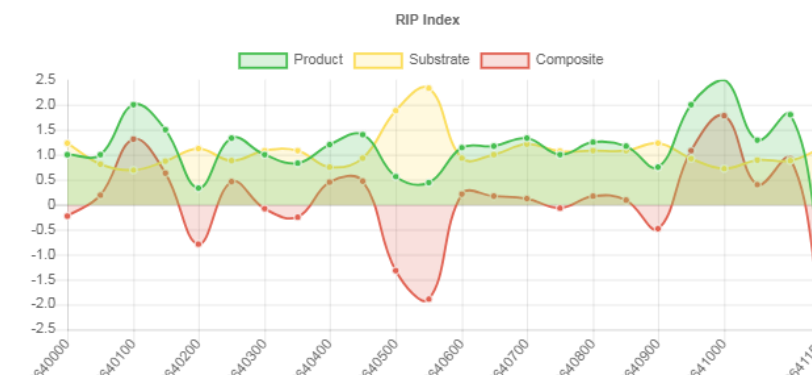

g10.52

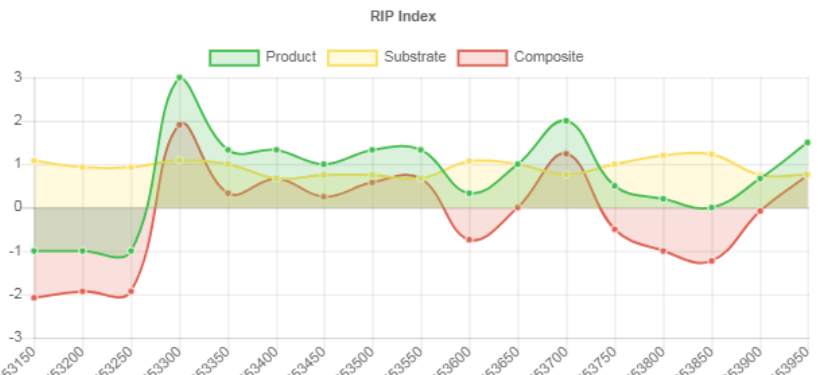

g7.37

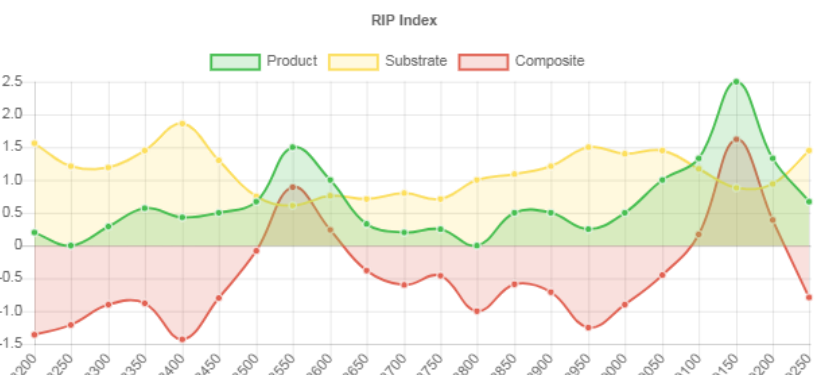

g15.66

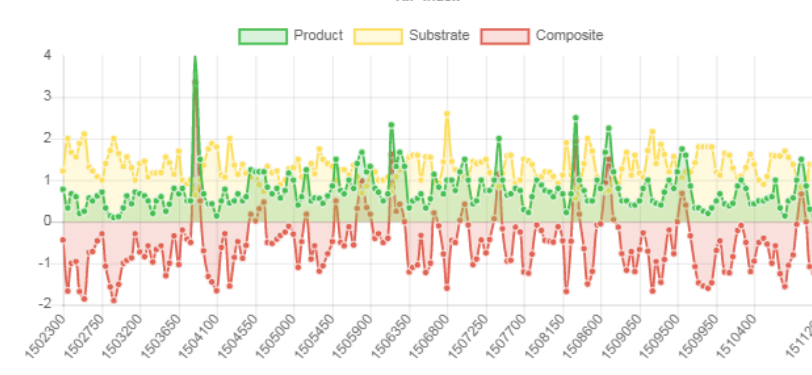

g3.81

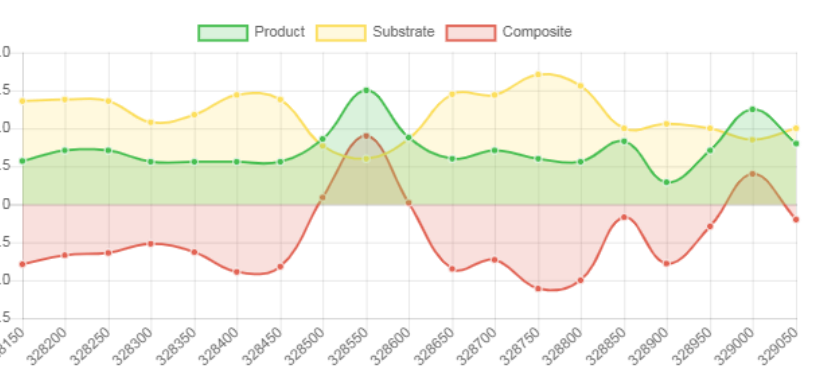

g5.67

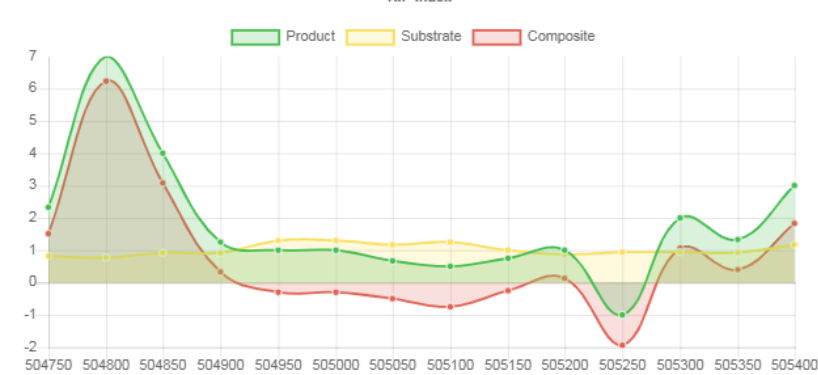



C

FFRA

g3.39

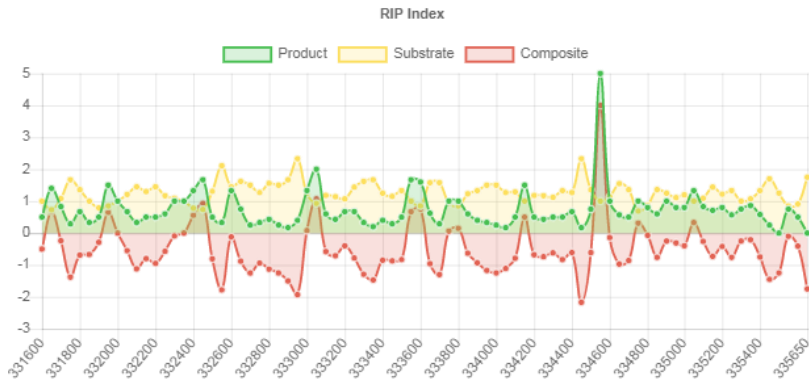

g3.101

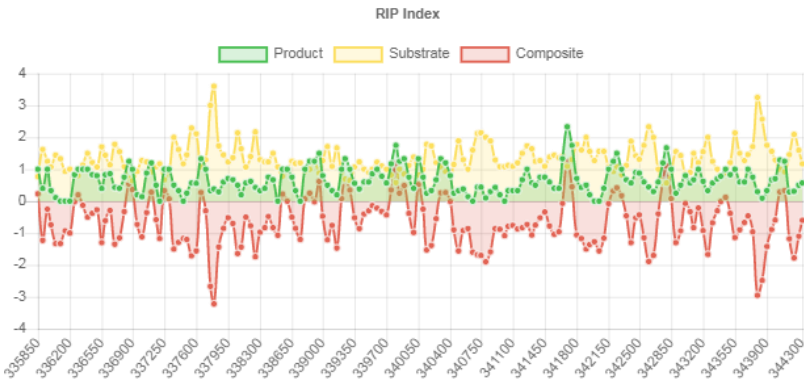

g40.53

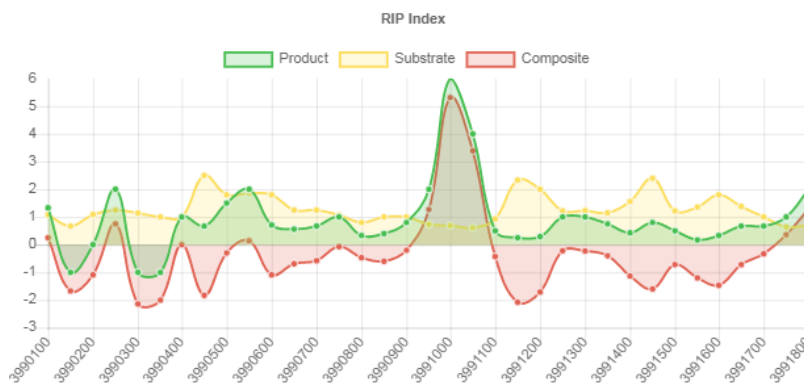

g7.1

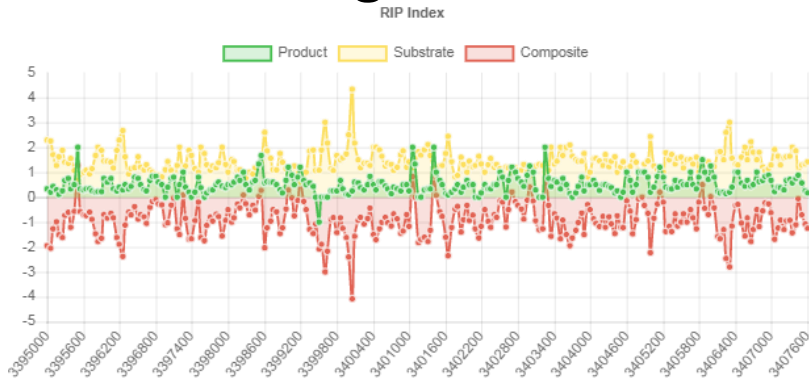

g34.10

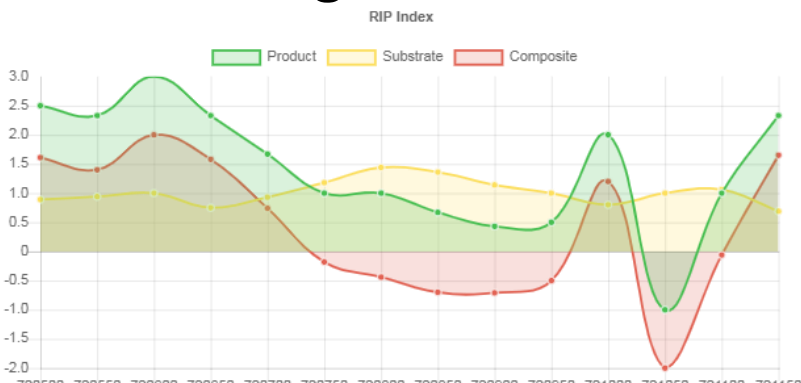

g16.48

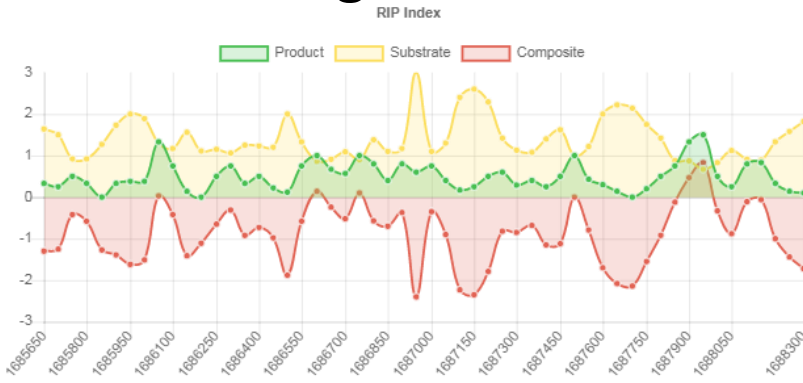

g2.138

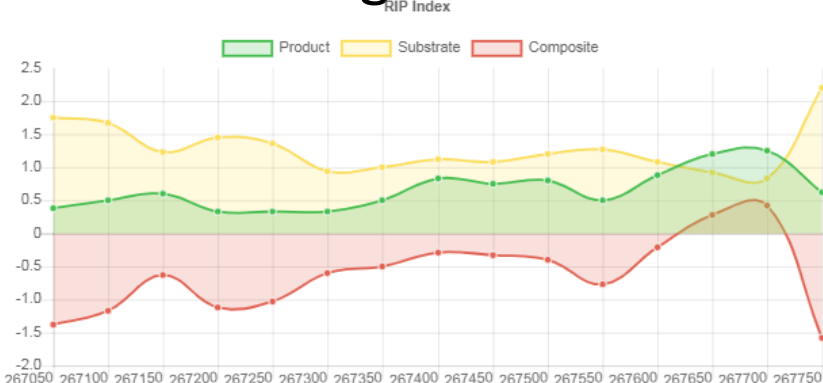

g32.15

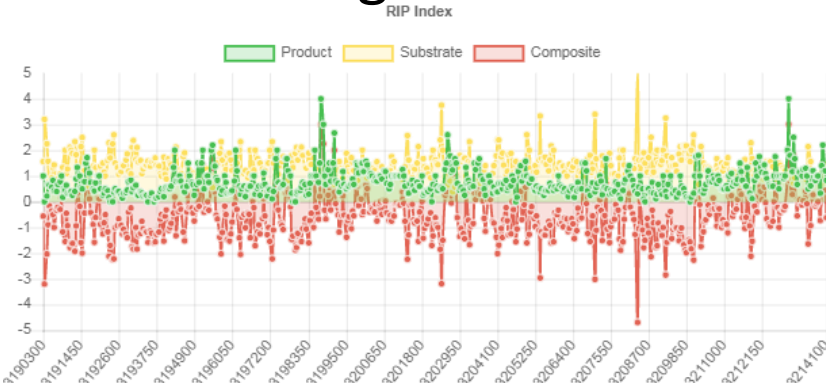

g10.58

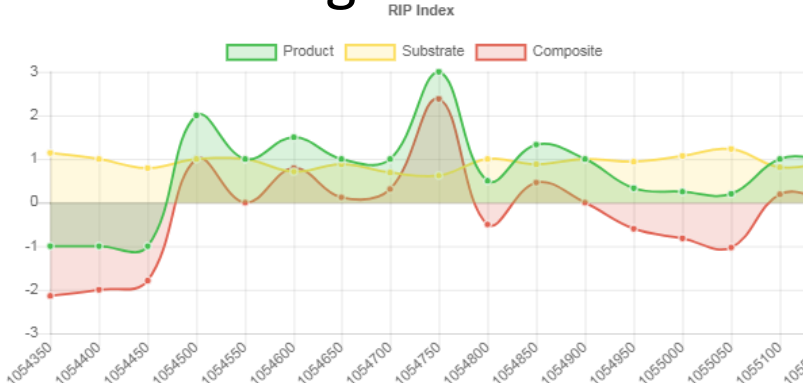

g7.17

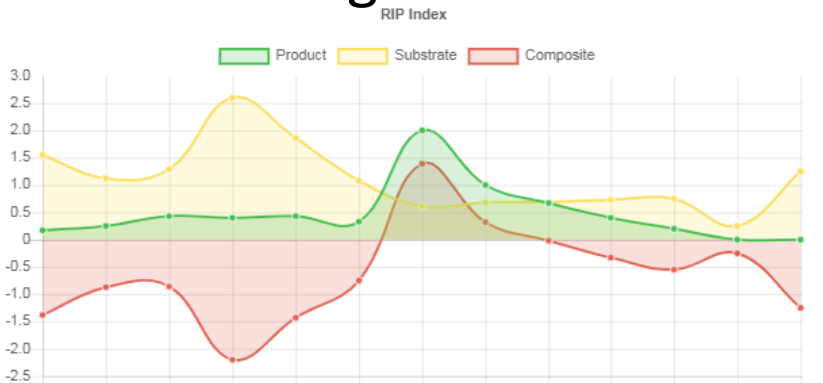

g2.35

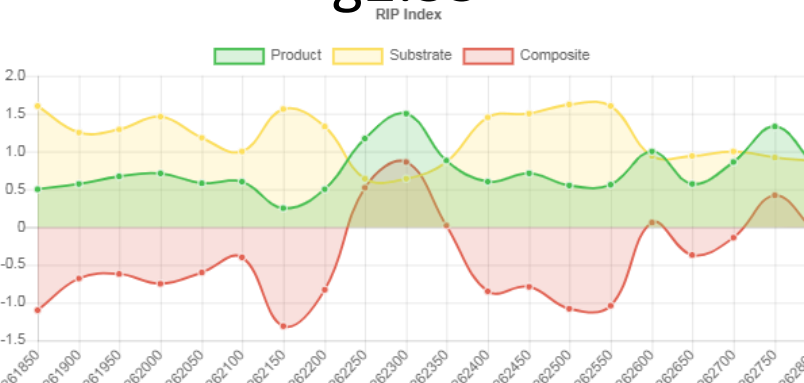

g32.15

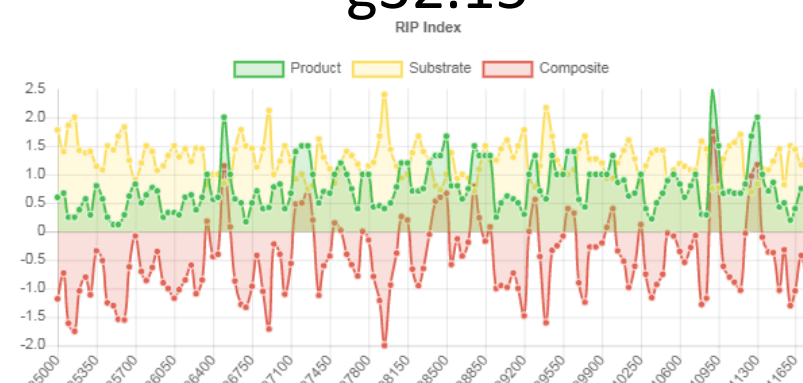

D

g3752

RIP Index

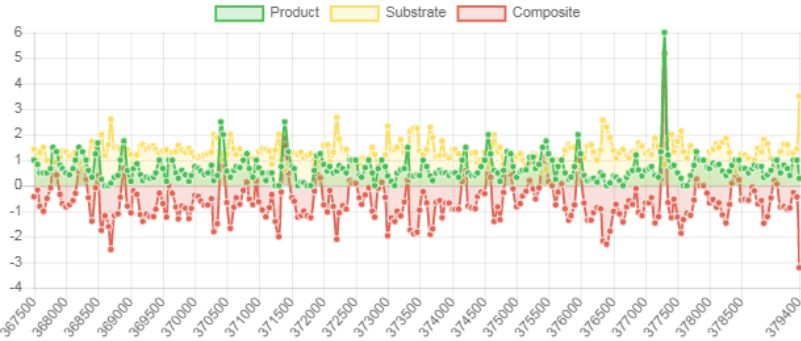

CMWF567

RIP Index

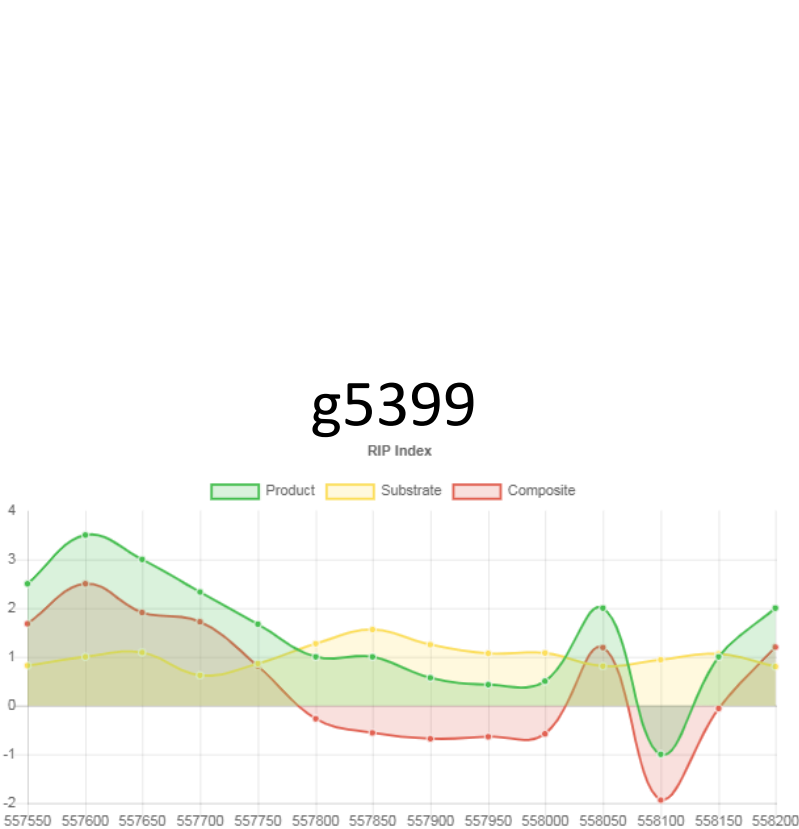

g4841

RIP Index

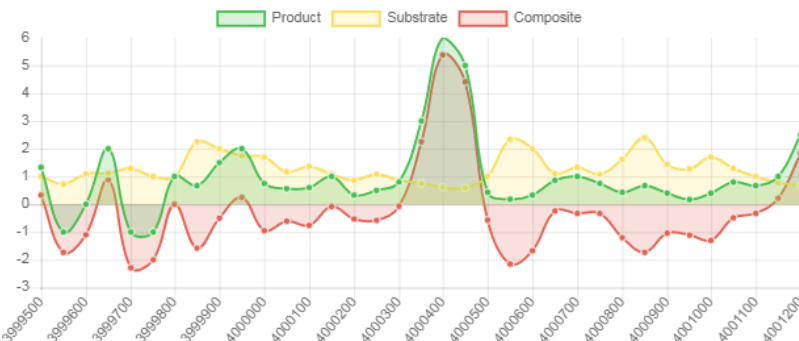

g6319

RIP Index

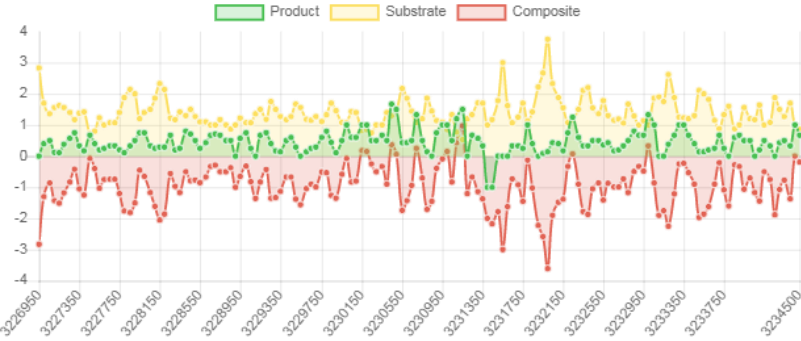

g5399

RIP Index

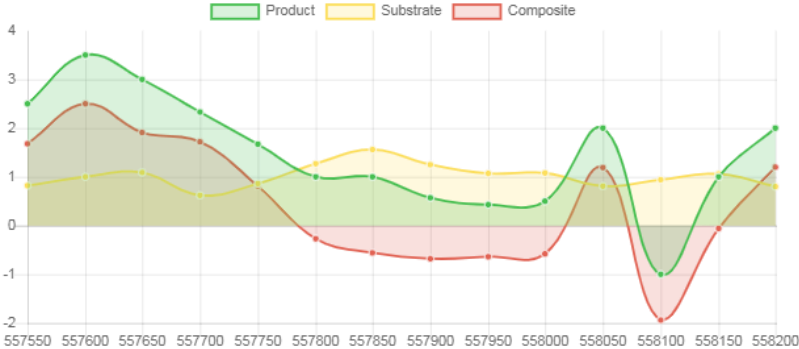

g10094

RIP Index

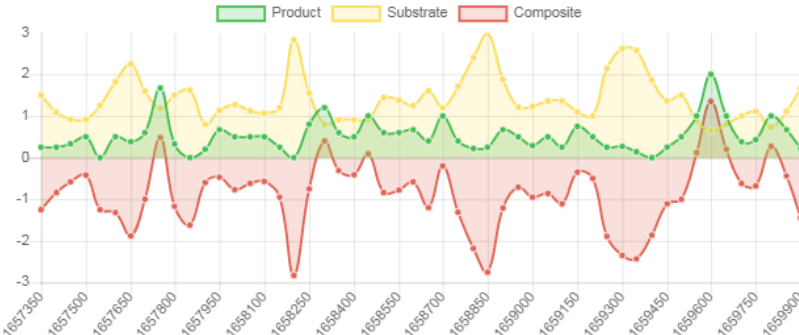

g10756

RIP Index

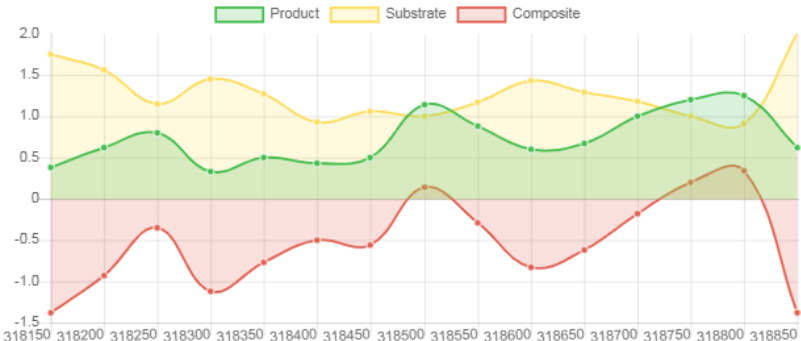

g11702

RIP Index

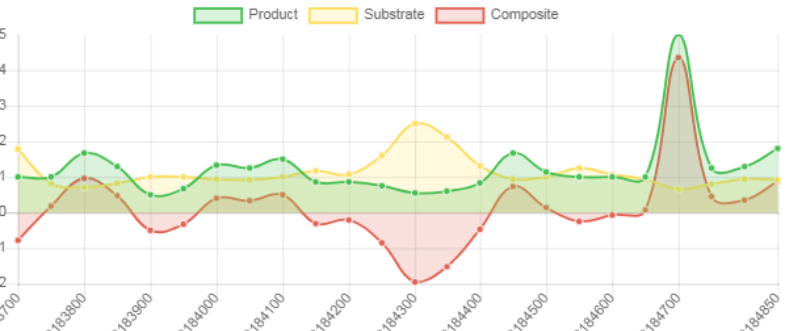

g13259

RIP Index

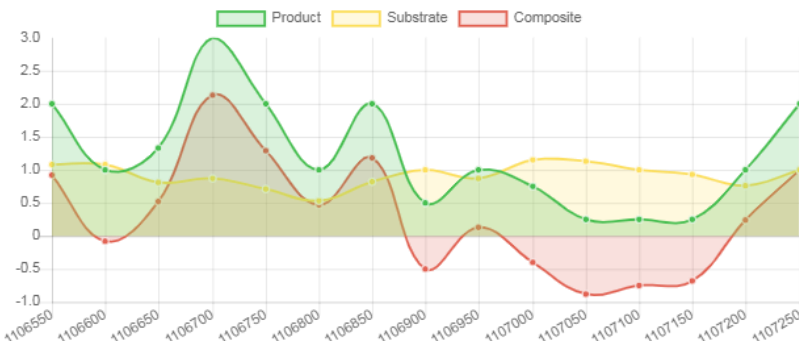

g13145

RIP Index

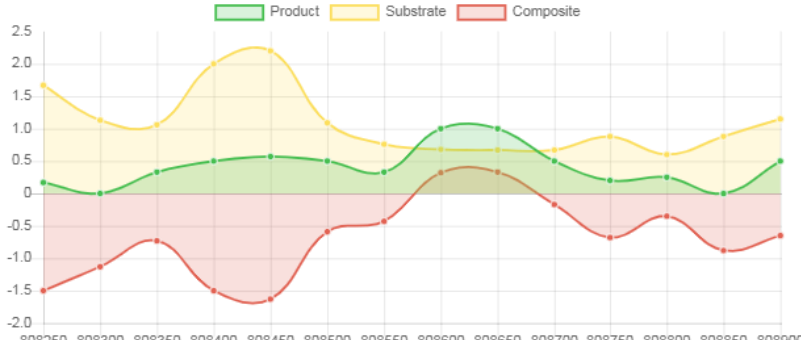

g13924

RIP Index

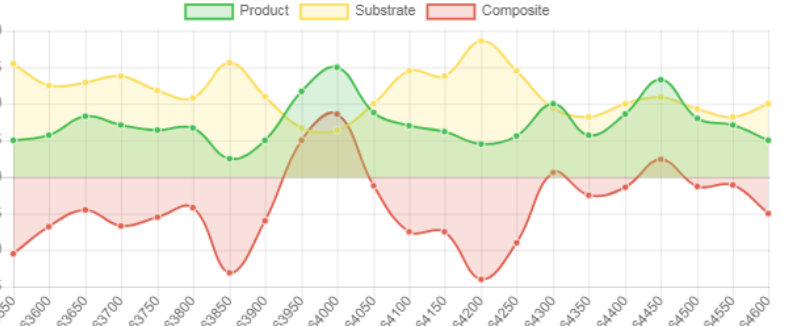

g14338

RIP Index

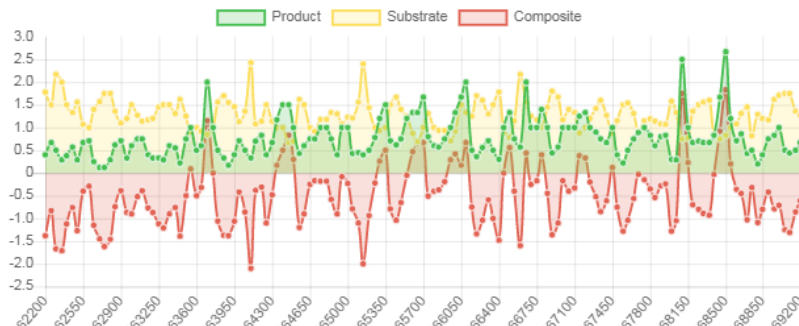

E

UG27

g5.63

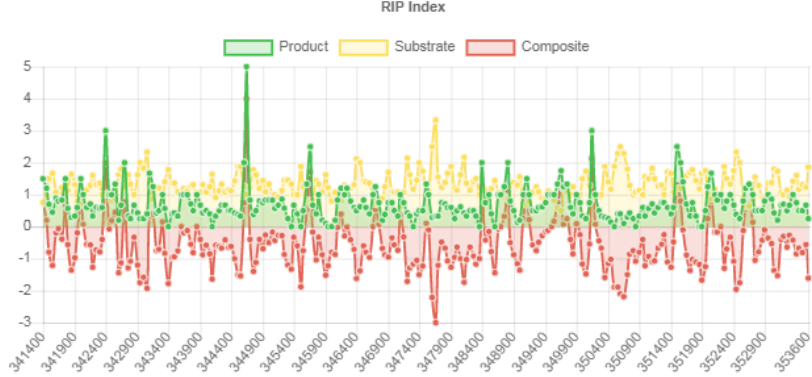

g28.58

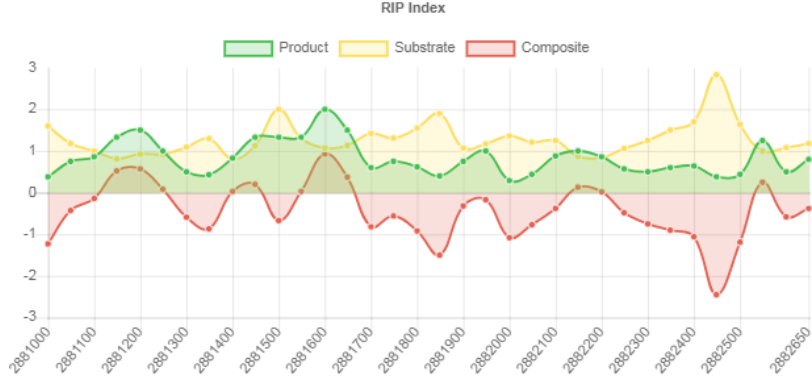

g4.113

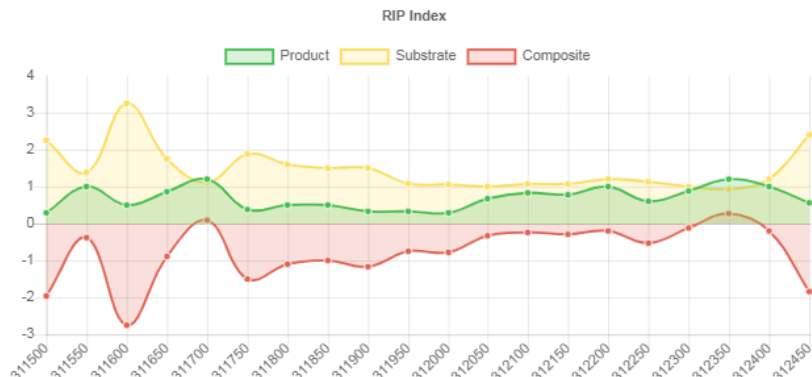

g8.22

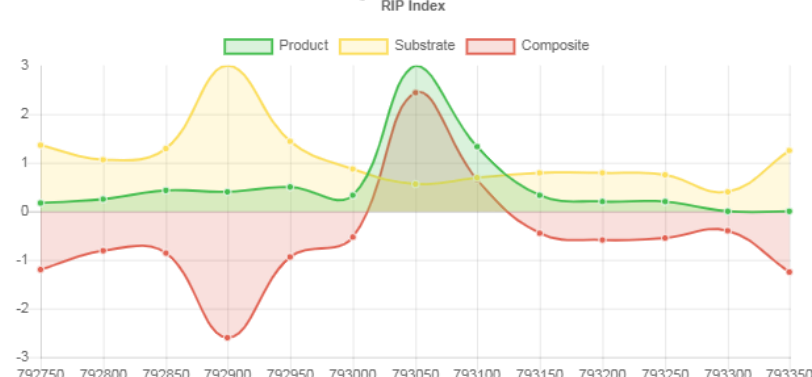

g4.107

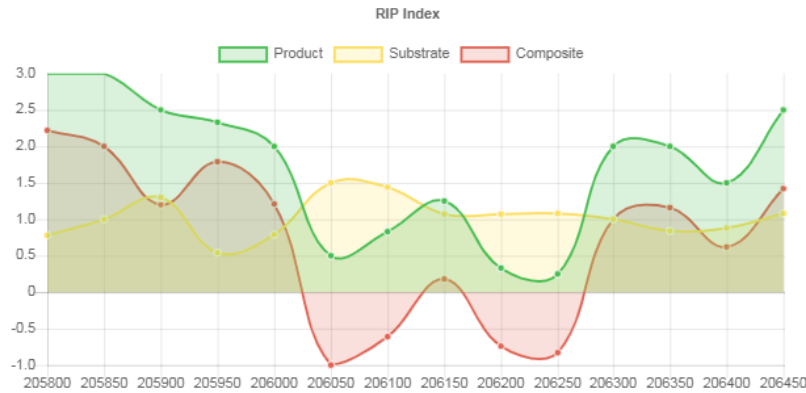

g29.43

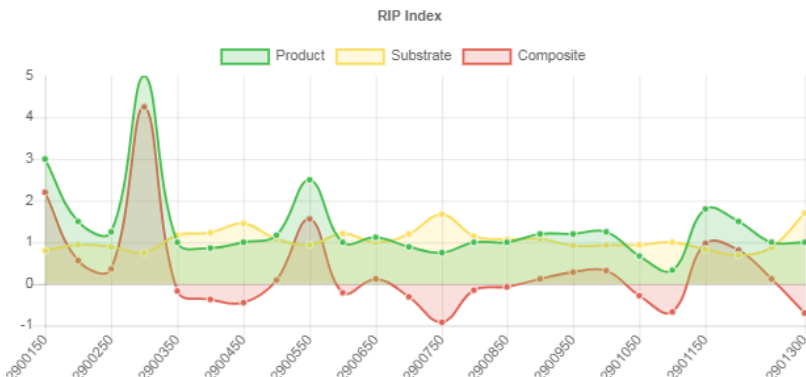

g4.9

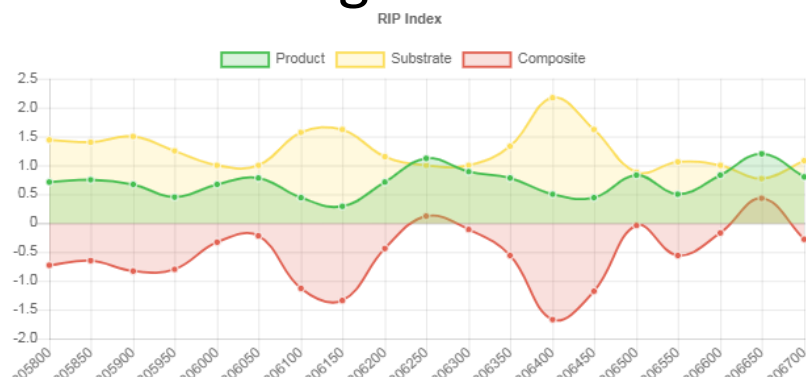

g39.51

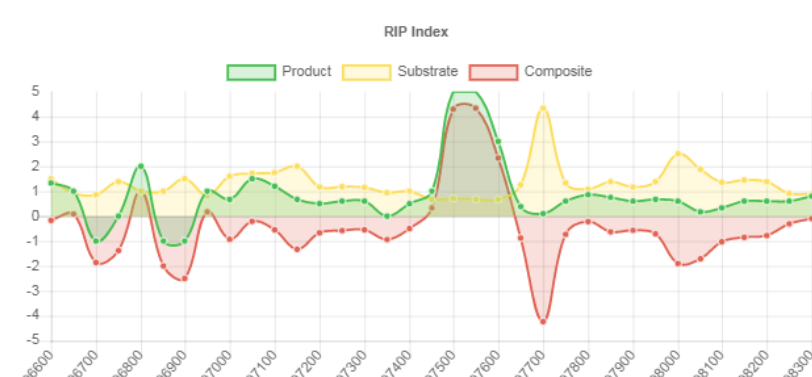

g16.12

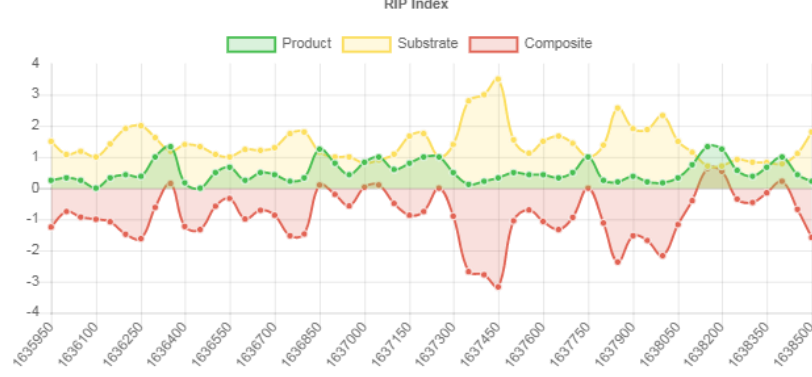

g10.86

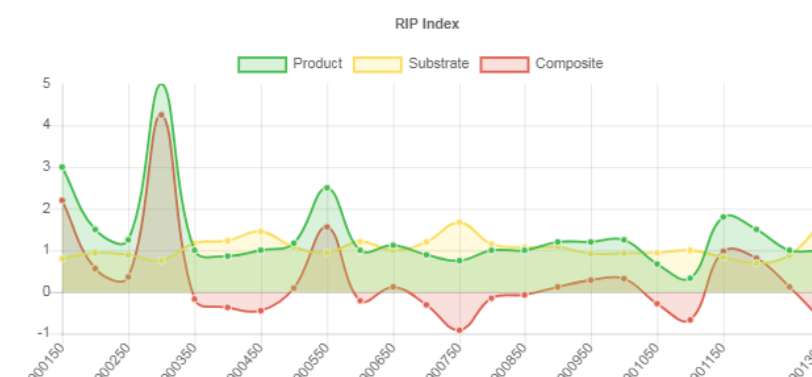

g14.70

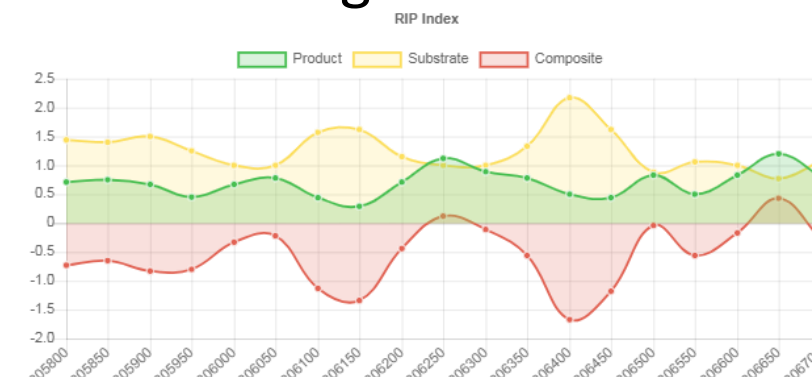

Supplement: Supplementary file 5 [file supplementary]
