# Supplementary material for: Repeat-Induced Point Mutations (RIP) Drives the Formation of Distinct Sub-Genomic Compartments in Fusarium Circinatum
Source: Preprints.org preprint supplement (doi:10.20944/preprints202012.0697.v1), 2020-12-28
Supplement: Supplementary file 1 [file supplementary]

## Sheet: Table S_1
Table S1: a) Summary of the alignment statistics and b) the sizes of F. circinatum chromosome assemblies investigated in this study.
a) Percentages of pairwise nucleotide identity (top row) and percentage query coverage (bottom row) of the 12 F. circinatum chromosomes1.
Chromosome
Fusarium circinatum (FSP34)	FFRA	FSOR	UG27	CMWF567
1	99.6	99.7	98.2	98
	99.6	99.7	98.2	93.6
2	99.7	99.6	96.5	97
	99.7	99.6	99.5	94.6
3	99.7	99.7	97.6	97.3
	99.7	99.7	97	91.5
4	99.6	99.6	97.3	97.2
	99.6	99.6	92.4	90.5
5	99.6	99.7	98.3	98.4
	99.6	99.7	95.8	95.7
6	99.6	99.6	96.1	97.2
	99.6	99.6	96.3	92
7	99.6	99.7	95.3	95.8
	99.6	99.7	94.9	92.1
8	99.7	99.4	98.2	98.3
	99.7	99.4	90	86
9	99.7	99.7	97.5	97.7
	99.7	99.7	97.4	92.9
10	99.5	99.5	97.4	97.6
	99.5	99.5	89.7	72.6
11	99.5	99.5	89.3	94.5
	99.5	99.5	93.9	87
12	88.1	92.8	92.8	81.5
	85.4	85.2	46.5	84.4
1FSP34 chromosomes were used as reference for these analyses.
b) Sizes (base pairs) of the chromosome assemblie for the five F. circinatum strains investigated.
Chromosome	FSP34	FFRA	FSOR	UG27	CMWF567
1	6407589	6432047	6423495	6430758	6430758
2	5065897	5798689	5013669	4976076	4976076
3	5081688	5295798	4976998	5257461	5257461
4	4313068	4744844	4516344	4236059	4236059
5	4432453	4376670	4316654	4425559	4425559
6	4301695	4287019	4366347	4358679	4358679
7	3540654	3832763	3547985	3591987	3591987
8	3172515	3465015	3168489	3202361	3202361
9	2981544	2907920	2831919	2952169	2952169
10	2698620	2564529	2553447	2564176	2564176
11	2228220	2202835	2272158	2247110	2247110
12	525065	809205	805519	978035	978035

## Sheet: Table S2
Table S2: Summary (given in percentages %) of the BUSCO results for the F. circinatum isolates investigated in this study.
	Fusarium circinatum strain
Description	FSP34	FSOR	FFRA	UG27	CMWF567
Complete BUSCOs	98.8	97.78	99	96.1	96.5
Complete and single-copy BUSCOs	97.9	98.8	98.6	95.8	96.2
Complete and duplicated BUSCOs	0.2	0.2	0.4	0.3	0.3
Fragmented BUSCOs	0.7	0.4	0.6	3.5	2.9
Missing BUSCOs	1.2	0.6	0.4	0.4	0.6

## Sheet: Table S3
Table S3: The genomic location of the F. circinatum RIP and RIP associated DNA methylation associated genes (as those described for in Neurospora crassa).
N. crassa query sequences	Fusarium circinatum strains
Protein Name and NCBI accession number	FSP34	FSOR	FFRA	CMW 567	UG27
HP-1	g30.102	g8707	g8978	g8745	g8714
XP_957632.1	Chromosome 6	Chromosome 6	Chromosome 6	Chromosome 6	Chromosome 6
	3 074 320-3 076 695 bp	3 131 733-3 134 108 bp	3 048 685-3 051 060 bp	3 046 286-3 048 661 bp	3 133 298-3 135 673 bp
DIM-2	g22.31	g9754	g10100	g9778	g9760
XP_959891.1	Chromosome 7	Chromosome 7	Chromosome 7	Chromosome 7	Chromosome 7
	2 248 015-2 252 033 bp	2 276 623-2 280 641 bp	2 290 718-2 294 736 bp	2 281 768-2 285 681 bp	2 240 190-2 244 208 bp
RID defective	g24.18	g8487	g8725	g8620	g8590
XP_011392925.1	Chromosomes 6	Chromosome 6	Chromosome 6	Chromosome 6	Chromosome 6
	2 487 938-2 488 599 bp	2 545 318-2 545 979bp	2 462 261-2 462 922 bp	2 460 560-2 461 221 bp	2 547 263-2 547 924 bp
DIM-5	g28.0	g7302	g7513	g7341	g7285
XP_957479.2	Chromosome 5	Chromosome 5	Chromosome 5	Chromosome 5	Chromosome 5
	277 129-280 278 bp	259 769-262 918 bp	3 106 515-3 107 659 bp	312 801-315 949 bp	345 730-348 879 bp
DIM-7	g14.27	g3479	g4013	g3471	g3482
XP_961308.2	Chromosome 3	Chromosome 3	Chromosome 3	Chromosome 3	Chromosome 3
	1 455 358-1 457 726 bp	1 479 526-1 481 894 bp	1 043 463-10 45 831 bp	1 502 748-1 505 115 bp	1 465 782-1 468 150 bp
Cul-4	g15.31	g15.16	g15.73	g9576	g4759
XP_957743.3	Chromosome 7	Chromosome 7	Chromosome 7	Chromosome 7	Chromosome 7
	1 527 639-1 530 132 bp	1 535 202-1 537 695 bp	1 540 809-1 543 302 bp	1 512 528-1 515 021 bp	1 491 066-1 493 559 bp
DBP-1	g13.103	g13.3	g20.32	g2354	g11886
XP_962347.1	Chromosome 2	Chromosome 2	Chromosome 2	Chromosome 2	Chromosome 2
	1 341 967-1 345 556	1 287 359-1 290 948 bp	1 556 617-1 560 206 bp	1 323 560-1 327 149 bp	1 280 974-1 284 563 bp

## Sheet: TableS_4
Table S4: Name and genomic locations of F. circinatum sequences with similarity to that of the FSP34 query set of effector genes.
	Fusarium circinatum strains
Number	FSP34	FSOR	FFRA	CMWF567	UG27
1	Chromosome 3	Chromosome 3	Chromosome 3	Chromosome 3	Chromosome 3
	309 447-313 607	322 362-329 823	4 858 103-4 860 925	370 284-377 283	341 682-348 904
	FCIRG_06237T1	g3.48	g3.39	g3752	g5.63
2	Chromosome 3	Chromosome 3	Chromosome 3	No significant similarity found	No significant similarity found
	320 458-321 733	333 373-334 642	4 869 114-4 870 383
	FCIRG_08174T1	g15.61	g3.101
3	Chromosome 3	Chromosome 3	Chromosome 3	Chromosome 3	Chromosome 3
	3 975 001-3 975 798	3 169 278-3 180 836	3 478 628-3 480 467	3 226 906-3 238 464	3 906 703-3 908 542
	FCIRG_08753T1	g39.61	g40.53	g4841	g39.51
4	Chromosome 4	Chromosome 4	Chromosome 4	Chromosome 4	Chromosome 4
	3 069 301-3 082 036	3 169 275-3 182 009	3 395 069-3 406 627	3 226 903-3 234 637	2 887 744-2 895 919
	FCIRG_01677T1	g31.74	g7.1	g6319	g28.58
5	Chromosome 4	Chromosome 4	Chromosome 4	Chromosome 4	Chromosome 4
	449 839-450 638	504 781-505 509	720 667-721 395	557 542-558 341	205 785-206 581
	FCIRG_07540T1	g5.67	g34.10	g5399	g4.107
6	Chromosome 7	Chromosome 7	Chromosome 7	Chromosome 7	Chromosome 7
	1 658 685-1 661 458	1 680 045-1 682 741	1 685 649-1 688 423	1 657 335-1 660 031	1 635 913-1 638 609
	FCIRG_04266T1	g16.33	g16.48	g10094	g16.12
7	Chromosome 8	Chromosome 8	Chromosome 8	Chromosome 11	Chromosome 11
	2 407 079- 2 407 934	271 711-272 553	533 482-534 324	680 057-680 546	716 215-717 067
	FCIRG_02294T1	g2.102	g2.138	g10756	g4.113
8	Chromosome 11	Chromosome 11	Chromosome 11	Chromosome 11	Chromosome 11
	276 663-277 747	328 729-329 286	261 846-262 930	263 544-264 700	305 759-306 843
	FCIRG_07147T1	g3.81	g2.35	g13924	g4.9
9	Chromosome 10	Chromosome 10	Chromosome 10	Chromosome 10	Chromosome 10
	1 010 417-1 011 367	1 053 146-1 054 093	1 054 326-1 055 273	1 106 531-1 107 357	1 087 006-1 087 953
	FCIRG_03031T1	g10.52	g10.58	g13259	g10.86
10	Chromosome 10	Chromosome 10	Chromosome 10	Chromosome 10	Chromosome 10
	734 640-735 830	758 193-758 966	759 316-760 089	808 235-809 008	792 808-793 581
	FCIRG_10713T1	g7.37	g7.17	g13145	g8.22
11	Chromosome 8	Chromosome 8	Chromosome 8	Chromosome 8	Chromosome 8
	2 782 118-2 806 049	2 611 584-2 6354 553	3 214 107-3 214 531	3 183 790-3 185 096	2 900 106-2 901 414
	FCIRG_10839T1	g26.94	g32.15	g11702	g29.43
12	Chromosome 11	Chromosome 11	Chromosome 11	Chromosome 11	Chromosome 11
	1 461 368-1 468 501	1 502 376-1 509 509	1 434 996-1 442 129	1 462 198-1 469 328	1 470 376-1 477 509
	FCIRG_12048T1	g15.66	g14.54	g14338	g14.70

## Sheet: Table S5
Table S5: InterProscan results of the genes sharing nucleotide similarity to that of the effector gene dataset of FSP341.
FSP34
Gene name	Description	GO IDs	GO Names	InterPro IDs	InterPro GO IDs	InterPro GO Names
FCIRG_06237T1	probable polyketide synthase	F:GO:0008168; F:GO:0016491; F:GO:0016874; F:GO:0031177; P:GO:0032259; P:GO:0055114	F:methyltransferase activity; F:oxidoreductase activity; F:ligase activity; F:phosphopantetheine binding; P:methylation; P:oxidation-reduction process	SM00822 (SMART); IPR020801 (SMART); IPR020807 (SMART); IPR020806 (SMART); G3DSA:3.30.300.30 (GENE3D); G3DSA:3.30.559.30 (GENE3D); IPR013120 (PFAM); IPR000873 (PFAM); IPR042099 (G3DSA:3.40.50.GENE3D); IPR009081 (PFAM); G3DSA:3.40.50.720 (GENE3D); IPR020807 (PFAM); G3DSA:3.40.50.150 (GENE3D); IPR023213 (G3DSA:3.30.559.GENE3D); IPR014043 (PFAM); IPR042104 (G3DSA:3.10.129.GENE3D); IPR036736 (G3DSA:1.…	F:GO:0003824; F:GO:0016740; F:GO:0031177	F:catalytic activity; F:transferase activity; F:phosphopantetheine binding
FCIRG_08174T1	putative polyketide synthase	F:GO:0008168; F:GO:0016491; F:GO:0016874; F:GO:0031177; P:GO:0032259; P:GO:0055114	F:methyltransferase activity; F:oxidoreductase activity; F:ligase activity; F:phosphopantetheine binding; P:methylation; P:oxidation-reduction process	IPR020841 (SMART); IPR016039 (G3DSA:3.40.47.GENE3D); IPR014031 (PFAM); IPR014030 (PFAM); PTHR43775 (PANTHER); PTHR43775:SF20 (PANTHER); cd00833 (CDD); IPR016039 (SUPERFAMILY)	F:GO:0003824	F:catalytic activity
FCIRG_08753T1	related to RAY38 protein	F:GO:0003723; C:GO:0016021	F:RNA binding; C:integral component of membrane	IPR006861 (SMART); IPR006861 (PFAM); IPR019084 (PFAM); mobidb-lite (MOBIDB_LITE); mobidb-lite (MOBIDB_LITE); mobidb-lite (MOBIDB_LITE); mobidb-lite (MOBIDB_LITE); mobidb-lite (MOBIDB_LITE); mobidb-lite (MOBIDB_LITE); mobidb-lite (MOBIDB_LITE); IPR039764 (PANTHER); PTHR12299:SF17 (PANTHER)	F:GO:0003723	F:RNA binding
FCIRG_01677T1	putative polyketide synthase	F:GO:0008168; F:GO:0016491; F:GO:0016874; F:GO:0031177; P:GO:0032259; P:GO:0055114	F:methyltransferase activity; F:oxidoreductase activity; F:ligase activity; F:phosphopantetheine binding; P:methylation; P:oxidation-reduction process	IPR020806 (SMART); IPR020841 (SMART); IPR020807 (SMART); SM00822 (SMART); IPR020801 (SMART); IPR036736 (G3DSA:1.10.1200.GENE3D); IPR014031 (PFAM); IPR014030 (PFAM); G3DSA:3.40.50.720 (GENE3D); IPR001242 (PFAM); IPR042099 (G3DSA:3.40.50.GENE3D); G3DSA:3.30.300.30 (GENE3D); IPR013120 (PFAM); IPR032821 (PFAM); G3DSA:3.40.50.720 (GENE3D); IPR014043 (PFAM); G3DSA:3.40.50.150 (GENE3D); IPR000873 (PFAM)…	F:GO:0003824; F:GO:0016740; F:GO:0031177	F:catalytic activity; F:transferase activity; F:phosphopantetheine binding
FCIRG_07540T1	murein transglycosylase	P:GO:0000272; F:GO:0003872; F:GO:0005524; C:GO:0005623; C:GO:0005739; C:GO:0005945; P:GO:0006002; F:GO:0008810; F:GO:0046872; F:GO:0046961; P:GO:0051453; P:GO:0061615; P:GO:1902600	P:polysaccharide catabolic process; F:6-phosphofructokinase activity; F:ATP binding; C:cell; C:mitochondrion; C:6-phosphofructokinase complex; P:fructose 6-phosphate metabolic process; F:cellulase activity; F:metal ion binding; F:proton-transporting ATPase activity, rotational mechanism; P:regulation of intracellular pH; P:glycolytic process through fructose-6-phosphate; P:proton transmembrane tr…	IPR013319 (G3DSA:2.60.120.GENE3D); IPR002594 (PFAM); PTHR34002:SF9 (PANTHER); IPR002594 (PANTHER); IPR013320 (SUPERFAMILY)	P:GO:0000272; F:GO:0004553; F:GO:0008810	P:polysaccharide catabolic process; F:hydrolase activity, hydrolyzing O-glycosyl compounds; F:cellulase activity
FCIRG_04266T1	hsp98-like protein	C:GO:0000139; F:GO:0000149; F:GO:0003924; F:GO:0005524; F:GO:0005525; C:GO:0005576; C:GO:0005634; C:GO:0005783; C:GO:0005789; C:GO:0005795; C:GO:0005801; C:GO:0005829; P:GO:0006890; F:GO:0016887; P:GO:0019538; C:GO:0031410; P:GO:0032258; P:GO:0032456; P:GO:0032482; C:GO:0034045; P:GO:0034497; P:GO:0034498; P:GO:0035493; P:GO:0035494; P:GO:0042026; P:GO:0043335; P:GO:0043549; P:GO:0048211; F:GO:00…	C:Golgi membrane; F:SNARE binding; F:GTPase activity; F:ATP binding; F:GTP binding; C:extracellular region; C:nucleus; C:endoplasmic reticulum; C:endoplasmic reticulum membrane; C:Golgi stack; C:cis-Golgi network; C:cytosol; P:retrograde vesicle-mediated transport, Golgi to endoplasmic reticulum; F:ATPase activity; P:protein metabolic process; C:cytoplasmic vesicle; P:cytoplasm to vacuole transpo…	IPR001270 (PRINTS); IPR019489 (SMART); IPR003593 (SMART); IPR004176 (PFAM); IPR041546 (PFAM); G3DSA:3.40.50.300 (GENE3D); G3DSA:3.40.50.300 (GENE3D); IPR036628 (G3DSA:1.10.1780.GENE3D); IPR003959 (PFAM); IPR003959 (PFAM); G3DSA:3.40.50.300 (GENE3D); G3DSA:1.10.8.60 (GENE3D); IPR019489 (PFAM); PTHR11638 (PANTHER); PTHR11638:SF127 (PANTHER); cd00009 (CDD); cd00009 (CDD); IPR027417 (SUPERFAMILY); IP…	F:GO:0005524; P:GO:0019538	F:ATP binding; P:protein metabolic process
FCIRG_02294T1	necrosis inducing -domain-containing	N/A	N/A	IPR008701 (PIRSF); IPR008701 (PFAM); PTHR33657:SF6 (PANTHER); IPR008701 (PANTHER)	no GO terms	no GO terms
FCIRG_07147T1	dTDP-glucose 4,6-dehydratase	F:GO:0008460; P:GO:0009225; F:GO:0016491; P:GO:0055114	F:dTDP-glucose 4,6-dehydratase activity; P:nucleotide-sugar metabolic process; F:oxidoreductase activity; P:oxidation-reduction process	IPR016040 (PFAM); G3DSA:3.90.25.10 (GENE3D); G3DSA:3.40.50.720 (GENE3D); PTHR43000:SF7 (PANTHER); PTHR43000 (PANTHER); IPR005888 (CDD); IPR036291 (SUPERFAMILY)	F:GO:0008460; P:GO:0009225	F:dTDP-glucose 4,6-dehydratase activity; P:nucleotide-sugar metabolic process
FCIRG_03031T1	murein transglycosylase	N/A	N/A	G3DSA:2.70.50.70 (GENE3D); IPR005103 (PFAM); mobidb-lite (MOBIDB_LITE); mobidb-lite (MOBIDB_LITE); PTHR33353 (PANTHER); PTHR33353:SF2 (PANTHER)	no GO terms	no GO terms
FCIRG_10713T1	hypothetical protein AU210_012851	F:GO:0004129; C:GO:0005743; C:GO:0016021; C:GO:0019867; P:GO:0022900; P:GO:1902600	F:cytochrome-c oxidase activity; C:mitochondrial inner membrane; C:integral component of membrane; C:outer membrane; P:electron transport chain; P:proton transmembrane transport	IPR011058 (SMART); IPR018392 (SMART); IPR036673 (G3DSA:2.30.60.GENE3D); IPR011058 (PFAM); IPR018392 (PFAM); IPR036779 (G3DSA:3.10.350.GENE3D); IPR008816 (PFAM); mobidb-lite (MOBIDB_LITE); mobidb-lite (MOBIDB_LITE); mobidb-lite (MOBIDB_LITE); mobidb-lite (MOBIDB_LITE); mobidb-lite (MOBIDB_LITE); mobidb-lite (MOBIDB_LITE); PTHR37014 (PANTHER); PTHR37014:SF1 (PANTHER); IPR018392 (PROSITE_PROFILES); …	C:GO:0019867	C:outer membrane
FCIRG_10839T1	related to cellulose binding protein CEL1	C:GO:0005576; P:GO:0005975; F:GO:0030248	C:extracellular region; P:carbohydrate metabolic process; F:cellulose binding	IPR000254 (SMART); G3DSA:2.70.50.70 (GENE3D); IPR005103 (PFAM); IPR000254 (PFAM); mobidb-lite (MOBIDB_LITE); mobidb-lite (MOBIDB_LITE); PTHR33353 (PANTHER); PTHR33353:SF11 (PANTHER); PD001821 (PRODOM); IPR000254 (PROSITE_PROFILES); IPR035971 (SUPERFAMILY)	C:GO:0005576; P:GO:0005975; F:GO:0030248	C:extracellular region; P:carbohydrate metabolic process; F:cellulose binding
FCIRG_12048T1	SpvB-domain-containing protein	C:GO:0005737	C:cytoplasm	IPR003284 (PRINTS); IPR022044 (PFAM); PF13517 (PFAM); IPR022385 (TIGRFAM); G3DSA:2.180.10.10 (GENE3D); IPR003284 (PFAM); mobidb-lite (MOBIDB_LITE); mobidb-lite (MOBIDB_LITE); mobidb-lite (MOBIDB_LITE); mobidb-lite (MOBIDB_LITE); PTHR32305:SF15 (PANTHER); PTHR32305:SF15 (PANTHER); PTHR32305 (PANTHER); PTHR32305 (PANTHER); SSF69318 (SUPERFAMILY); SSF89372 (SUPERFAMILY)	C:GO:0005737	C:cytoplasm
FFRA
g3.39	probable polyketide synthase	P:GO:0002682; C:GO:0005615; P:GO:0006953; F:GO:0008168; F:GO:0016491; F:GO:0016874; F:GO:0031177; P:GO:0032259; P:GO:0055114	P:regulation of immune system process; C:extracellular space; P:acute-phase response; F:methyltransferase activity; F:oxidoreductase activity; F:ligase activity; F:phosphopantetheine binding; P:methylation; P:oxidation-reduction process	IPR042099 (G3DSA:3.40.50.GENE3D); IPR001242 (PFAM); G3DSA:3.30.559.30 (GENE3D); IPR013120 (PFAM); IPR000873 (PFAM); G3DSA:3.40.50.720 (GENE3D); G3DSA:3.30.300.30 (GENE3D); IPR023213 (G3DSA:3.30.559.GENE3D); IPR009081 (PFAM); IPR036736 (G3DSA:1.10.1200.GENE3D); PTHR44845 (PANTHER); IPR009081 (PROSITE_PROFILES); cd05930 (CDD); SSF52777 (SUPERFAMILY); SSF56801 (SUPERFAMILY); SSF52777 (SUPERFAMILY); …	F:GO:0003824	F:catalytic activity
g3.101	probable polyketide synthase	F:GO:0008168; F:GO:0016491; F:GO:0016874; F:GO:0031177; P:GO:0032259; P:GO:0055114	F:methyltransferase activity; F:oxidoreductase activity; F:ligase activity; F:phosphopantetheine binding; P:methylation; P:oxidation-reduction process	IPR020807 (SMART); IPR020806 (SMART); IPR020841 (SMART); IPR020801 (SMART); SM00822 (SMART); IPR032821 (PFAM); G3DSA:3.30.70.3290 (GENE3D); G3DSA:3.40.50.150 (GENE3D); IPR020807 (PFAM); G3DSA:3.40.50.720 (GENE3D); IPR014043 (PFAM); IPR013217 (PFAM); IPR016039 (G3DSA:3.40.47.GENE3D); IPR013968 (PFAM); IPR036736 (G3DSA:1.10.1200.GENE3D); IPR001227 (G3DSA:3.40.366.GENE3D); IPR009081 (PFAM); IPR01403…	F:GO:0003824; F:GO:0016740; F:GO:0031177	F:catalytic activity; F:transferase activity; F:phosphopantetheine binding
g40.53	related to RAY38 protein	F:GO:0003723; C:GO:0016021	F:RNA binding; C:integral component of membrane	IPR006861 (SMART); IPR006861 (PFAM); IPR019084 (PFAM); mobidb-lite (MOBIDB_LITE); mobidb-lite (MOBIDB_LITE); mobidb-lite (MOBIDB_LITE); mobidb-lite (MOBIDB_LITE); mobidb-lite (MOBIDB_LITE); mobidb-lite (MOBIDB_LITE); mobidb-lite (MOBIDB_LITE); PTHR12299:SF17 (PANTHER); IPR039764 (PANTHER)	F:GO:0003723	F:RNA binding
g7.1	Structure-specific endonuclease subunit SLX1	C:GO:0000788; F:GO:0003677; F:GO:0005353; F:GO:0005355; P:GO:0006281; P:GO:0006310; P:GO:0006334; F:GO:0015578; P:GO:0015755; P:GO:0015761; C:GO:0016021; F:GO:0017108; C:GO:0031298; C:GO:0033557; F:GO:0046982; P:GO:0090305; P:GO:1904659	C:nuclear nucleosome; F:DNA binding; F:fructose transmembrane transporter activity; F:glucose transmembrane transporter activity; P:DNA repair; P:DNA recombination; P:nucleosome assembly; F:mannose transmembrane transporter activity; P:fructose transmembrane transport; P:mannose transmembrane transport; C:integral component of membrane; F:5'-flap endonuclease activity; C:replication fork protecti…	IPR035901 (G3DSA:3.40.1440.GENE3D); IPR000305 (PFAM); IPR013083 (G3DSA:3.30.40.GENE3D); PTHR20208:SF13 (PANTHER); PTHR20208 (PANTHER); IPR027520 (HAMAP); IPR000305 (PROSITE_PROFILES)	P:GO:0006281; F:GO:0017108; C:GO:0033557	P:DNA repair; F:5'-flap endonuclease activity; C:Slx1-Slx4 complex
g34.10	putative polyketide synthase	F:GO:0008168; F:GO:0016491; F:GO:0016874; F:GO:0031177; P:GO:0032259; P:GO:0055114	F:methyltransferase activity; F:oxidoreductase activity; F:ligase activity; F:phosphopantetheine binding; P:methylation; P:oxidation-reduction process	IPR020801 (SMART); IPR020806 (SMART); IPR020841 (SMART); SM00822 (SMART); IPR020807 (SMART); G3DSA:3.40.50.720 (GENE3D); IPR032821 (PFAM); G3DSA:3.30.300.30 (GENE3D); G3DSA:3.30.559.30 (GENE3D); IPR000873 (PFAM); IPR042099 (G3DSA:3.40.50.GENE3D); IPR042104 (G3DSA:3.10.129.GENE3D); IPR020807 (PFAM); IPR023213 (G3DSA:3.30.559.GENE3D); IPR009081 (PFAM); G3DSA:3.40.50.720 (GENE3D); IPR001227 (G3DSA:3…	F:GO:0003824; F:GO:0016740; F:GO:0031177	F:catalytic activity; F:transferase activity; F:phosphopantetheine binding
g16.48	hsp98-like protein	C:GO:0000139; F:GO:0000149; F:GO:0003924; F:GO:0005524; F:GO:0005525; C:GO:0005576; C:GO:0005634; C:GO:0005783; C:GO:0005789; C:GO:0005795; C:GO:0005801; C:GO:0005829; P:GO:0006890; F:GO:0016887; P:GO:0019538; C:GO:0031410; P:GO:0032258; P:GO:0032456; P:GO:0032482; C:GO:0034045; P:GO:0034497; P:GO:0034498; P:GO:0035493; P:GO:0035494; P:GO:0042026; P:GO:0043335; P:GO:0043549; P:GO:0048211; F:GO:00…	C:Golgi membrane; F:SNARE binding; F:GTPase activity; F:ATP binding; F:GTP binding; C:extracellular region; C:nucleus; C:endoplasmic reticulum; C:endoplasmic reticulum membrane; C:Golgi stack; C:cis-Golgi network; C:cytosol; P:retrograde vesicle-mediated transport, Golgi to endoplasmic reticulum; F:ATPase activity; P:protein metabolic process; C:cytoplasmic vesicle; P:cytoplasm to vacuole transpo…	IPR001270 (PRINTS); IPR019489 (SMART); IPR003593 (SMART); IPR036628 (G3DSA:1.10.1780.GENE3D); IPR041546 (PFAM); IPR019489 (PFAM); G3DSA:3.40.50.300 (GENE3D); IPR004176 (PFAM); G3DSA:1.10.8.60 (GENE3D); G3DSA:3.40.50.300 (GENE3D); G3DSA:3.40.50.300 (GENE3D); IPR003959 (PFAM); IPR003959 (PFAM); mobidb-lite (MOBIDB_LITE); PTHR11638 (PANTHER); PTHR11638:SF127 (PANTHER); cd00009 (CDD); cd00009 (CDD); …	F:GO:0005524; P:GO:0019538	F:ATP binding; P:protein metabolic process
g2.138	hypothetical protein FOPG_14384	N/A	N/A	IPR008701 (PFAM); mobidb-lite (MOBIDB_LITE); mobidb-lite (MOBIDB_LITE); PTHR33657:SF6 (PANTHER); IPR008701 (PANTHER)	no GO terms	no GO terms
g2.35	dTDP-glucose 4,6-dehydratase	F:GO:0008460; P:GO:0009225; F:GO:0016491; P:GO:0055114	F:dTDP-glucose 4,6-dehydratase activity; P:nucleotide-sugar metabolic process; F:oxidoreductase activity; P:oxidation-reduction process	G3DSA:3.40.50.720 (GENE3D); G3DSA:3.90.25.10 (GENE3D); IPR016040 (PFAM); PTHR43000 (PANTHER); PTHR43000:SF7 (PANTHER); IPR005888 (CDD); IPR036291 (SUPERFAMILY)	F:GO:0008460; P:GO:0009225	F:dTDP-glucose 4,6-dehydratase activity; P:nucleotide-sugar metabolic process
g10.58	murein transglycosylase	N/A	N/A	IPR005103 (PFAM); G3DSA:2.70.50.70 (GENE3D); mobidb-lite (MOBIDB_LITE); mobidb-lite (MOBIDB_LITE); PTHR33353:SF2 (PANTHER); PTHR33353 (PANTHER)	no GO terms	no GO terms
g7.17	hypothetical protein AU210_012851	F:GO:0004129; C:GO:0005743; C:GO:0016021; C:GO:0019867; P:GO:0022900; P:GO:1902600	F:cytochrome-c oxidase activity; C:mitochondrial inner membrane; C:integral component of membrane; C:outer membrane; P:electron transport chain; P:proton transmembrane transport	IPR011058 (SMART); IPR018392 (SMART); IPR036673 (G3DSA:2.30.60.GENE3D); IPR011058 (PFAM); IPR018392 (PFAM); IPR036779 (G3DSA:3.10.350.GENE3D); IPR008816 (PFAM); mobidb-lite (MOBIDB_LITE); mobidb-lite (MOBIDB_LITE); mobidb-lite (MOBIDB_LITE); mobidb-lite (MOBIDB_LITE); mobidb-lite (MOBIDB_LITE); mobidb-lite (MOBIDB_LITE); PTHR37014 (PANTHER); PTHR37014:SF1 (PANTHER); IPR018392 (PROSITE_PROFILES); …	C:GO:0019867	C:outer membrane
g32.15	endoglucanase	F:GO:0004553; C:GO:0005576; P:GO:0005975; F:GO:0030248	F:hydrolase activity, hydrolyzing O-glycosyl compounds; C:extracellular region; P:carbohydrate metabolic process; F:cellulose binding	IPR000254 (SMART); G3DSA:3.20.20.80 (GENE3D); IPR000254 (PFAM); IPR001547 (PFAM); mobidb-lite (MOBIDB_LITE); mobidb-lite (MOBIDB_LITE); PTHR34142 (PANTHER); PTHR34142:SF6 (PANTHER); PD001821 (PRODOM); IPR000254 (PROSITE_PROFILES); IPR035971 (SUPERFAMILY); IPR017853 (SUPERFAMILY)	F:GO:0004553; C:GO:0005576; P:GO:0005975; F:GO:0030248	F:hydrolase activity, hydrolyzing O-glycosyl compounds; C:extracellular region; P:carbohydrate metabolic process; F:cellulose binding
g14.54	Golgi apyrase	C:GO:0000795; F:GO:0005524; P:GO:0007131; C:GO:0016021; P:GO:0016567; F:GO:0016787; F:GO:0061630	C:synaptonemal complex; F:ATP binding; P:reciprocal meiotic recombination; C:integral component of membrane; P:protein ubiquitination; F:hydrolase activity; F:ubiquitin protein ligase activity	mobidb-lite (MOBIDB_LITE); mobidb-lite (MOBIDB_LITE); mobidb-lite (MOBIDB_LITE)	no GO terms	no GO terms
FSOR
g3.48	probable polyketide synthase	F:GO:0008168; F:GO:0016491; F:GO:0016874; F:GO:0031177; P:GO:0032259; P:GO:0055114	F:methyltransferase activity; F:oxidoreductase activity; F:ligase activity; F:phosphopantetheine binding; P:methylation; P:oxidation-reduction process	IPR020807 (SMART); IPR020806 (SMART); IPR020841 (SMART); IPR020801 (SMART); SM00822 (SMART); IPR032821 (PFAM); G3DSA:3.30.70.3290 (GENE3D); G3DSA:3.40.50.150 (GENE3D); IPR020807 (PFAM); G3DSA:3.40.50.720 (GENE3D); IPR014043 (PFAM); IPR013217 (PFAM); IPR016039 (G3DSA:3.40.47.GENE3D); IPR013968 (PFAM); IPR036736 (G3DSA:1.10.1200.GENE3D); IPR001227 (G3DSA:3.40.366.GENE3D); IPR009081 (PFAM); IPR01403…	F:GO:0003824; F:GO:0016740; F:GO:0031177	F:catalytic activity; F:transferase activity; F:phosphopantetheine binding
g15.61	related to general repressor of transcription	F:GO:0000981; F:GO:0003677; C:GO:0005634; P:GO:0006357; F:GO:0008270	F:DNA-binding transcription factor activity, RNA polymerase II-specific; F:DNA binding; C:nucleus; P:regulation of transcription by RNA polymerase II; F:zinc ion binding	IPR007219 (SMART); IPR007219 (PFAM); IPR001138 (PFAM); mobidb-lite (MOBIDB_LITE); mobidb-lite (MOBIDB_LITE); mobidb-lite (MOBIDB_LITE); mobidb-lite (MOBIDB_LITE); PTHR47338 (PANTHER); PTHR47338:SF15 (PANTHER); IPR001138 (PROSITE_PROFILES); cd12148 (CDD); IPR001138 (CDD); IPR036864 (SUPERFAMILY)	F:GO:0000981; F:GO:0003677; C:GO:0005634; P:GO:0006351; P:GO:0006355; F:GO:0008270	F:DNA-binding transcription factor activity, RNA polymerase II-specific; F:DNA binding; C:nucleus; P:transcription, DNA-templated; P:regulation of transcription, DNA-templated; F:zinc ion binding
g39.61	related to RAY38 protein	F:GO:0003723; C:GO:0016021	F:RNA binding; C:integral component of membrane	IPR006861 (SMART); IPR019084 (PFAM); IPR006861 (PFAM); mobidb-lite (MOBIDB_LITE); mobidb-lite (MOBIDB_LITE); mobidb-lite (MOBIDB_LITE); mobidb-lite (MOBIDB_LITE); mobidb-lite (MOBIDB_LITE); mobidb-lite (MOBIDB_LITE); mobidb-lite (MOBIDB_LITE); PTHR12299:SF17 (PANTHER); IPR039764 (PANTHER)	F:GO:0003723	F:RNA binding
g31.74	putative polyketide synthase	F:GO:0008168; F:GO:0016491; F:GO:0016874; F:GO:0031177; P:GO:0032259; P:GO:0055114	F:methyltransferase activity; F:oxidoreductase activity; F:ligase activity; F:phosphopantetheine binding; P:methylation; P:oxidation-reduction process	IPR020801 (SMART); IPR020806 (SMART); IPR020841 (SMART); SM00822 (SMART); IPR020807 (SMART); G3DSA:3.40.50.720 (GENE3D); IPR032821 (PFAM); G3DSA:3.30.300.30 (GENE3D); G3DSA:3.30.559.30 (GENE3D); IPR000873 (PFAM); IPR042099 (G3DSA:3.40.50.GENE3D); IPR042104 (G3DSA:3.10.129.GENE3D); IPR020807 (PFAM); IPR023213 (G3DSA:3.30.559.GENE3D); IPR009081 (PFAM); G3DSA:3.40.50.720 (GENE3D); IPR001227 (G3DSA:3…	F:GO:0003824; F:GO:0016740; F:GO:0031177	F:catalytic activity; F:transferase activity; F:phosphopantetheine binding
g5.67	murein transglycosylase	P:GO:0000272; F:GO:0003872; F:GO:0005524; C:GO:0005623; C:GO:0005739; C:GO:0005945; P:GO:0006002; F:GO:0008810; F:GO:0046872; F:GO:0046961; P:GO:0051453; P:GO:0061615; P:GO:1902600	P:polysaccharide catabolic process; F:6-phosphofructokinase activity; F:ATP binding; C:cell; C:mitochondrion; C:6-phosphofructokinase complex; P:fructose 6-phosphate metabolic process; F:cellulase activity; F:metal ion binding; F:proton-transporting ATPase activity, rotational mechanism; P:regulation of intracellular pH; P:glycolytic process through fructose-6-phosphate; P:proton transmembrane tr…	IPR013319 (G3DSA:2.60.120.GENE3D); IPR002594 (PFAM); IPR002594 (PANTHER); PTHR34002:SF9 (PANTHER); IPR013320 (SUPERFAMILY)	P:GO:0000272; F:GO:0004553; F:GO:0008810	P:polysaccharide catabolic process; F:hydrolase activity, hydrolyzing O-glycosyl compounds; F:cellulase activity
g16.33	hsp98-like protein	C:GO:0000139; F:GO:0000149; F:GO:0003924; F:GO:0005524; F:GO:0005525; C:GO:0005576; C:GO:0005634; C:GO:0005783; C:GO:0005789; C:GO:0005795; C:GO:0005801; C:GO:0005829; P:GO:0006890; F:GO:0016887; P:GO:0019538; C:GO:0031410; P:GO:0032258; P:GO:0032456; P:GO:0032482; C:GO:0034045; P:GO:0034497; P:GO:0034498; P:GO:0035493; P:GO:0035494; P:GO:0042026; P:GO:0043335; P:GO:0043549; P:GO:0048211; F:GO:00…	C:Golgi membrane; F:SNARE binding; F:GTPase activity; F:ATP binding; F:GTP binding; C:extracellular region; C:nucleus; C:endoplasmic reticulum; C:endoplasmic reticulum membrane; C:Golgi stack; C:cis-Golgi network; C:cytosol; P:retrograde vesicle-mediated transport, Golgi to endoplasmic reticulum; F:ATPase activity; P:protein metabolic process; C:cytoplasmic vesicle; P:cytoplasm to vacuole transpo…	IPR001270 (PRINTS); IPR019489 (SMART); IPR003593 (SMART); G3DSA:3.40.50.300 (GENE3D); IPR003959 (PFAM); IPR041546 (PFAM); IPR003959 (PFAM); G3DSA:3.40.50.300 (GENE3D); IPR004176 (PFAM); IPR019489 (PFAM); G3DSA:1.10.8.60 (GENE3D); IPR036628 (G3DSA:1.10.1780.GENE3D); G3DSA:3.40.50.300 (GENE3D); mobidb-lite (MOBIDB_LITE); PTHR11638 (PANTHER); PTHR11638:SF127 (PANTHER); cd00009 (CDD); cd00009 (CDD); …	F:GO:0005524; P:GO:0019538	F:ATP binding; P:protein metabolic process
g2.102	hypothetical protein FOPG_14384	N/A		IPR008701 (PFAM); mobidb-lite (MOBIDB_LITE); mobidb-lite (MOBIDB_LITE); IPR008701 (PANTHER); PTHR33657:SF6 (PANTHER)	no GO terms	no GO terms
g3.81	dTDP-glucose 4,6-dehydratase	F:GO:0008460; P:GO:0009225; F:GO:0016491; P:GO:0055114	F:dTDP-glucose 4,6-dehydratase activity; P:nucleotide-sugar metabolic process; F:oxidoreductase activity; P:oxidation-reduction process	IPR016040 (PFAM); G3DSA:3.40.50.720 (GENE3D); G3DSA:3.90.25.10 (GENE3D); PTHR43000 (PANTHER); PTHR43000:SF7 (PANTHER); IPR005888 (CDD); IPR036291 (SUPERFAMILY)	F:GO:0008460; P:GO:0009225	F:dTDP-glucose 4,6-dehydratase activity; P:nucleotide-sugar metabolic process
g10.52	murein transglycosylase	N/A	N/A	IPR005103 (PFAM); G3DSA:2.70.50.70 (GENE3D); mobidb-lite (MOBIDB_LITE); mobidb-lite (MOBIDB_LITE); PTHR33353:SF2 (PANTHER); PTHR33353 (PANTHER)	no GO terms	no GO terms
g7.37	hypothetical protein AU210_012851	F:GO:0004129; C:GO:0005743; C:GO:0016021; C:GO:0019867; P:GO:0022900; P:GO:1902600	F:cytochrome-c oxidase activity; C:mitochondrial inner membrane; C:integral component of membrane; C:outer membrane; P:electron transport chain; P:proton transmembrane transport	IPR011058 (SMART); IPR018392 (SMART); IPR036673 (G3DSA:2.30.60.GENE3D); IPR011058 (PFAM); IPR018392 (PFAM); IPR036779 (G3DSA:3.10.350.GENE3D); IPR008816 (PFAM); mobidb-lite (MOBIDB_LITE); mobidb-lite (MOBIDB_LITE); mobidb-lite (MOBIDB_LITE); mobidb-lite (MOBIDB_LITE); mobidb-lite (MOBIDB_LITE); mobidb-lite (MOBIDB_LITE); PTHR37014 (PANTHER); PTHR37014:SF1 (PANTHER); IPR018392 (PROSITE_PROFILES); …	C:GO:0019867	C:outer membrane
g26.94	related to cellulose binding protein CEL1	C:GO:0005576; P:GO:0005975; F:GO:0030248	C:extracellular region; P:carbohydrate metabolic process; F:cellulose binding	IPR000254 (SMART); IPR000254 (PFAM); IPR005103 (PFAM); G3DSA:2.70.50.70 (GENE3D); mobidb-lite (MOBIDB_LITE); mobidb-lite (MOBIDB_LITE); PTHR33353:SF11 (PANTHER); PTHR33353 (PANTHER); PD001821 (PRODOM); IPR000254 (PROSITE_PROFILES); IPR035971 (SUPERFAMILY)	C:GO:0005576; P:GO:0005975; F:GO:0030248	C:extracellular region; P:carbohydrate metabolic process; F:cellulose binding
g15.66	SpvB-domain-containing protein	C:GO:0005737	C:cytoplasm	IPR003284 (PRINTS); IPR022385 (TIGRFAM); G3DSA:2.180.10.10 (GENE3D); IPR003284 (PFAM); IPR021860 (PFAM); IPR001466 (PFAM); IPR012338 (G3DSA:3.40.710.GENE3D); IPR022044 (PFAM); IPR022045 (PFAM); mobidb-lite (MOBIDB_LITE); mobidb-lite (MOBIDB_LITE); PTHR43645 (PANTHER); IPR012338 (SUPERFAMILY); SSF69318 (SUPERFAMILY)	C:GO:0005737	C:cytoplasm
UG27
g5.63	putative polyketide synthase	F:GO:0008168; F:GO:0016491; F:GO:0016874; F:GO:0031177; P:GO:0032259; P:GO:0055114	F:methyltransferase activity; F:oxidoreductase activity; F:ligase activity; F:phosphopantetheine binding; P:methylation; P:oxidation-reduction process	SM00822 (SMART); IPR020841 (SMART); IPR020807 (SMART); IPR020806 (SMART); IPR020801 (SMART); IPR013217 (PFAM); IPR001227 (G3DSA:3.40.366.GENE3D); IPR036736 (G3DSA:1.10.1200.GENE3D); IPR020807 (PFAM); IPR036736 (G3DSA:1.10.1200.GENE3D); IPR013968 (PFAM); G3DSA:3.30.559.30 (GENE3D); G3DSA:3.40.50.720 (GENE3D); IPR001242 (PFAM); IPR016039 (G3DSA:3.40.47.GENE3D); IPR023213 (G3DSA:3.30.559.GENE3D); IP…	F:GO:0003824; F:GO:0016740; F:GO:0031177	F:catalytic activity; F:transferase activity; F:phosphopantetheine binding
g39.51	related to RAY38 protein	F:GO:0003723; C:GO:0016021	F:RNA binding; C:integral component of membrane	IPR006861 (SMART); IPR006861 (PFAM); IPR019084 (PFAM); mobidb-lite (MOBIDB_LITE); mobidb-lite (MOBIDB_LITE); mobidb-lite (MOBIDB_LITE); mobidb-lite (MOBIDB_LITE); mobidb-lite (MOBIDB_LITE); mobidb-lite (MOBIDB_LITE); mobidb-lite (MOBIDB_LITE); PTHR12299:SF17 (PANTHER); IPR039764 (PANTHER)	F:GO:0003723	F:RNA binding
g39	beta-fructofuranosidase	F:GO:0004553; P:GO:0005975	F:hydrolase activity, hydrolyzing O-glycosyl compounds; P:carbohydrate metabolic process	IPR001362 (SMART); IPR023296 (G3DSA:2.115.10.GENE3D); IPR013148 (PFAM); G3DSA:2.60.120.560 (GENE3D); PTHR42800:SF2 (PANTHER); PTHR42800 (PANTHER); cd18622 (CDD); IPR013320 (SUPERFAMILY); IPR023296 (SUPERFAMILY)	F:GO:0004553; P:GO:0005975	F:hydrolase activity, hydrolyzing O-glycosyl compounds; P:carbohydrate metabolic process
g4.107	murein transglycosylase	P:GO:0000272; F:GO:0003872; F:GO:0005524; C:GO:0005623; C:GO:0005739; C:GO:0005945; P:GO:0006002; F:GO:0008810; F:GO:0046872; F:GO:0046961; P:GO:0051453; P:GO:0061615; P:GO:1902600	P:polysaccharide catabolic process; F:6-phosphofructokinase activity; F:ATP binding; C:cell; C:mitochondrion; C:6-phosphofructokinase complex; P:fructose 6-phosphate metabolic process; F:cellulase activity; F:metal ion binding; F:proton-transporting ATPase activity, rotational mechanism; P:regulation of intracellular pH; P:glycolytic process through fructose-6-phosphate; P:proton transmembrane tr…	IPR013319 (G3DSA:2.60.120.GENE3D); IPR002594 (PFAM); IPR002594 (PANTHER); PTHR34002:SF9 (PANTHER); IPR013320 (SUPERFAMILY)	P:GO:0000272; F:GO:0004553; F:GO:0008810	P:polysaccharide catabolic process; F:hydrolase activity, hydrolyzing O-glycosyl compounds; F:cellulase activity
g16.12	hsp98-like protein	C:GO:0000139; F:GO:0000149; F:GO:0003924; F:GO:0005524; F:GO:0005525; C:GO:0005576; C:GO:0005634; C:GO:0005783; C:GO:0005789; C:GO:0005795; C:GO:0005801; C:GO:0005829; P:GO:0006890; F:GO:0016887; P:GO:0019538; C:GO:0031410; P:GO:0032258; P:GO:0032456; P:GO:0032482; C:GO:0034045; P:GO:0034497; P:GO:0034498; P:GO:0035493; P:GO:0035494; P:GO:0042026; P:GO:0043335; P:GO:0043549; P:GO:0048211; F:GO:00…	C:Golgi membrane; F:SNARE binding; F:GTPase activity; F:ATP binding; F:GTP binding; C:extracellular region; C:nucleus; C:endoplasmic reticulum; C:endoplasmic reticulum membrane; C:Golgi stack; C:cis-Golgi network; C:cytosol; P:retrograde vesicle-mediated transport, Golgi to endoplasmic reticulum; F:ATPase activity; P:protein metabolic process; C:cytoplasmic vesicle; P:cytoplasm to vacuole transpo…	IPR001270 (PRINTS); IPR019489 (SMART); IPR003593 (SMART); IPR036628 (G3DSA:1.10.1780.GENE3D); IPR041546 (PFAM); IPR019489 (PFAM); G3DSA:3.40.50.300 (GENE3D); IPR004176 (PFAM); G3DSA:1.10.8.60 (GENE3D); G3DSA:3.40.50.300 (GENE3D); G3DSA:3.40.50.300 (GENE3D); IPR003959 (PFAM); IPR003959 (PFAM); mobidb-lite (MOBIDB_LITE); PTHR11638 (PANTHER); PTHR11638:SF127 (PANTHER); cd00009 (CDD); cd00009 (CDD); …	F:GO:0005524; P:GO:0019538	F:ATP binding; P:protein metabolic process
g4.113	hypothetical protein FOPG_14384	N/A	N/A	IPR008701 (PFAM); mobidb-lite (MOBIDB_LITE); mobidb-lite (MOBIDB_LITE); PTHR33657:SF6 (PANTHER); IPR008701 (PANTHER)	no GO terms	no GO terms
g4.9	dTDP-glucose 4,6-dehydratase	F:GO:0008460; P:GO:0009225; F:GO:0016491; P:GO:0055114	F:dTDP-glucose 4,6-dehydratase activity; P:nucleotide-sugar metabolic process; F:oxidoreductase activity; P:oxidation-reduction process	G3DSA:3.40.50.720 (GENE3D); IPR016040 (PFAM); G3DSA:3.90.25.10 (GENE3D); PTHR43000:SF7 (PANTHER); PTHR43000 (PANTHER); IPR005888 (CDD); IPR036291 (SUPERFAMILY)	F:GO:0008460; P:GO:0009225	F:dTDP-glucose 4,6-dehydratase activity; P:nucleotide-sugar metabolic process
g10.86	murein transglycosylase	N/A	N/A	IPR005103 (PFAM); G3DSA:2.70.50.70 (GENE3D); mobidb-lite (MOBIDB_LITE); mobidb-lite (MOBIDB_LITE); PTHR33353:SF2 (PANTHER); PTHR33353 (PANTHER)	no GO terms	no GO terms
g8.22	hypothetical protein AU210_012851	F:GO:0004129; C:GO:0005743; C:GO:0016021; C:GO:0019867; P:GO:0022900; P:GO:1902600	F:cytochrome-c oxidase activity; C:mitochondrial inner membrane; C:integral component of membrane; C:outer membrane; P:electron transport chain; P:proton transmembrane transport	IPR011058 (SMART); IPR018392 (SMART); IPR036673 (G3DSA:2.30.60.GENE3D); IPR011058 (PFAM); IPR018392 (PFAM); IPR036779 (G3DSA:3.10.350.GENE3D); IPR008816 (PFAM); mobidb-lite (MOBIDB_LITE); mobidb-lite (MOBIDB_LITE); mobidb-lite (MOBIDB_LITE); mobidb-lite (MOBIDB_LITE); mobidb-lite (MOBIDB_LITE); mobidb-lite (MOBIDB_LITE); PTHR37014 (PANTHER); PTHR37014:SF1 (PANTHER); IPR018392 (PROSITE_PROFILES); …	C:GO:0019867	C:outer membrane
g29.43	related to cellulose binding protein CEL1	C:GO:0005576; P:GO:0005975; F:GO:0030248	C:extracellular region; P:carbohydrate metabolic process; F:cellulose binding	IPR000254 (SMART); IPR000254 (PFAM); IPR005103 (PFAM); G3DSA:2.70.50.70 (GENE3D); mobidb-lite (MOBIDB_LITE); mobidb-lite (MOBIDB_LITE); PTHR33353:SF11 (PANTHER); PTHR33353 (PANTHER); PD001821 (PRODOM); IPR000254 (PROSITE_PROFILES); IPR035971 (SUPERFAMILY)	C:GO:0005576; P:GO:0005975; F:GO:0030248	C:extracellular region; P:carbohydrate metabolic process; F:cellulose binding
g14.70	SpvB-domain-containing protein	C:GO:0005737	C:cytoplasm	IPR003284 (PFAM); IPR012338 (G3DSA:3.40.710.GENE3D); IPR022385 (TIGRFAM); PF13517 (PFAM); IPR021860 (PFAM); IPR022044 (PFAM); IPR001466 (PFAM); G3DSA:2.180.10.10 (GENE3D); IPR022045 (PFAM); PTHR43645 (PANTHER); SSF69318 (SUPERFAMILY); IPR012338 (SUPERFAMILY)	C:GO:0005737	C:cytoplasm
CMWF567
g3752	catalase	F:GO:0003700; F:GO:0004096; C:GO:0005680; C:GO:0005737; P:GO:0006355; P:GO:0006979; P:GO:0007367; P:GO:0016567; F:GO:0020037; P:GO:0031145; P:GO:0042744; F:GO:0043565; P:GO:0045842; F:GO:0046872; P:GO:0051301; P:GO:0055114; F:GO:0061630; P:GO:0098869	F:DNA-binding transcription factor activity; F:catalase activity; C:anaphase-promoting complex; C:cytoplasm; P:regulation of transcription, DNA-templated; P:response to oxidative stress; P:segment polarity determination; P:protein ubiquitination; F:heme binding; P:anaphase-promoting complex-dependent catabolic process; P:hydrogen peroxide catabolic process; F:sequence-specific DNA binding; P:posi…	IPR018028 (PRINTS); IPR011614 (SMART); IPR037060 (G3DSA:2.40.180.GENE3D); IPR011614 (PFAM); IPR010582 (PFAM); IPR024711 (PIRSF); IPR018028 (PANTHER); PTHR11465:SF26 (PANTHER); IPR018028 (PROSITE_PROFILES); IPR020835 (SUPERFAMILY)	F:GO:0004096; P:GO:0006979; F:GO:0020037; P:GO:0055114	F:catalase activity; P:response to oxidative stress; F:heme binding; P:oxidation-reduction process
g4841	related to RAY38 protein	F:GO:0003723; C:GO:0016021	F:RNA binding; C:integral component of membrane	IPR006861 (SMART); IPR019084 (PFAM); IPR006861 (PFAM); mobidb-lite (MOBIDB_LITE); mobidb-lite (MOBIDB_LITE); mobidb-lite (MOBIDB_LITE); mobidb-lite (MOBIDB_LITE); mobidb-lite (MOBIDB_LITE); mobidb-lite (MOBIDB_LITE); mobidb-lite (MOBIDB_LITE); PTHR12299:SF17 (PANTHER); IPR039764 (PANTHER)	F:GO:0003723	F:RNA binding
g6319	putative polyketide synthase	F:GO:0008168; F:GO:0016491; F:GO:0016874; F:GO:0031177; P:GO:0032259; P:GO:0055114	F:methyltransferase activity; F:oxidoreductase activity; F:ligase activity; F:phosphopantetheine binding; P:methylation; P:oxidation-reduction process	IPR020841 (SMART); IPR020807 (SMART); SM00822 (SMART); IPR020801 (SMART); IPR020806 (SMART); G3DSA:3.30.559.30 (GENE3D); IPR020807 (PFAM); IPR014030 (PFAM); G3DSA:3.30.300.30 (GENE3D); IPR036736 (G3DSA:1.10.1200.GENE3D); G3DSA:3.40.50.720 (GENE3D); IPR013968 (PFAM); IPR014031 (PFAM); IPR001227 (G3DSA:3.40.366.GENE3D); G3DSA:3.40.50.720 (GENE3D); IPR014043 (PFAM); IPR000873 (PFAM); IPR032821 (PFAM…	F:GO:0003824; F:GO:0016740; F:GO:0031177	F:catalytic activity; F:transferase activity; F:phosphopantetheine binding
g5399	murein transglycosylase	P:GO:0000272; F:GO:0003872; F:GO:0005524; C:GO:0005623; C:GO:0005739; C:GO:0005945; P:GO:0006002; F:GO:0008810; F:GO:0046872; F:GO:0046961; P:GO:0051453; P:GO:0061615; P:GO:1902600	P:polysaccharide catabolic process; F:6-phosphofructokinase activity; F:ATP binding; C:cell; C:mitochondrion; C:6-phosphofructokinase complex; P:fructose 6-phosphate metabolic process; F:cellulase activity; F:metal ion binding; F:proton-transporting ATPase activity, rotational mechanism; P:regulation of intracellular pH; P:glycolytic process through fructose-6-phosphate; P:proton transmembrane tr…	IPR013319 (G3DSA:2.60.120.GENE3D); IPR002594 (PFAM); IPR002594 (PANTHER); PTHR34002:SF9 (PANTHER); IPR013320 (SUPERFAMILY)	P:GO:0000272; F:GO:0004553; F:GO:0008810	P:polysaccharide catabolic process; F:hydrolase activity, hydrolyzing O-glycosyl compounds; F:cellulase activity
g10094	hsp98-like protein	C:GO:0000139; F:GO:0000149; F:GO:0003924; F:GO:0005524; F:GO:0005525; C:GO:0005576; C:GO:0005634; C:GO:0005783; C:GO:0005789; C:GO:0005795; C:GO:0005801; C:GO:0005829; P:GO:0006890; F:GO:0016887; P:GO:0019538; C:GO:0031410; P:GO:0032258; P:GO:0032456; P:GO:0032482; C:GO:0034045; P:GO:0034497; P:GO:0034498; P:GO:0035493; P:GO:0035494; P:GO:0042026; P:GO:0043335; P:GO:0043549; P:GO:0048211; F:GO:00…	C:Golgi membrane; F:SNARE binding; F:GTPase activity; F:ATP binding; F:GTP binding; C:extracellular region; C:nucleus; C:endoplasmic reticulum; C:endoplasmic reticulum membrane; C:Golgi stack; C:cis-Golgi network; C:cytosol; P:retrograde vesicle-mediated transport, Golgi to endoplasmic reticulum; F:ATPase activity; P:protein metabolic process; C:cytoplasmic vesicle; P:cytoplasm to vacuole transpo…	IPR001270 (PRINTS); IPR019489 (SMART); IPR003593 (SMART); IPR003959 (PFAM); G3DSA:3.40.50.300 (GENE3D); IPR041546 (PFAM); IPR019489 (PFAM); IPR004176 (PFAM); IPR003959 (PFAM); G3DSA:3.40.50.300 (GENE3D); G3DSA:3.40.50.300 (GENE3D); G3DSA:1.10.8.60 (GENE3D); IPR036628 (G3DSA:1.10.1780.GENE3D); mobidb-lite (MOBIDB_LITE); PTHR11638:SF127 (PANTHER); PTHR11638 (PANTHER); cd00009 (CDD); cd00009 (CDD); …	F:GO:0005524; P:GO:0019538	F:ATP binding; P:protein metabolic process
g10756	uncharacterized protein FRV6_05072	N/A	N/A	IPR008701 (PFAM); mobidb-lite (MOBIDB_LITE); mobidb-lite (MOBIDB_LITE); mobidb-lite (MOBIDB_LITE); PTHR33657:SF6 (PANTHER); IPR008701 (PANTHER)	no GO terms	no GO terms
g13924	dTDP-glucose 4,6-dehydratase	F:GO:0008460; P:GO:0009225; F:GO:0016491; P:GO:0055114	F:dTDP-glucose 4,6-dehydratase activity; P:nucleotide-sugar metabolic process; F:oxidoreductase activity; P:oxidation-reduction process	IPR016040 (PFAM); G3DSA:3.40.50.720 (GENE3D); G3DSA:3.90.25.10 (GENE3D); PTHR43000 (PANTHER); PTHR43000:SF7 (PANTHER); IPR005888 (CDD); IPR036291 (SUPERFAMILY)	F:GO:0008460; P:GO:0009225	F:dTDP-glucose 4,6-dehydratase activity; P:nucleotide-sugar metabolic process
g13259	murein transglycosylase	N/A	N/A	IPR005103 (PFAM); G3DSA:2.70.50.70 (GENE3D); G3DSA:2.70.50.70 (GENE3D); mobidb-lite (MOBIDB_LITE); mobidb-lite (MOBIDB_LITE); mobidb-lite (MOBIDB_LITE); mobidb-lite (MOBIDB_LITE); mobidb-lite (MOBIDB_LITE); PTHR33353:SF2 (PANTHER); PTHR33353 (PANTHER); PTHR33353 (PANTHER); PTHR33353:SF2 (PANTHER)	no GO terms	no GO terms
g13145	hypothetical protein AU210_012851	F:GO:0004129; C:GO:0005743; C:GO:0016021; C:GO:0019867; P:GO:0022900; P:GO:1902600	F:cytochrome-c oxidase activity; C:mitochondrial inner membrane; C:integral component of membrane; C:outer membrane; P:electron transport chain; P:proton transmembrane transport	IPR011058 (SMART); IPR018392 (SMART); IPR036673 (G3DSA:2.30.60.GENE3D); IPR011058 (PFAM); IPR018392 (PFAM); IPR036779 (G3DSA:3.10.350.GENE3D); IPR008816 (PFAM); mobidb-lite (MOBIDB_LITE); mobidb-lite (MOBIDB_LITE); mobidb-lite (MOBIDB_LITE); mobidb-lite (MOBIDB_LITE); mobidb-lite (MOBIDB_LITE); mobidb-lite (MOBIDB_LITE); PTHR37014 (PANTHER); PTHR37014:SF1 (PANTHER); IPR018392 (PROSITE_PROFILES); …	C:GO:0019867	C:outer membrane
g11702	related to cellulose binding protein CEL1	C:GO:0005576; P:GO:0005975; F:GO:0030248	C:extracellular region; P:carbohydrate metabolic process; F:cellulose binding	IPR000254 (SMART); IPR005103 (PFAM); G3DSA:2.70.50.70 (GENE3D); IPR000254 (PFAM); mobidb-lite (MOBIDB_LITE); mobidb-lite (MOBIDB_LITE); PTHR33353:SF11 (PANTHER); PTHR33353 (PANTHER); PTHR33353 (PANTHER); PTHR33353:SF11 (PANTHER); PD001821 (PRODOM); IPR000254 (PROSITE_PROFILES); IPR035971 (SUPERFAMILY)	C:GO:0005576; P:GO:0005975; F:GO:0030248	C:extracellular region; P:carbohydrate metabolic process; F:cellulose binding
g14338	SpvB-domain-containing protein	C:GO:0005737	C:cytoplasm	IPR003284 (PRINTS); PF13517 (PFAM); IPR003284 (PFAM); IPR022044 (PFAM); G3DSA:2.180.10.10 (GENE3D); IPR022045 (PFAM); mobidb-lite (MOBIDB_LITE); mobidb-lite (MOBIDB_LITE); PTHR45460 (PANTHER); SSF69318 (SUPERFAMILY)	C:GO:0005737	C:cytoplasm
1F, C, and P referes to Molecular function, Cellular component, and Biological process, respectively.

## Sheet: Table S6
Table S6: RIP statistics of the coding genomic compartment of the F. circinatum isolates investigated.
	CMWF567	FFRA	FSOR	UG27	FSP34
Size of coding dataset (bp)	23805432	23317992	22327539	21047013	21948516
GC content of the dataset (%)	50.95	51.54	51.56	51.68	51.56
Proportion of coding compartment that constitutes RIP (%)	2.4	2.02	2.02	1.96	2.01
Total count of LRARs	5	0	0	2	0
Total proportion that constitute LRARs (bp)	3450	0	0	450	0
Count of predicted genes with RIP1	5835	5353	5138	4678	5002
Percentage of genes with windows indicating RIP (%)1	41.2105	32.4247	32.5149	33.3714	32.2356
1At least a single window, 50 bp in size, with RIP index values indicative of RIP mutations.

## Sheet: Table S7
Table S7: RIP statistics of the GC-light and GC heavy isochore components (see text) of the sequenced isolates of F. circinatum isolates investigated in this study.
	FSP34				UG27				CMWF567				FFRA				FSOR
Description	0-20	20-40	40-50	50-100	0-20	20-40	40-50	50-100	0-20	20-40	40-50	50-100	0-20	20-40	40-50	50-100	0-20	20-40	40-50	50-100
Size of the isochore component (bp)	1751418	1298829	37383759	4666138	1851575	1537897	37586979	4715752	1970849	1557539	38668689	4666432	1960159	1016000	39798558	4801436	1855076	1006951	38245718	4476330
Average GC content of isochore component (%)	16.44	26.9	48.55	51.33	16.44	26.56	48.55	51.39	16.44	27.32	48.52	51.36	16.04	26.75	48.51	51.3	15.98	27.05	48.51	51.45
Number of windows with RIP	3574	2228	172	9	3769	2734	158	4	4004	2603	193	5	3935	1745	224	6	3722	1679	225	3
RIP affected proportion of isochore component (%)	99.09	83.07	0.23	0.09	99.16	86.66	0.21	0.04	98.96	81.22	0.25	0.05	97.89	81.54	0.28	0.06	97.66	78.83	0.29	0.03
Total count of LRARs	15	36	0	0	17	25	0	0	20	44	0	0	22	25	0	0	21	26	1	0
Average size of LRARs (bp)	10232.3	11402.1	0	0	11399.5	13602.8	0	0	14978.3	11151.3	0	0	14219.1	8542.16	0	0	14175.7	10895.1	10000	0
Average GC content of LRARs (%)	16.75	26.55	0	0	16.7	25.47	0	0	17.05	27.36	0	0	17	26.58	0	0	17.32	26.46	18.23	0
Genomic proportion of LRARs (bp)	153484	410477	0	0	193792	340071	0	0	299566	490657	0	0	312821	213554	0	0	297689	283273	10000	0
Average RIP product value of LRARs	1.5	1.65	0	0	1.53	1.68	0	0	1.56	1.67	0	0	1.56	1.72	0	0	1.56	1.72	1.5	0
Average RIP substrate value of LRARs	0.14	0.4	0	0	0.12	0.32	0	0	0.11	0.41	0	0	0.11	0.36	0	0	0.11	0.34	0.19	0
Average RIP composite value of LRARs	1.37	1.26	0	0	1.41	1.37	0	0	1.44	1.25	0	0	1.45	1.36	0	0	1.45	1.38	1.31	0
Count of genes	31	134	14194	3450	53	72	14034	1722	32	67	14401	1767	37	53	15144	1809	35	58	14534	1713
Gene density per 100 Kb	1.76999	10.317	37.9684	73.9369	2.86243	4.68172	37.3374	36.5159	1.62367	4.30166	37.242	37.8662	1.8876	5.21654	38.0516	37.6762	1.88672	5.75996	38.0016	38.268
Genomic proportion of isochore component affected by RIP (bp)	1.73548e+06	1.07894e+06	85982.6	4199.52	1.83602e+06	1.33274e+06	78932.7	1886.3	1.95035e+06	1.26503e+06	96671.7	2333.22	1.9188e+06	828446	111436	2880.86	1.81167e+06	793779	110913	1342.9
Genomic proportion of all observed RIP (%)	60.22	37.4384	2.19354	0.145721	56.7548	41.0249	2.15534	0.0664121	59.2845	37.3602	3.28376	0.072124	67.5563	28.4165	3.92339	0.101428	66.6536	29.2173	4.08246	0.0494292

## Sheet: Table S8
Table S8: RIP statistics of the core and accessory genomic compartments of the F. circinatum strain investigated in this study.
	Core genomic compartment					Isolate-specific genomic regions (part of accessory compartment)
Description	CMWF567	FFRA	FSOR	FSP34	UG27	CMWF567	FFRA	FSOR	FSP34	UG27
Size of genomic compartment (bp)	39601094	41107336	39700390	39516689	39616517	3912967	3611543	3242143	3090078	3247859
Average GC content of compartment (%)	48.24	48.3	48.3	48.3	48.24	38.18	39.01	38.4	35.94	35.62
RIP affected proportion of genomic compartment (%)	2.27	2.1	2.12	2.09	2.27	36.27	31.23	32.87	45.24	48.48
RIP affected proportion of genomic compartment (bp)	3082425	2840296	2716811	2881899	3235008	3082425	2840296	2716811	2881899	3235008
Count of LRARs	46	40	39	37	41	40	46	39	40	37
Average size of LRARs (bp)	9674.15	9275	9320.51	9202.89	9414.68	12604.6	12103.1	11670.3	15076	16652.4
Average GC Content of LRARs (%)	17.45	17.74	17.73	17.61	17.36	23.28	22.92	24.61	25.26	23.86
Average size of LRARs (bp)	445011	371000	363500	340507	386002	504184	556743	455141	603041	616140
Proportion of all observed RIP (%)	29.1636	30.3931	30.9793	28.6581	27.7988	46.0427	39.7101	39.2259	48.508	48.6726

## Sheet: Table S9
Table S9: Correlation coefficients calculated for percentage RIP (%), count of Transposable elements (TEs) and size (bp) for the dispensable chromosome assemblies of F. circinatum strains investigated in this study1.
	RIP (%)	TE (count)	Size (bp)
RIP (%)	1
TE (count)	0.935071	1
Size (bp)	0.946164	0.842483	1
1See Figure 4.

## Sheet: Table_S10
Table S10: List of genomic regions corresponding to the telomeric regions in F. circinatum isolates investigated in this study.
The list includes regions of chromosome assemblies with a high frequncy of telomeric repeat sequences that show significant evidence of RIP mutations and reduced GC content.
Name1	Size (bp)	RIP product index value2	RIP substrate index value3	RIP composite index value4	GC content (%)	Total count of telomeric repeats
FSP34
1L	60000	1.52	0.42	1.1	27.76	99
1R	50000	1.25	0.83	0.42	36.25	34
2R	40000	1.64	0.41	1.23	26.83	125
3R	15000	1.68	0.42	1.26	28.04	11
3L	25000	1.48	0.45	1.03	27.21	31
4L	30000	1.63	0.43	1.2	27.04	66
4R	25000	1.04	0.73	0.32	34.89	27
5R	80000	1.79	0.39	1.4	28.66	192
6L	47000	1.64	0.48	1.16	28.5	124
6R	11000	1.44	0.19	1.25	17.53	32
7L	40000	1.4	0.51	0.89	28.87	56
7R	27000	1.58	0.58	1	31.46	71
8L	72000	1.7	0.56	1.15	31.5	143
8R	78500	1.23	0.57	0.67	28.89	44
9L	30000	1.32	0.83	0.48	38.03	136
9R	60000	1.65	0.51	1.14	29.99	114
10L	31500	1.62	0.57	1.05	33.99	88
10R	100000	1.28	0.73	0.56	34.06	167
11L	60000	1.42	0.61	0.81	32.27	110
11R	31500	1.59	0.62	0.97	34.63	92
12L	10000	1.59	0.13	1.47	17.88	28
12R	11000	1.57	0.13	1.44	17.68	25
FSOR
1L	26000	1.73	0.36	1.37	26.84	66
1R	35000	1.7	0.53	1.17	31.62	46
2R	28500	1.66	0.46	1.2	28.69	49
3L	13500	1.7	0.44	1.26	29.27	35
3R	9000	1.52	0.32	1.21	23.48	37
4L	16500	1.62	0.36	1.25	24.88	30
4R	50000	1.69	0.54	1.14	31.75	92
5L	8000	1.74	0.3	1.44	26.76	25
5R	22000	1.59	0.37	1.21	27.23	68
6L	90000	1.22	0.69	0.53	33.81	129
6R	14000	1.84	0.36	1.48	28.75	67
7L	25000	1.51	0.37	1.13	26.31	38
7R	39000	1.63	0.33	1.29	24.48	82
8L	28000	1.58	0.27	1.31	25.01	82
8R	50500	1.7	0.49	1.21	29.97	119
9L	5500	1.63	0.06	1.57	15.98	4
9R	13500	1.8	0.53	1.27	32.21	39
10L	24500	1.79	0.34	1.45	26.42	55
10R	27500	1.67	0.75	0.92	36.85	63
11L	88500	1.37	0.69	0.68	33.84	185
11R	40000	1.7	0.53	1.17	31.06	70
12L	50500	1.41	0.62	0.79	32.86	85
12R	37500	1.35	0.71	0.63	32.77	43
FFRA
1L	32500	1.5	-0.57	0.92	30.75	73
1R	40000	1.57	0.53	1.03	31.11	48
2R	61500	1.55	0.39	1.16	26.16	97
3L	22500	1.22	0.81	0.42	39.07	34
3R	30000	1.19	0.69	0.5	33.13	36
4L	25500	1.28	0.67	0.61	34.02	38
4R	60000	1.44	0.72	0.72	36.02	94
5L	40500	1.8	0.45	1.35	29.75	115
5R	16500	1.76	0.38	1.39	26.94	72
6L	6500	1.6	0.17	1.49	19.53	15
6R	49500	1.52	0.32	1.2	23.92	39
7L	35000	1.26	0.63	0.63	31.95	29
7R	11000	1.59	0.11	1.48	17.63	22
8L	25000	1.77	0.41	1.35	28.62	52
8R	5500	1.59	0.04	1.54	16.64	70
9L	20000	1.83	0.44	1.39	29.67	75
9R	14000	1.67	0.65	1.02	34.82	70
10L	27000	1.75	0.37	1.37	27.14	54
10R	40000	1.26	0.56	0.7	31.03	108
11L	42500	1.25	0.92	0.33	39.66	78
11R	50000	1.64	0.53	1.12	29.9	57
12L	12500	1.75	0.46	1.28	29.75	51
12R	24000	1.57	0.67	0.9	22.19	87
UG27
1L	40000	1.67	0.37	1.31	25.08	129
1R	50000	1.66	0.46	1.2	27.87	126
2R	85000	1.51	0.47	1.05	27.61	142
3L	54000	1.39	0.52	0.82	30.57	85
3R	44000	1.01	0.92	0.09	38.33	91
4L	12000	1.6	0.19	1.45	20.82	16
4R	22500	1.84	0.18	1.65	24.22	86
5L	77000	1.77	0.47	1.3	29.72	222
5R	34500	1.68	0.36	1.32	26.41	72
6L	18000	1.6	0.43	1.16	28.04	49
6R	29000	1.26	0.62	0.64	30.76	32
7L	18500	1.43	0.41	1.02	26.5	39
7R	76000	1.68	0.28	1.39	24.56	184
8L	31500	1.68	0.37	1.31	25.95	111
8R	18500	1.43	0.29	1.14	19.97	14
9L	27000	1.73	0.46	1.27	29.77	67
9R	33500	1.64	0.24	1.4	22.89	96
10L	26000	1.76	0.45	1.31	30.33	100
10R	16500	2.25	0.32	1.92	26.84	83
11L	86500	1.62	0.47	1.16	29.99	201
11R	42500	1.71	0.37	1.34	27.32	132
12L	53500	1.71	0.35	1.36	26.3	138
12R	50500	1.73	0.33	1.4	27.06	168
CMWF567
1L	9500	1.65	0.33	1.33	24.73	38
1R	20000	1.69	0.43	1.26	27.76	170
2R	20000	1.43	0.56	0.86	29.57	89
3L	24000	1.77	0.34	1.43	26.14	65
3R	26000	1.64	0.4	1.24	26.77	75
4L	26000	1.65	0.28	1.37	24.24	54
4R	12000	1.77	0.33	1.44	27.07	76
5L	35000	1.76	0.41	1.35	28.4	70
5R	23000	1.7	0.3	1.4	26.2	81
6L	23000	1.63	0.35	1.28	24.49	54
6R	18000	1.8	0.43	1.4	26.1	81
7L	23500	1.79	0.53	1.26	24.49	64
7R	55000	1.67	0.35	1.31	25.19	150
8L	33000	1.63	0.31	1.32	24.88	61
8R	23500	1.9	0.45	1.44	31.86	81
9L	10000	1.6	0.05	1.55	15.09	4
9R	33000	1.79	0.37	1.43	28.37	136
10L	8000	1.71	0.64	1.09	33.44	27
10R	11500	1.75	0.57	1.19	32.47	63
11L	39000	1.44	0.74	0.7	34.86	89
11R	13500	1.77	0.28	1.49	24.01	72
12L	50000	1.5	0.26	1.23	20.86	85
12R	22000	1.77	0.43	1.34	29.88	77
1L= Left telomere, R= Right telomere.
2Product index value indicating RIP [TpA/ ApT]: x > 1.1.
3Substrate index value indicating RIP [CpA +TpG/ ApC + GpT]: 0.75 ≥ x.
4Composite index value indicating RIP [(TpA/ ApT) – (CpA + TpG/ ApC + GpT)]: x > 0.01.

[truncated: 6 more sheets: Table S_11, TableS12, Table S13, Table_S14, Table _S15, Table S16]
