# Supplementary material for: Repeat-Induced Point Mutations (RIP) Drives the Formation of Distinct Sub-Genomic Compartments in Fusarium Circinatum
Source: Preprints.org preprint supplement (doi:10.20944/preprints202012.0697.v1), 2020-12-28
Supplement: Supplementary file 1 [file supplementary]

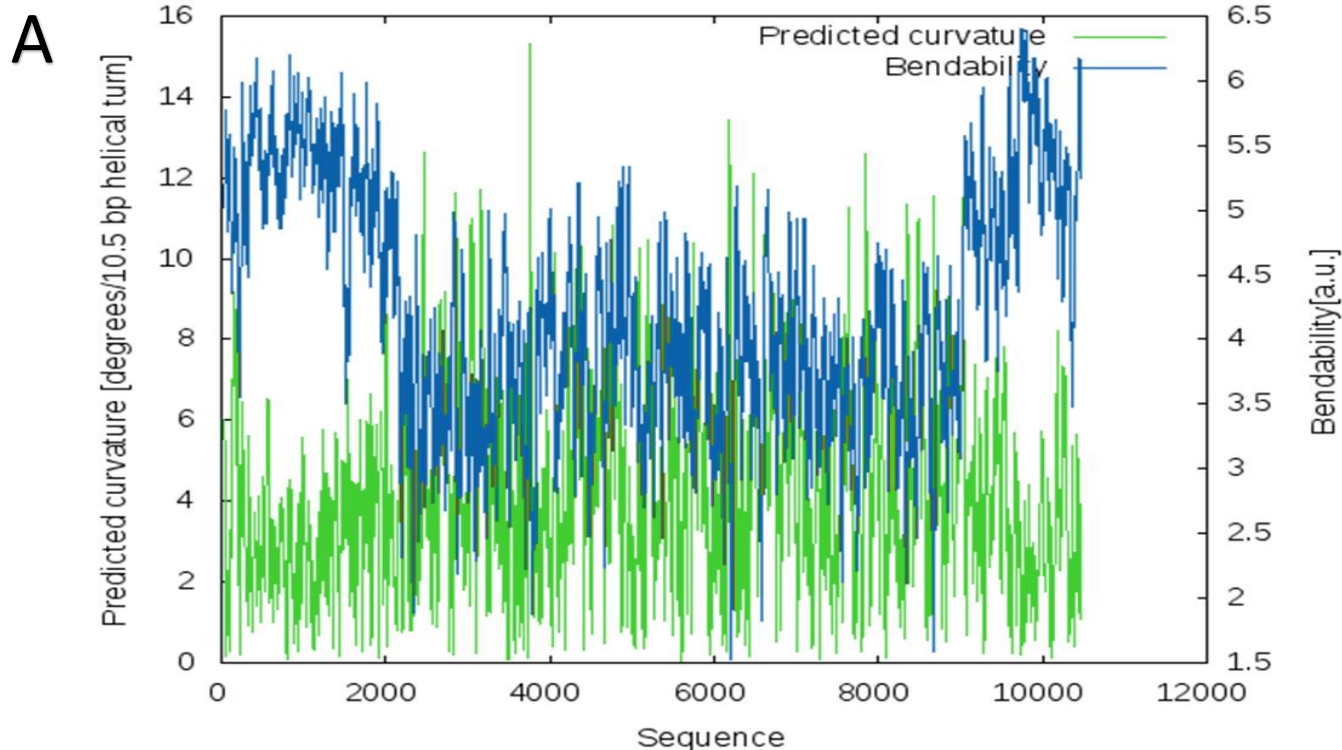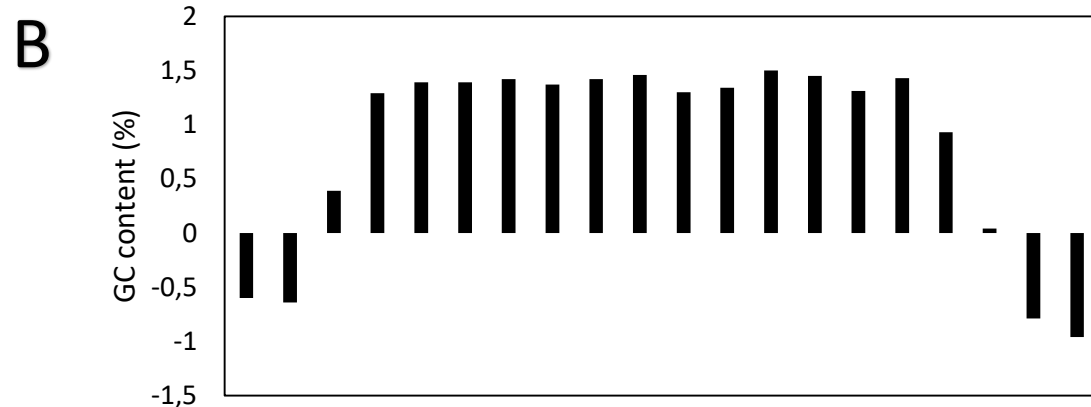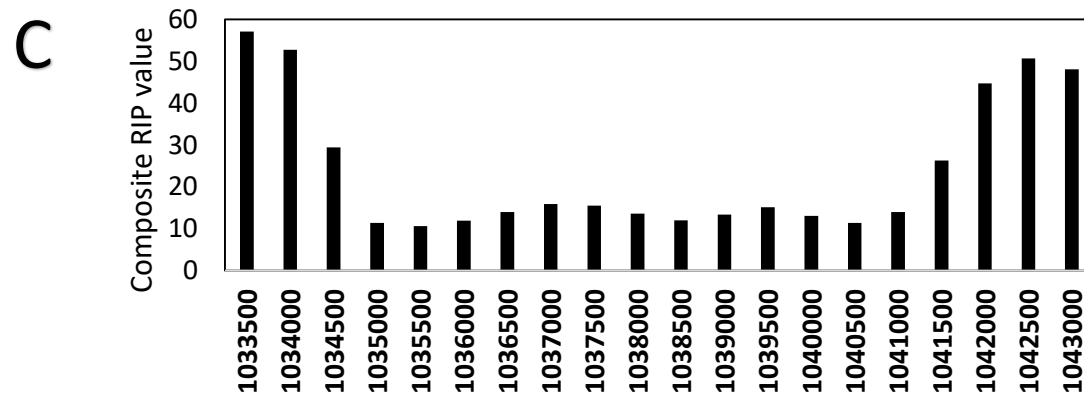

**Figure S8:** Summary of physical features of the LRAR at locus 1 035 000-1 042 500 bp on chromosome 1 of FSP34, relative to its RIP mutation and GC content. (A) Line chart depicting changes in predicted curvature (green) and bendability (blue). (B) Bar chart illustrating changes in GC content. (C) Bar chart illustrating changes in RIP composite index values. Values above 0 indicate RIP.
