# Supplementary material for: Repeat-Induced Point Mutations (RIP) Drives the Formation of Distinct Sub-Genomic Compartments in Fusarium Circinatum
Source: Preprints.org preprint supplement (doi:10.20944/preprints202012.0697.v1), 2020-12-28
Supplement: Supplementary file 2 [file supplementary]

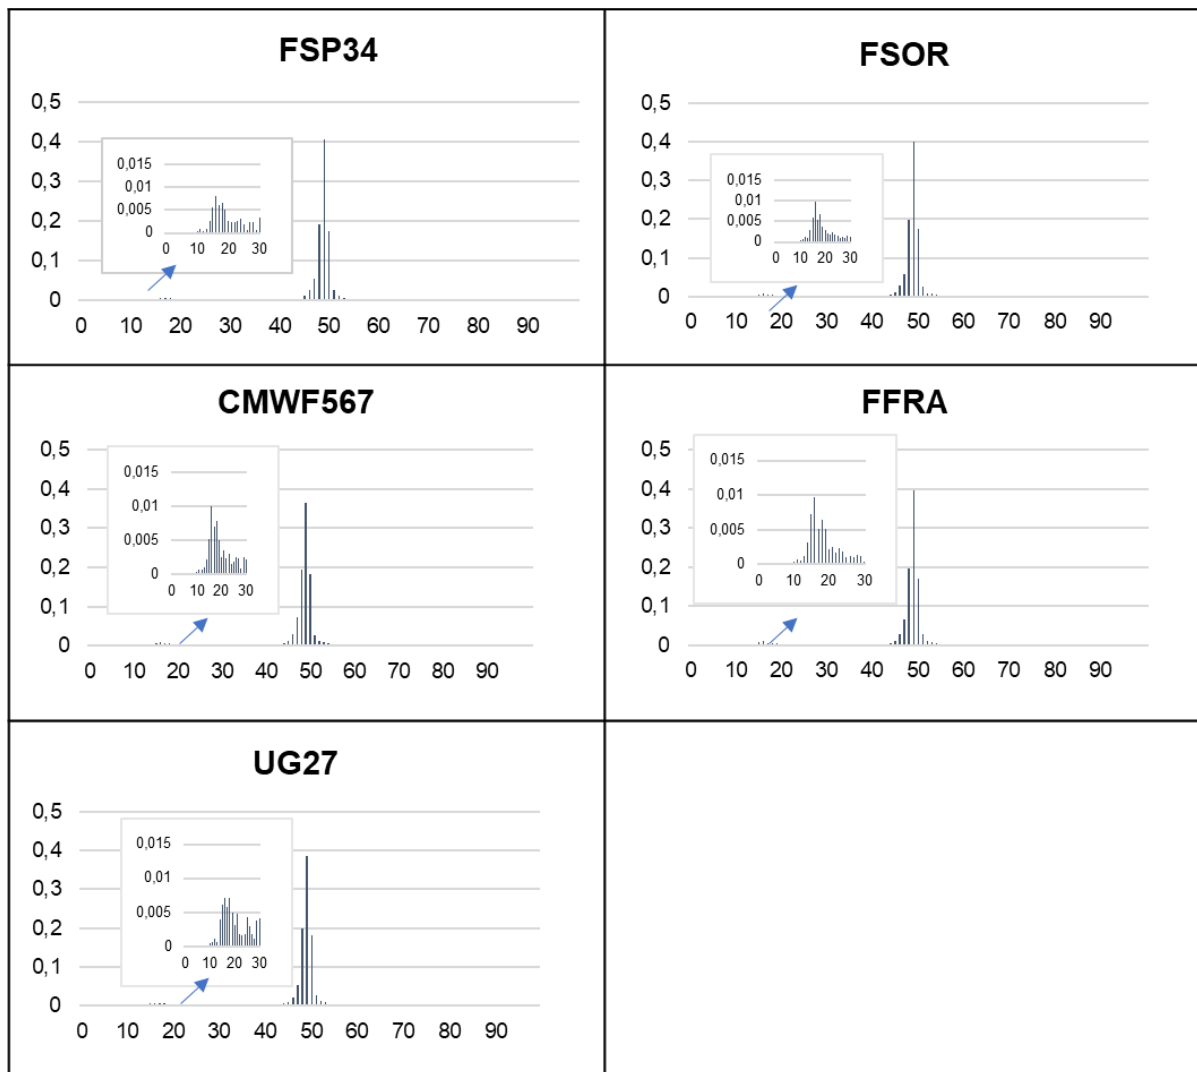

**Figure S4.** Frequency distribution of GC content of each of *Fusarium circinatum* strain investigated in this study. The x-axis indicates percentage GC content and the y-axis shows the proportion of the genome at a given GC content. The y-axis for the proportion of the genome containing the secondary peak has been enlarged for each of the genome assemblies investigated.
