# Supplementary material for: Repeat-Induced Point Mutations (RIP) Drives the Formation of Distinct Sub-Genomic Compartments in Fusarium Circinatum
Source: Preprints.org preprint supplement (doi:10.20944/preprints202012.0697.v1), 2020-12-28
Supplement: Supplementary file 4 [file supplementary]

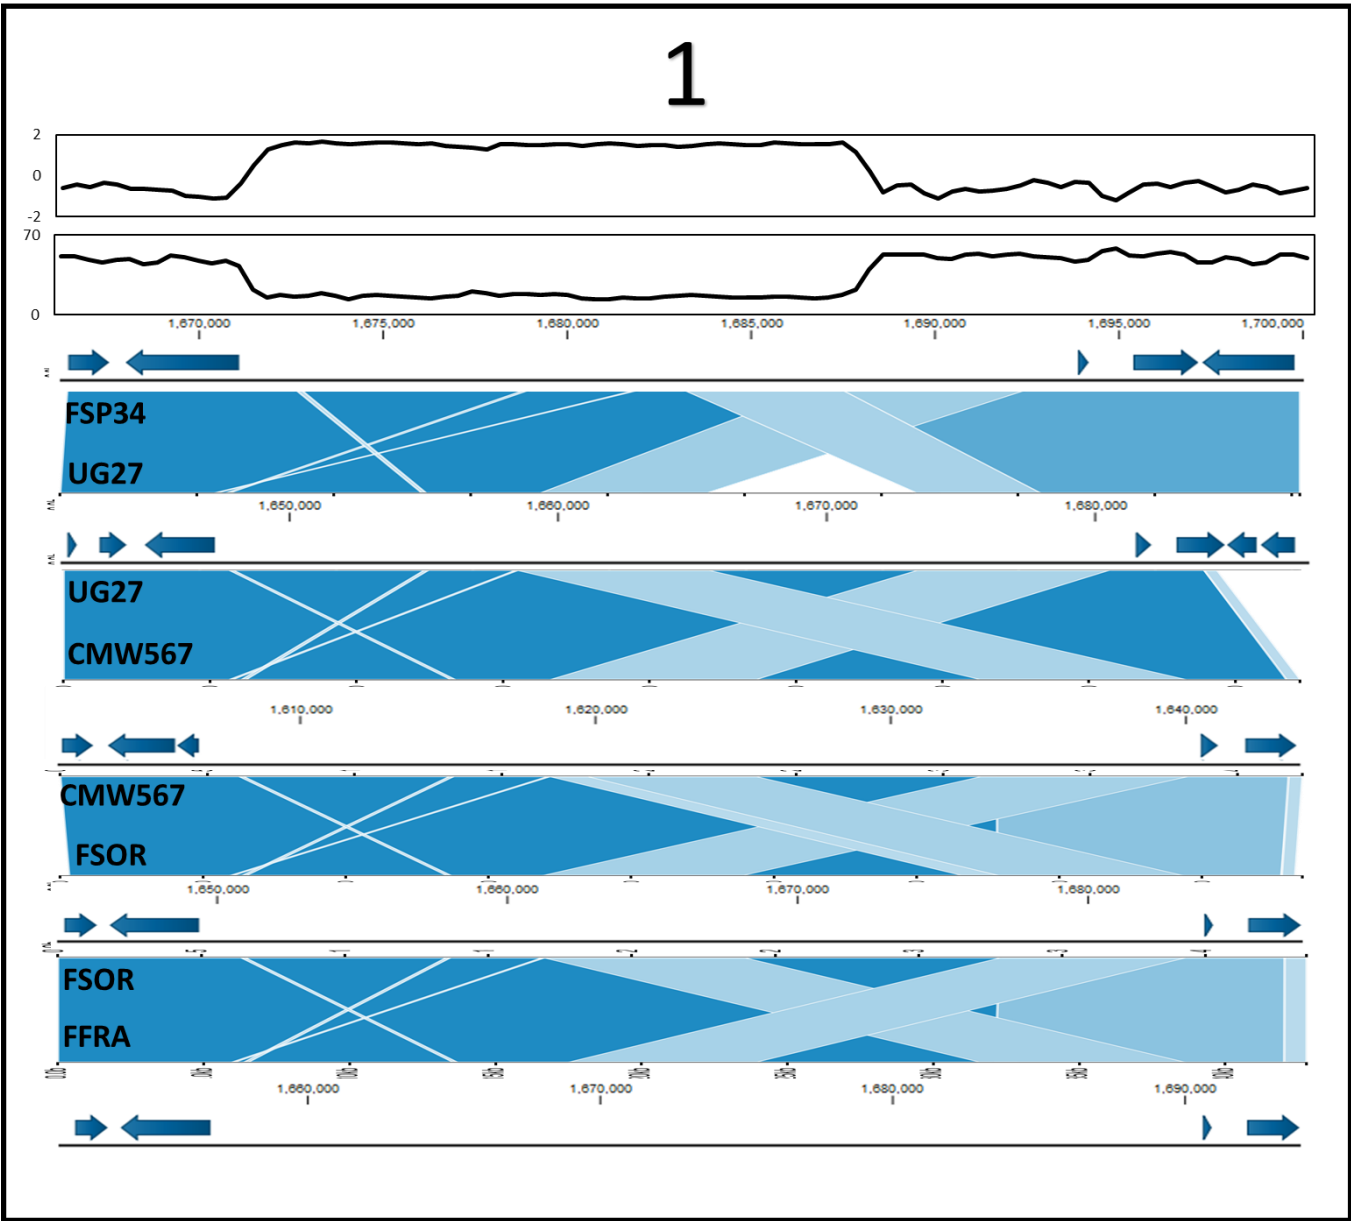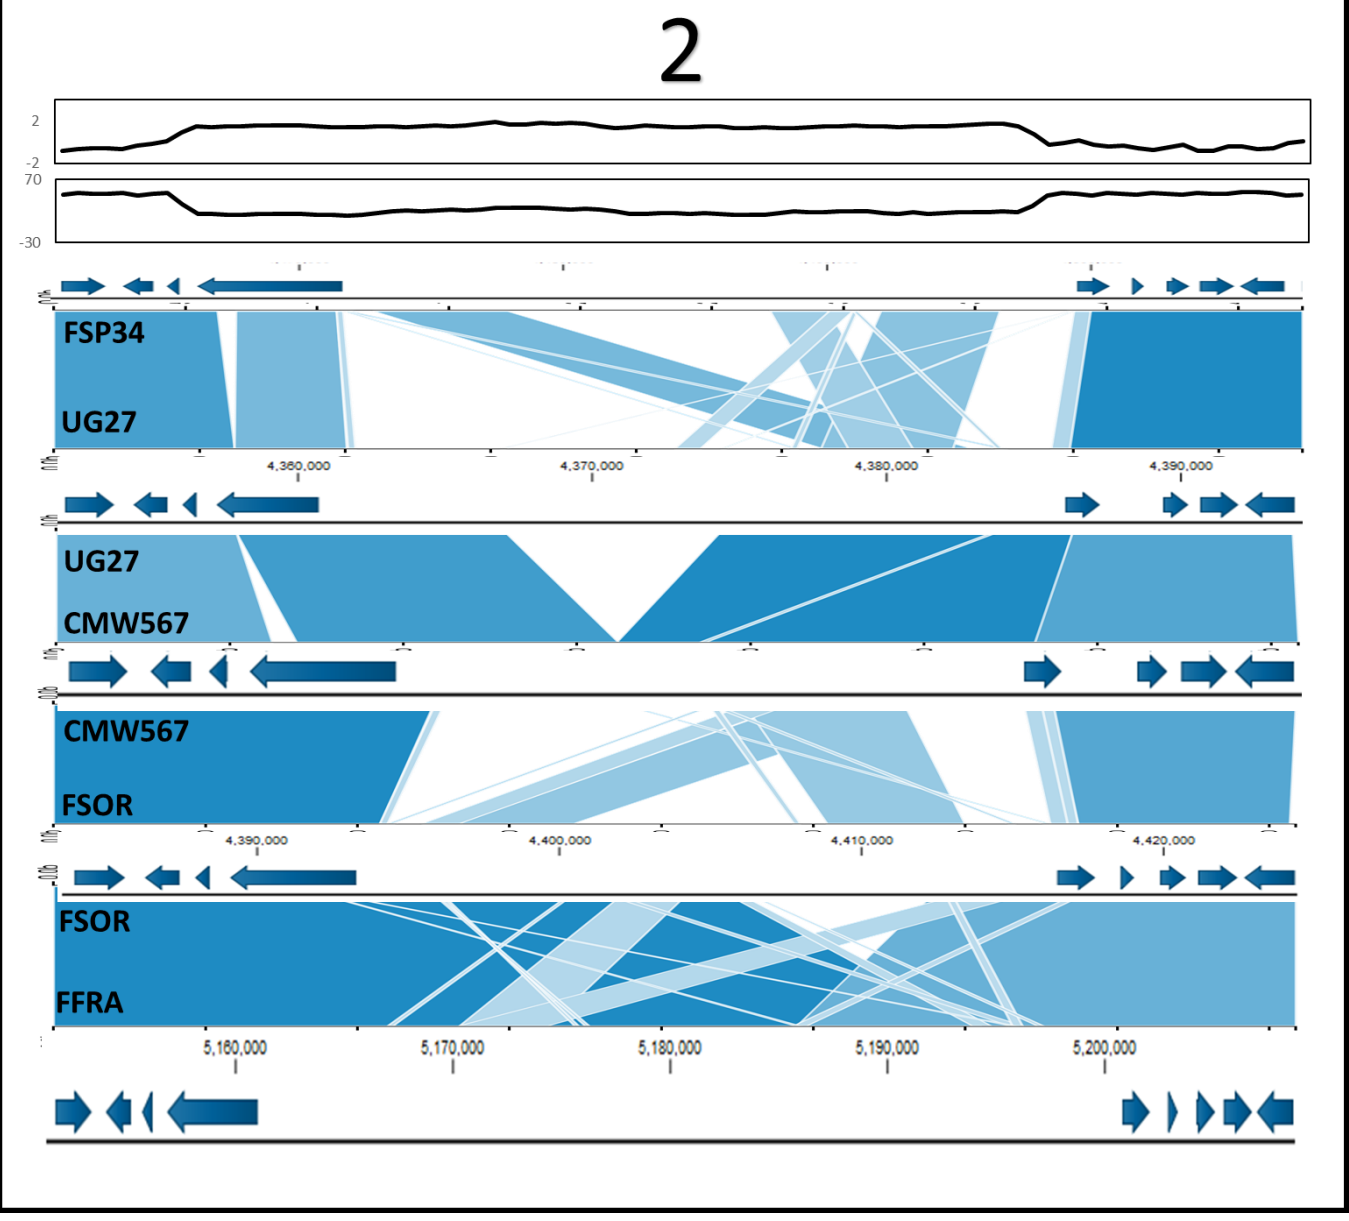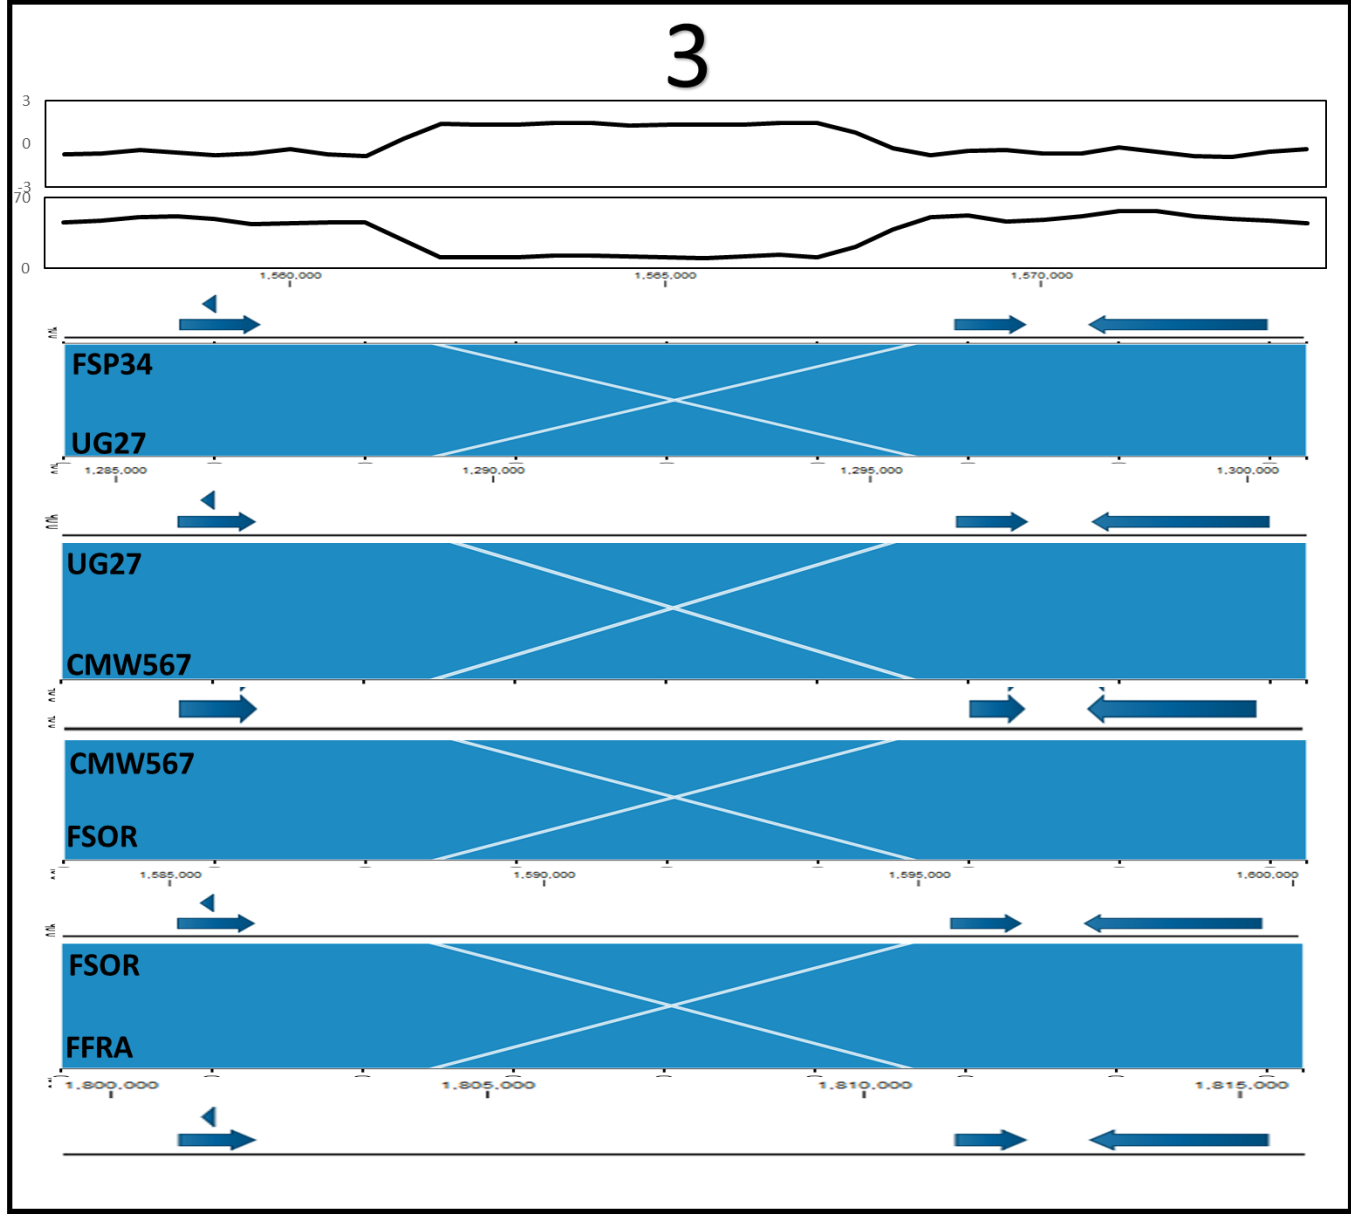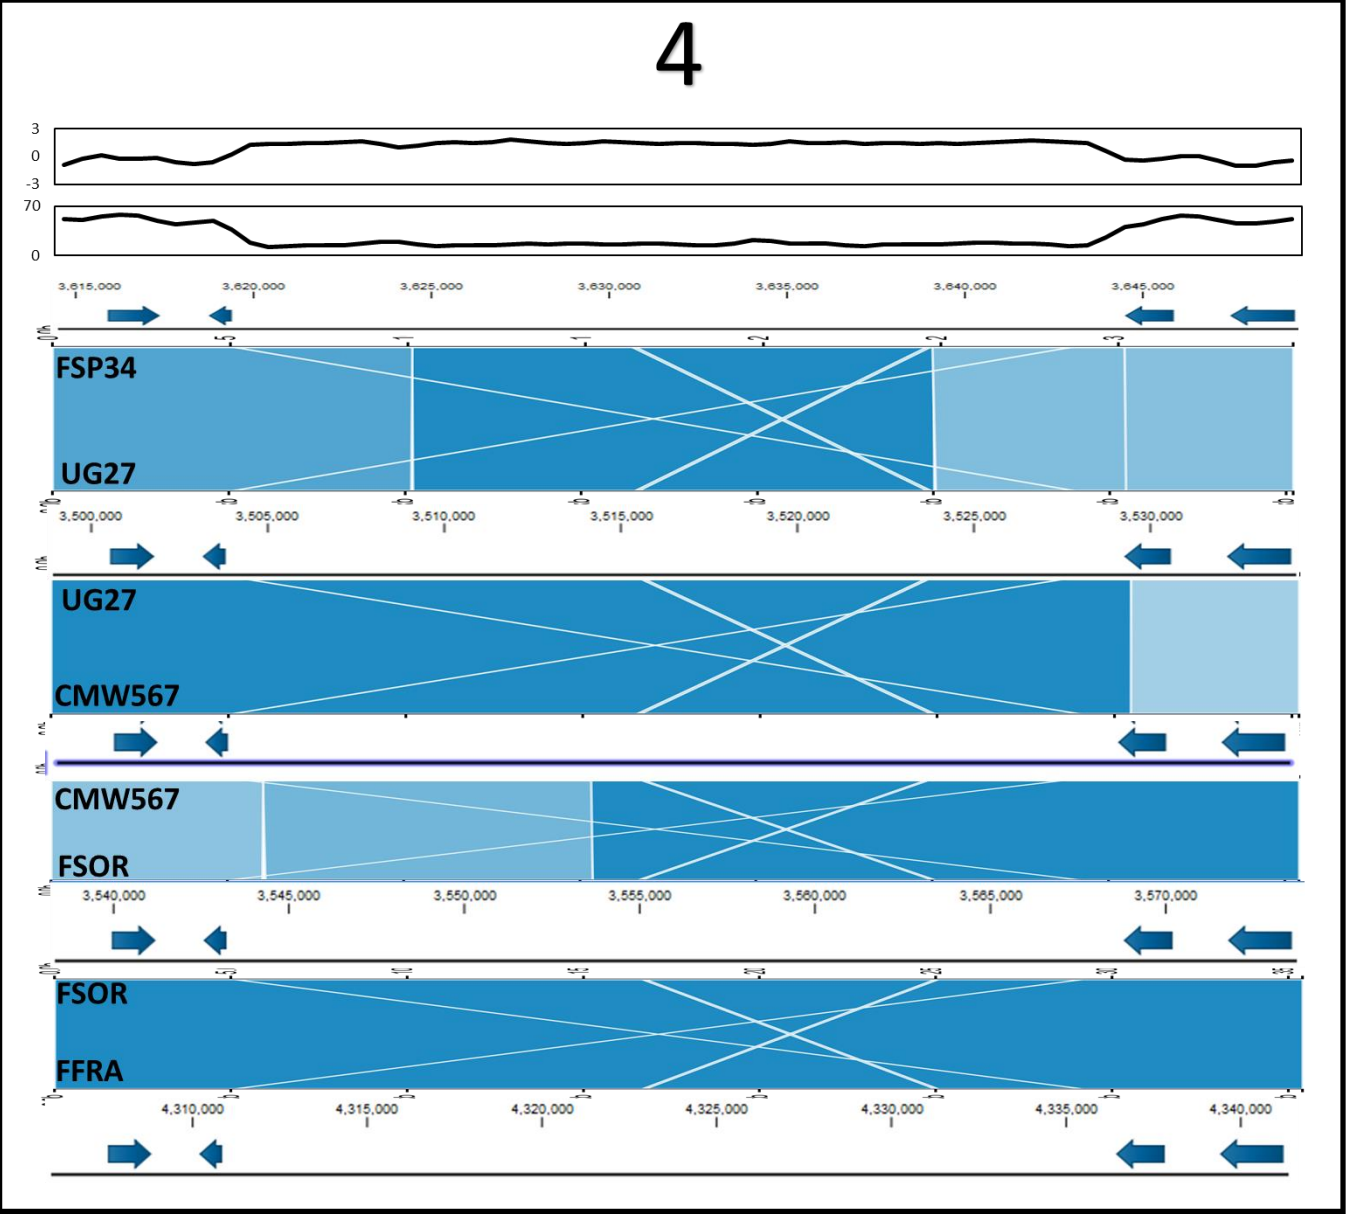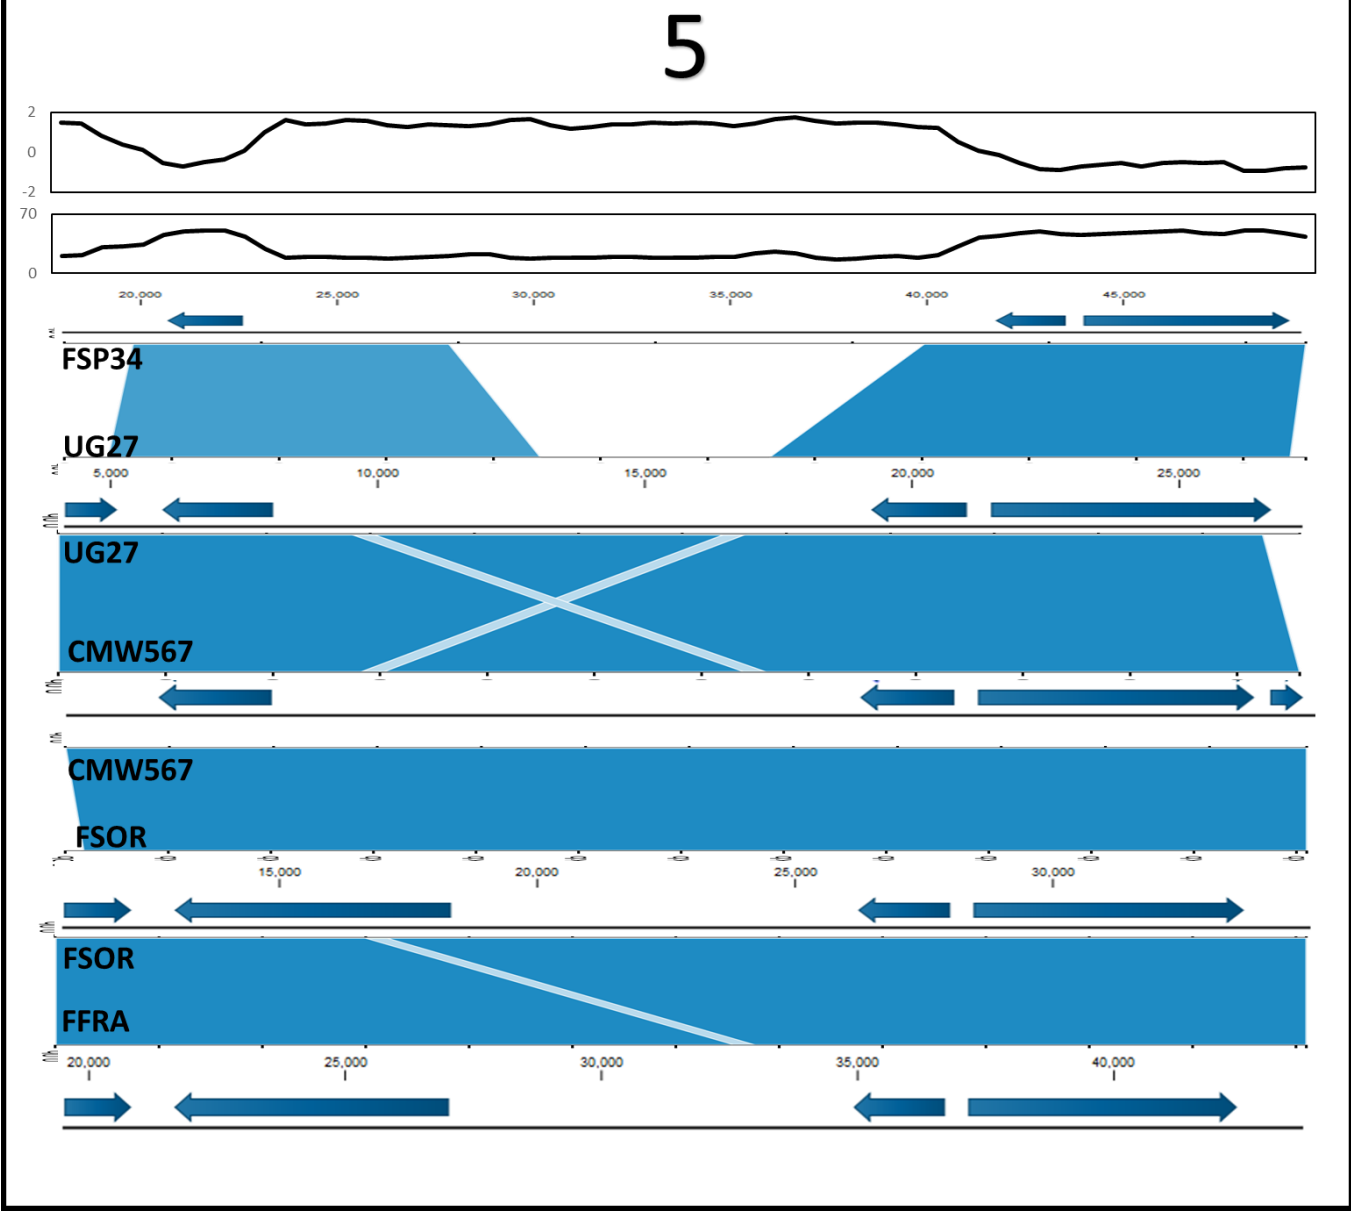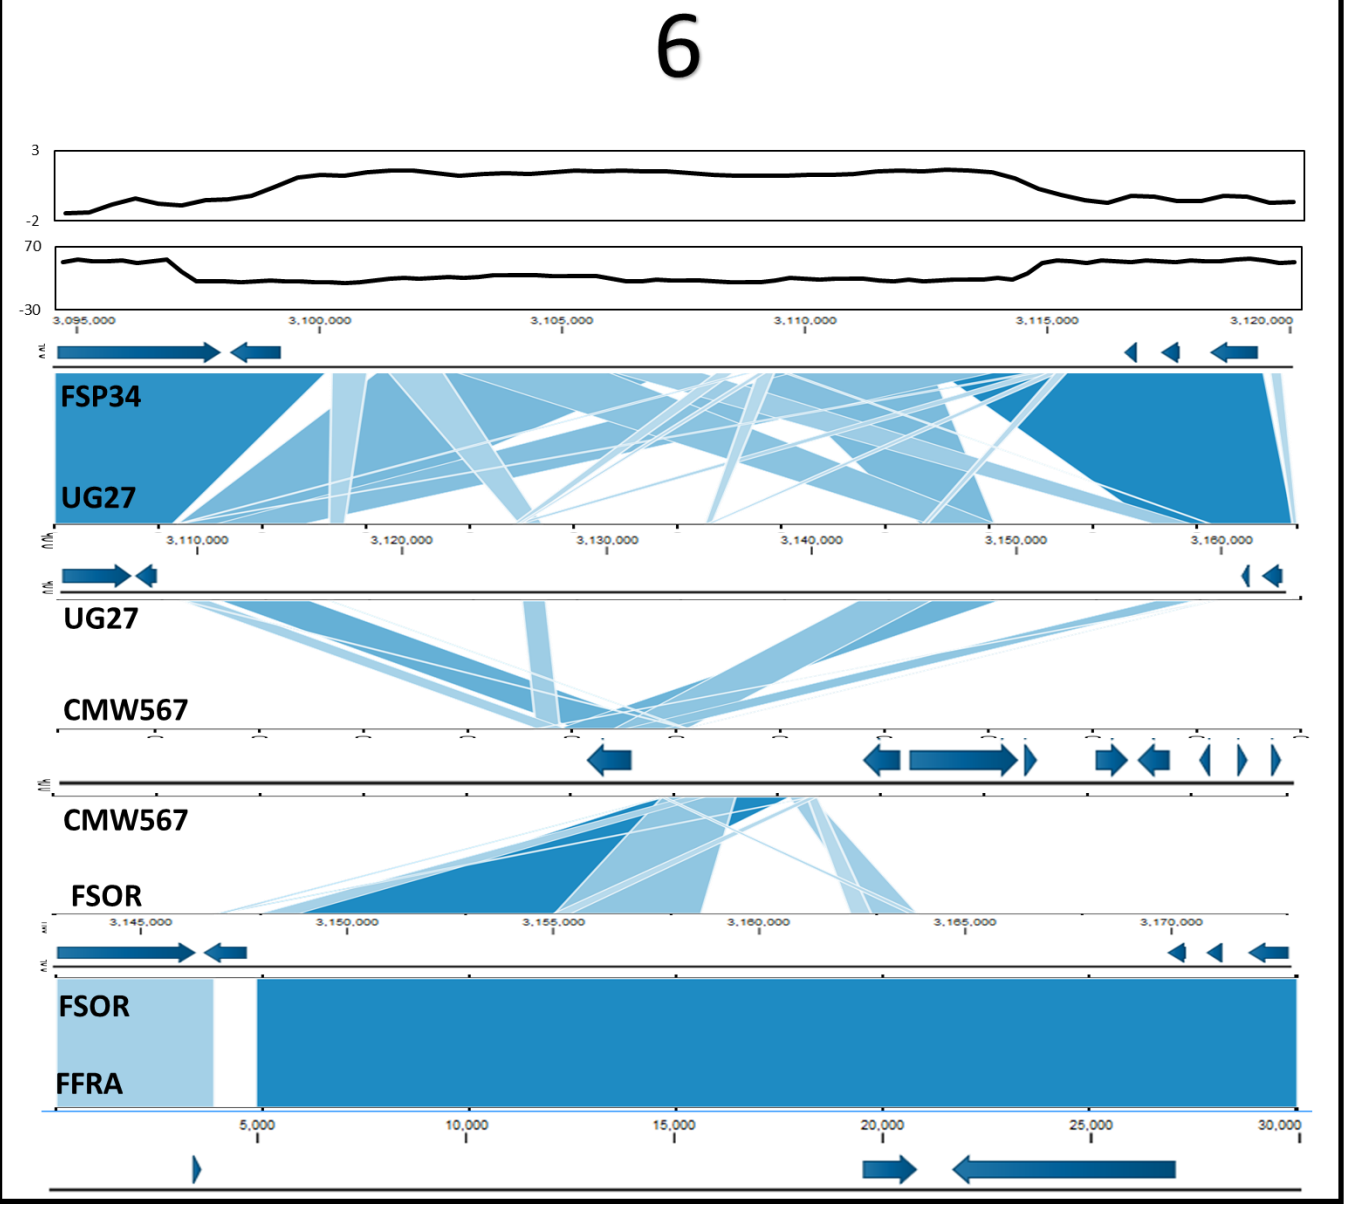

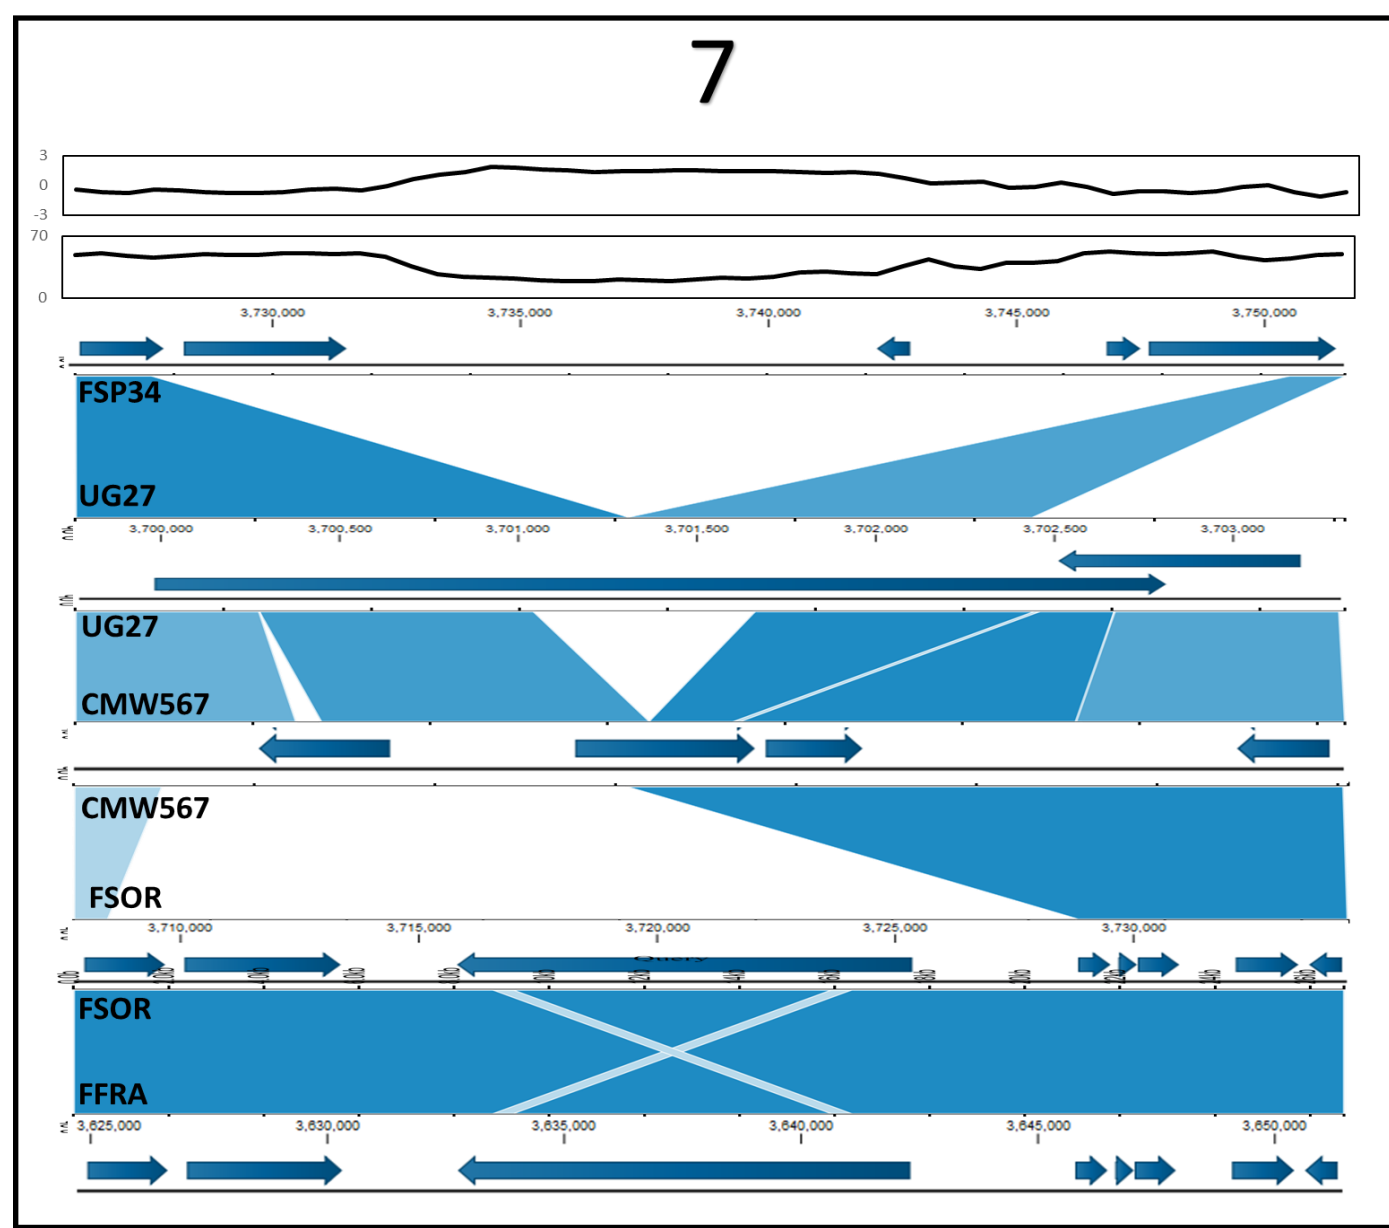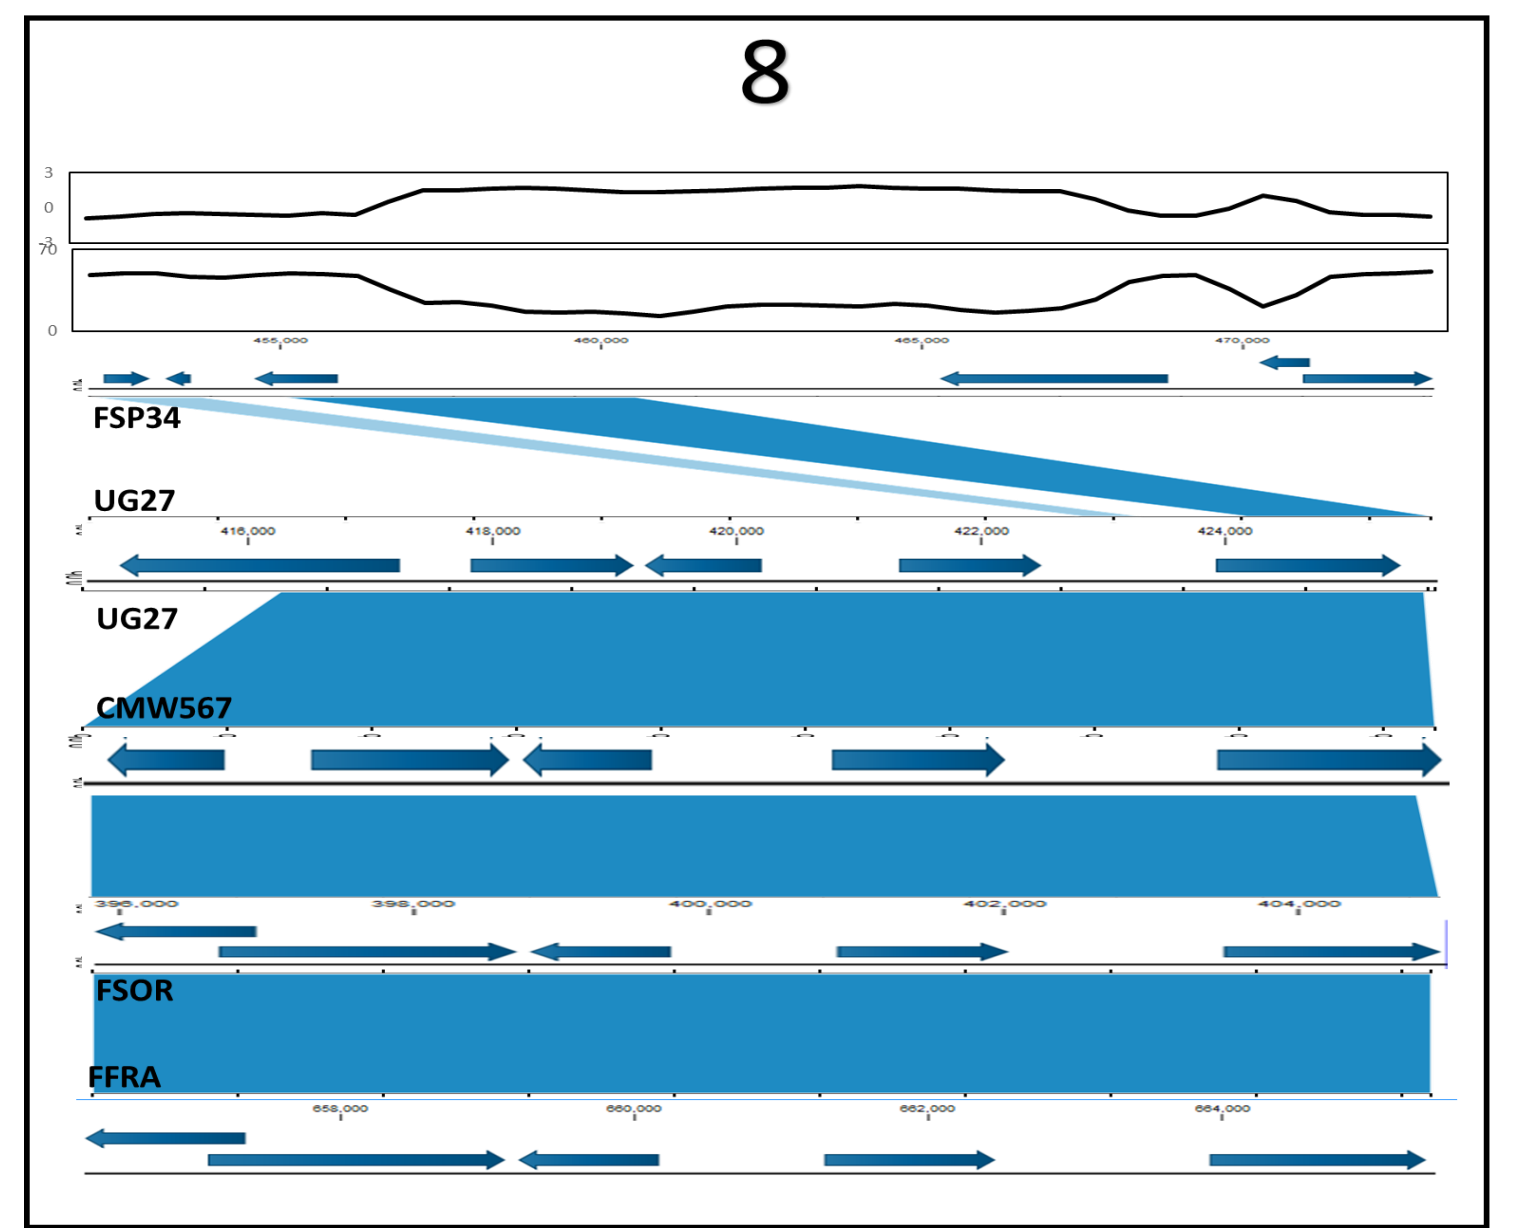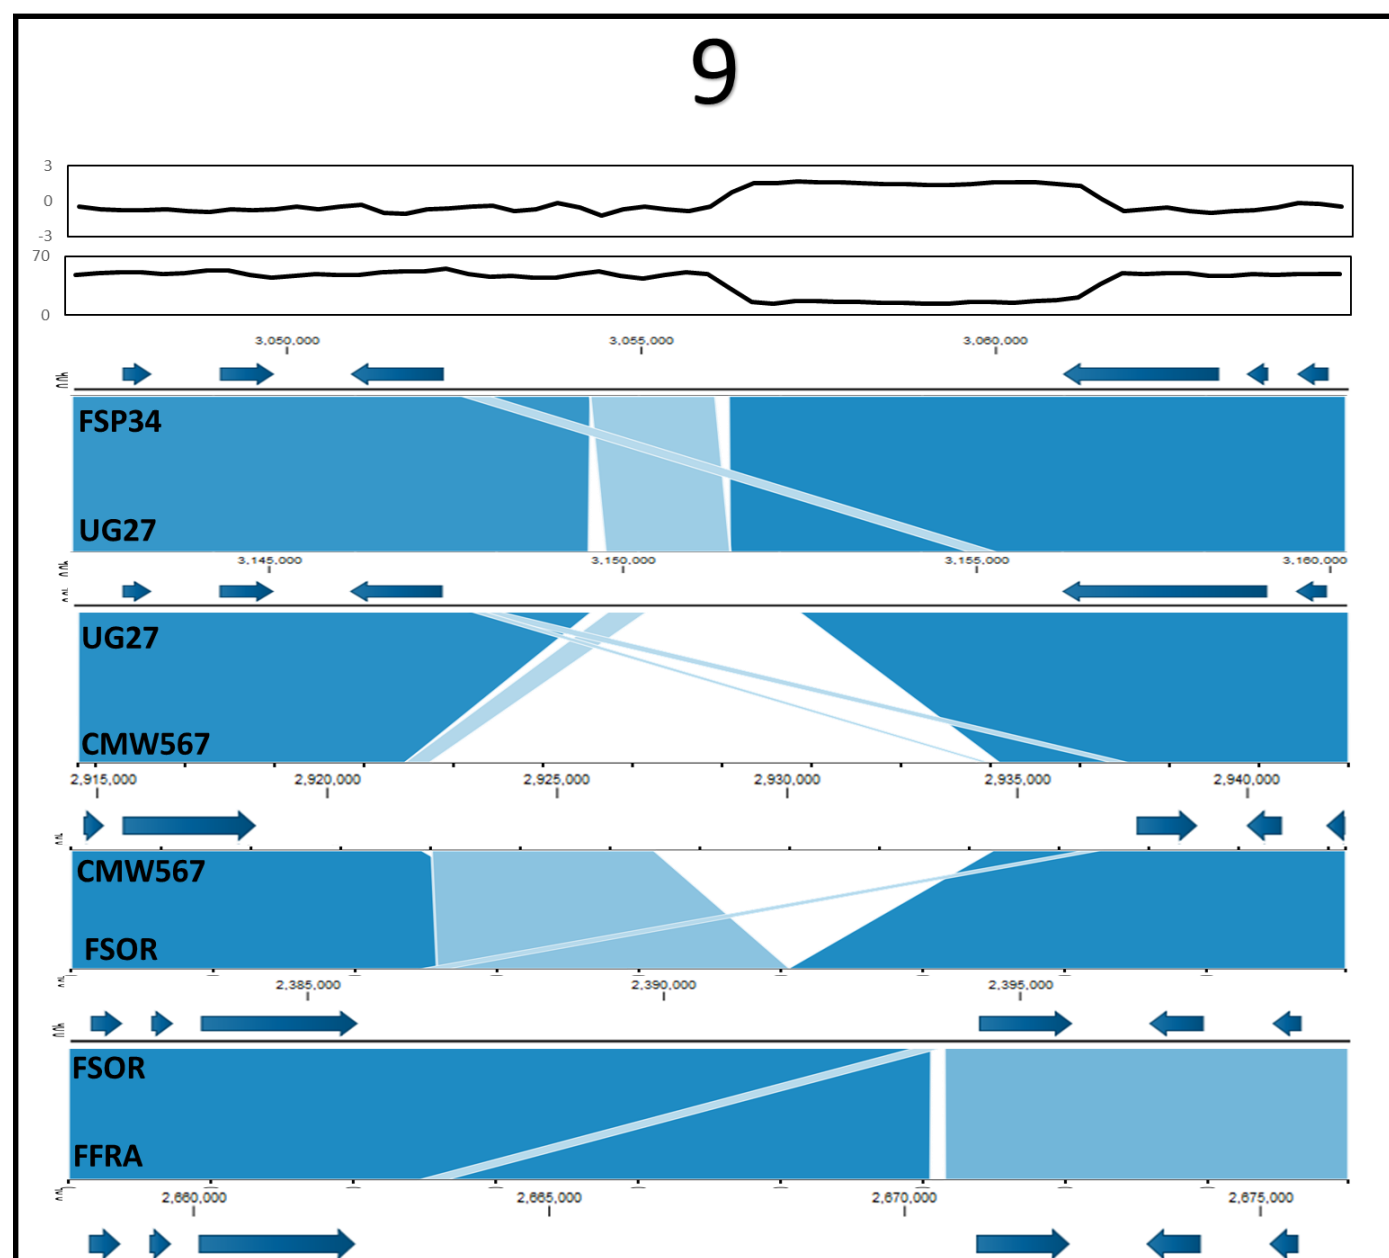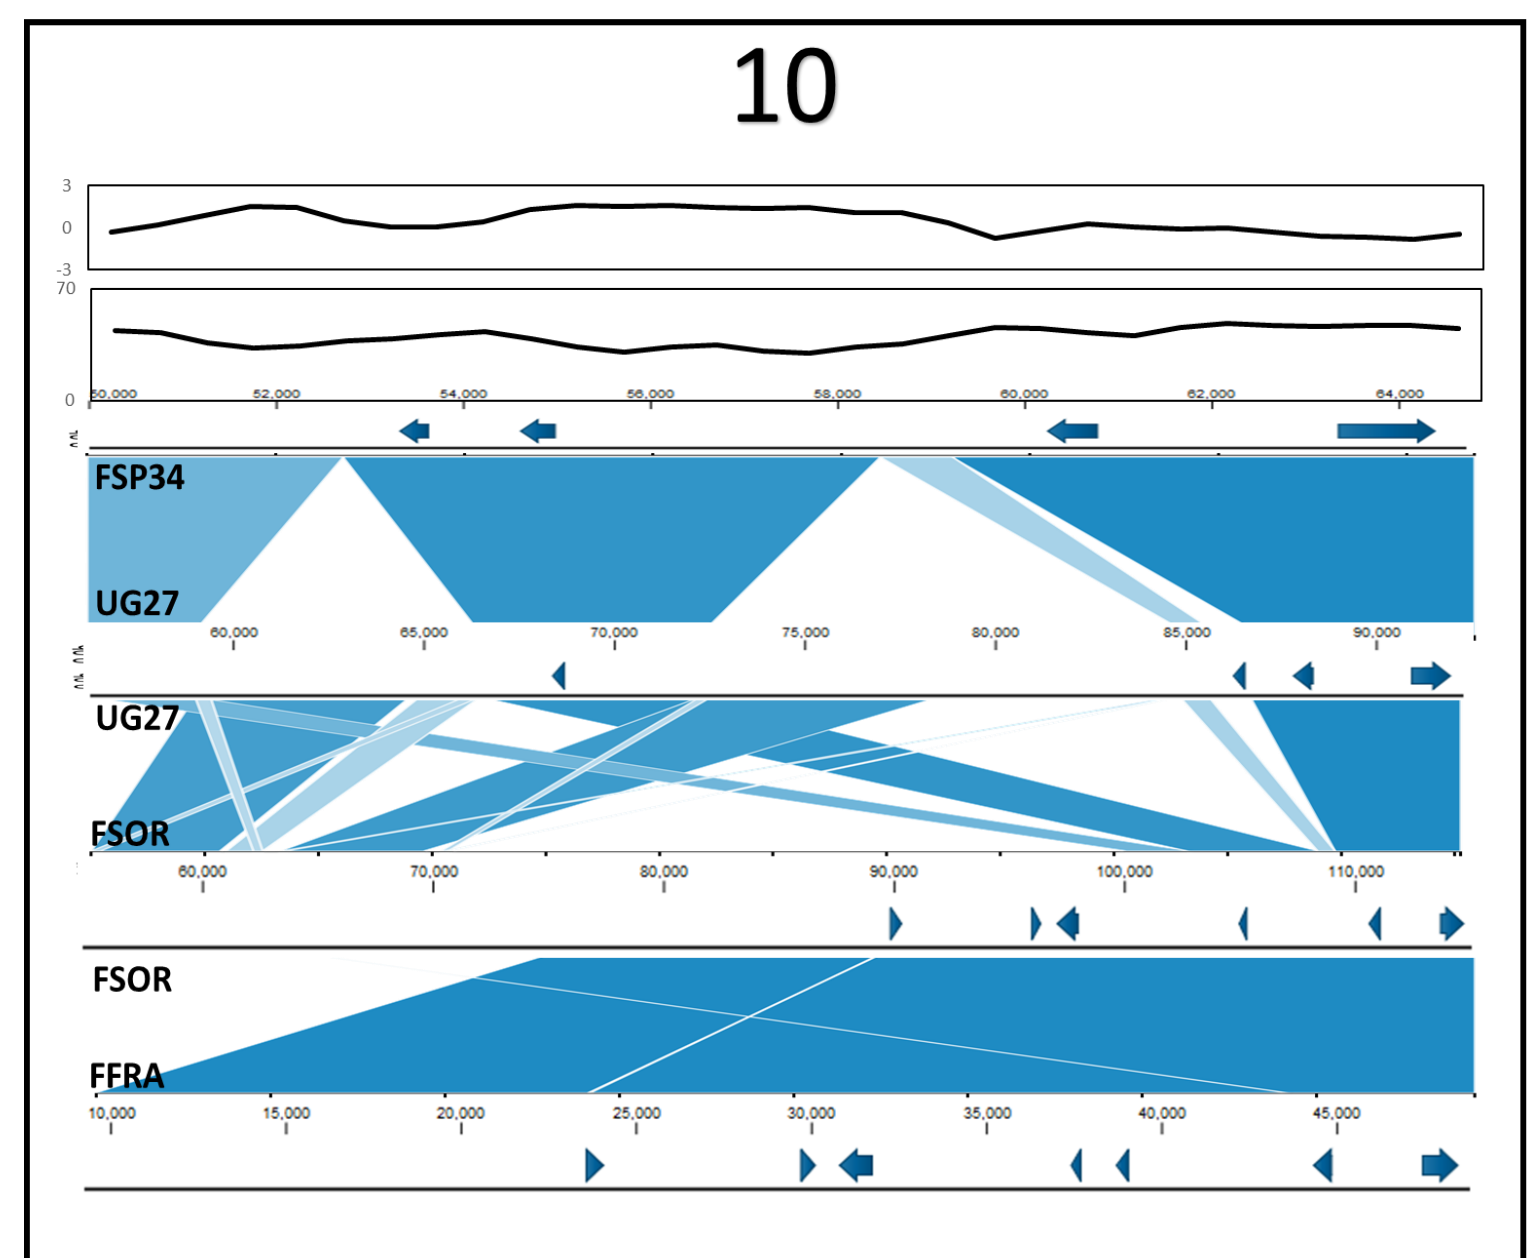

**Figure S7:** Illustration of changes in RIP, GC content, gene content and nucleotide similarity in 10 randomly selected LRARs and neighbouring genomic regions of FSP34, and comparison with homologous regions in other isolates of *F. circinatum*. The top panels illustrate changes in RIP composite index values (values above 0 indicate RIP), the second panel illustrates changes in GC content (%). Below synteny plots based on NCBI pairwise alignments (visualized using Kablamo software) for homologous regions for each isolate investigated in this study (UG27, CMWF567, FSOR, FFRA).
