# Supplementary material for: Repeat-Induced Point Mutations (RIP) Drives the Formation of Distinct Sub-Genomic Compartments in Fusarium Circinatum
Source: Preprints.org preprint supplement (doi:10.20944/preprints202012.0697.v1), 2020-12-28

**Figure S3:** Genomic location of effector genes investigated in this study in relation to the genetic features of the chromosome assemblies of *Fusarium circinatum* (FSP34) [10]. (A) Graph depicts the distribution of TEs associated repeated sequences (larger than 100 base pairs [bp]) across the length of the chromosome, (calculated using a 10Kb window and 5Kb increments) window. (B) Line chart depicts the changes in RIP composite index values across the length of chromosome using a 1000 bp window and increments of 500 bp. Values above 0 indicate RIP. (C) Cluster line chart depicts the changes in RIP product (blue) and substrate (orange) index values across the length of chromosome using a 1000 bp window and increments of 500 bp. RIP product index values above 1.1 and RIP substrate index values below 0.75 indicate RIP. (D) Chart depicts the changes in GC content calculated using CLC software at 1000bp and 500bp increments. Arrows and stars denote the positions of the effector genes investigated.

Chromosome 3

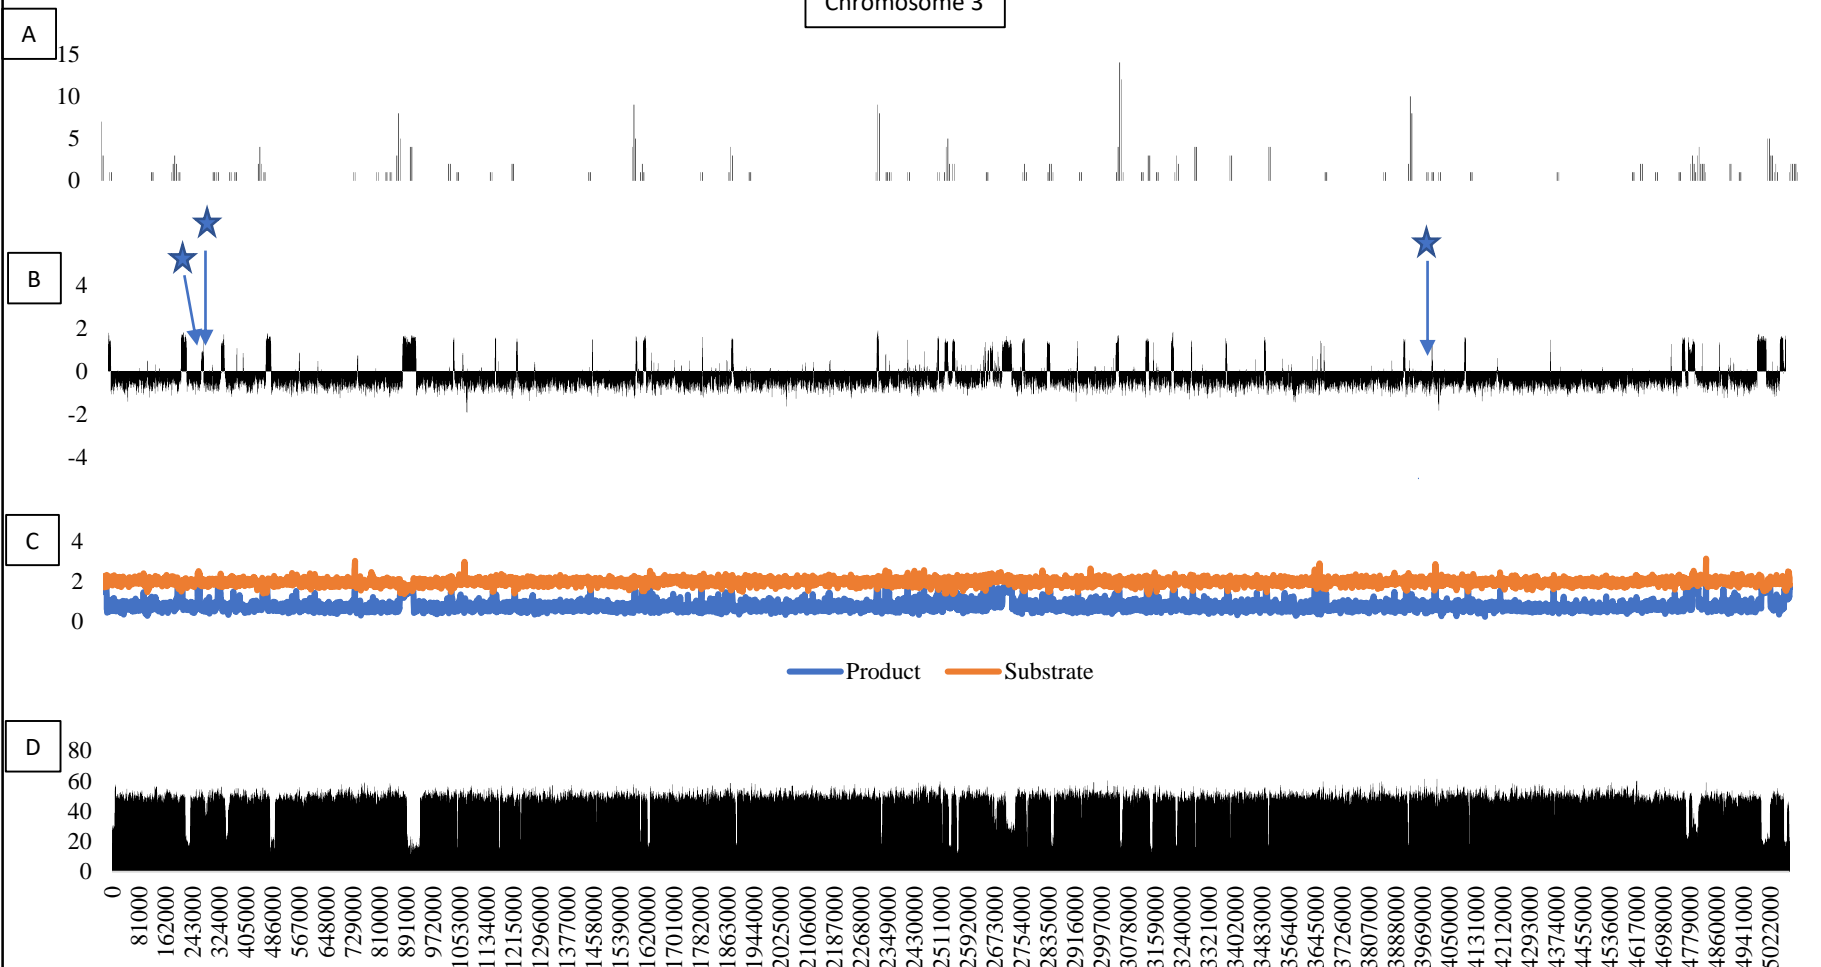

Chromosome 4

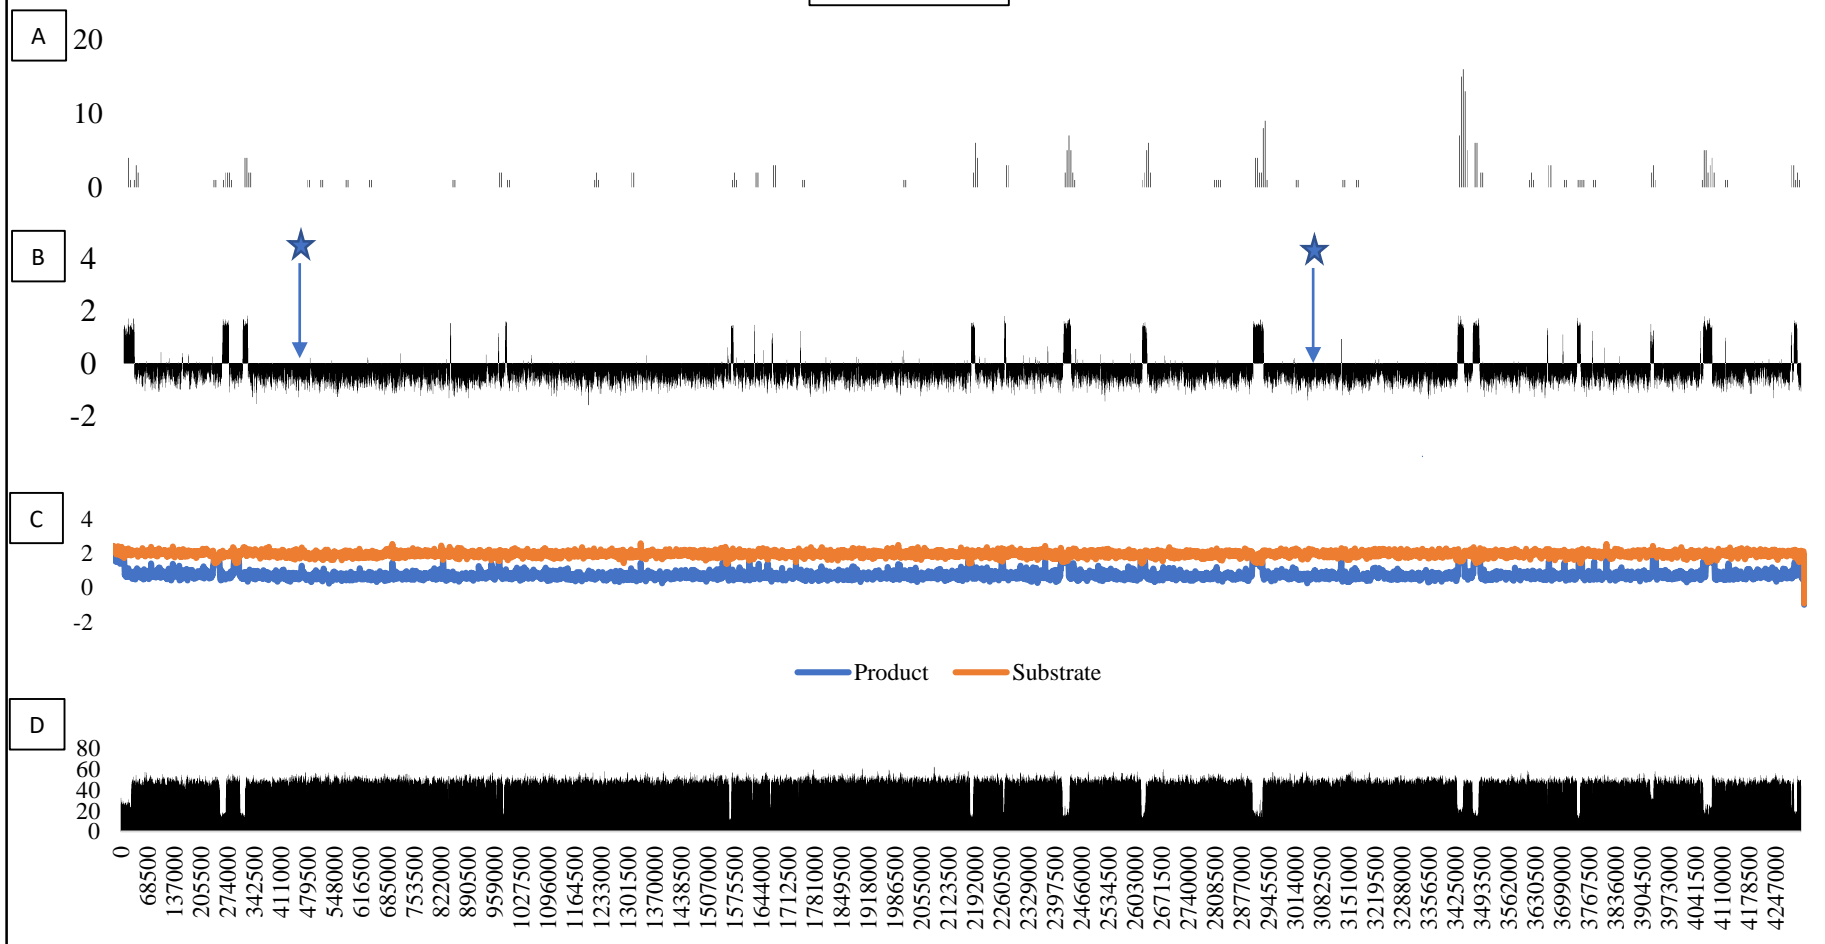

Chromosome 7

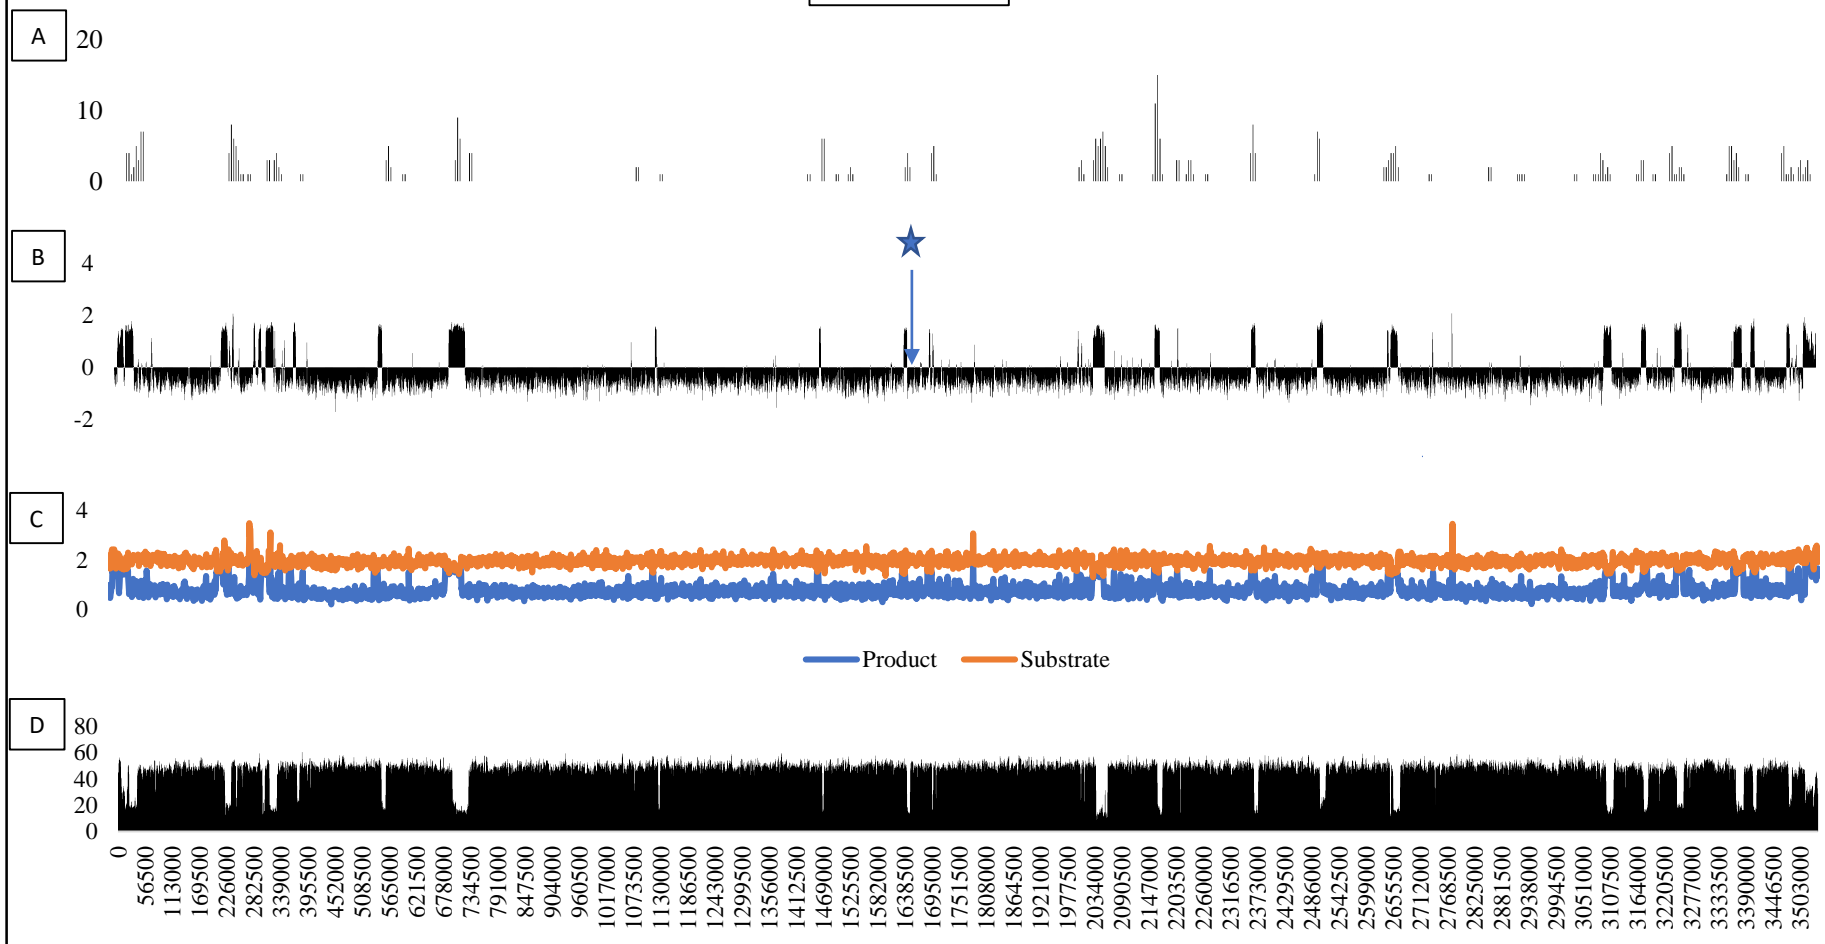

Chromosome 8

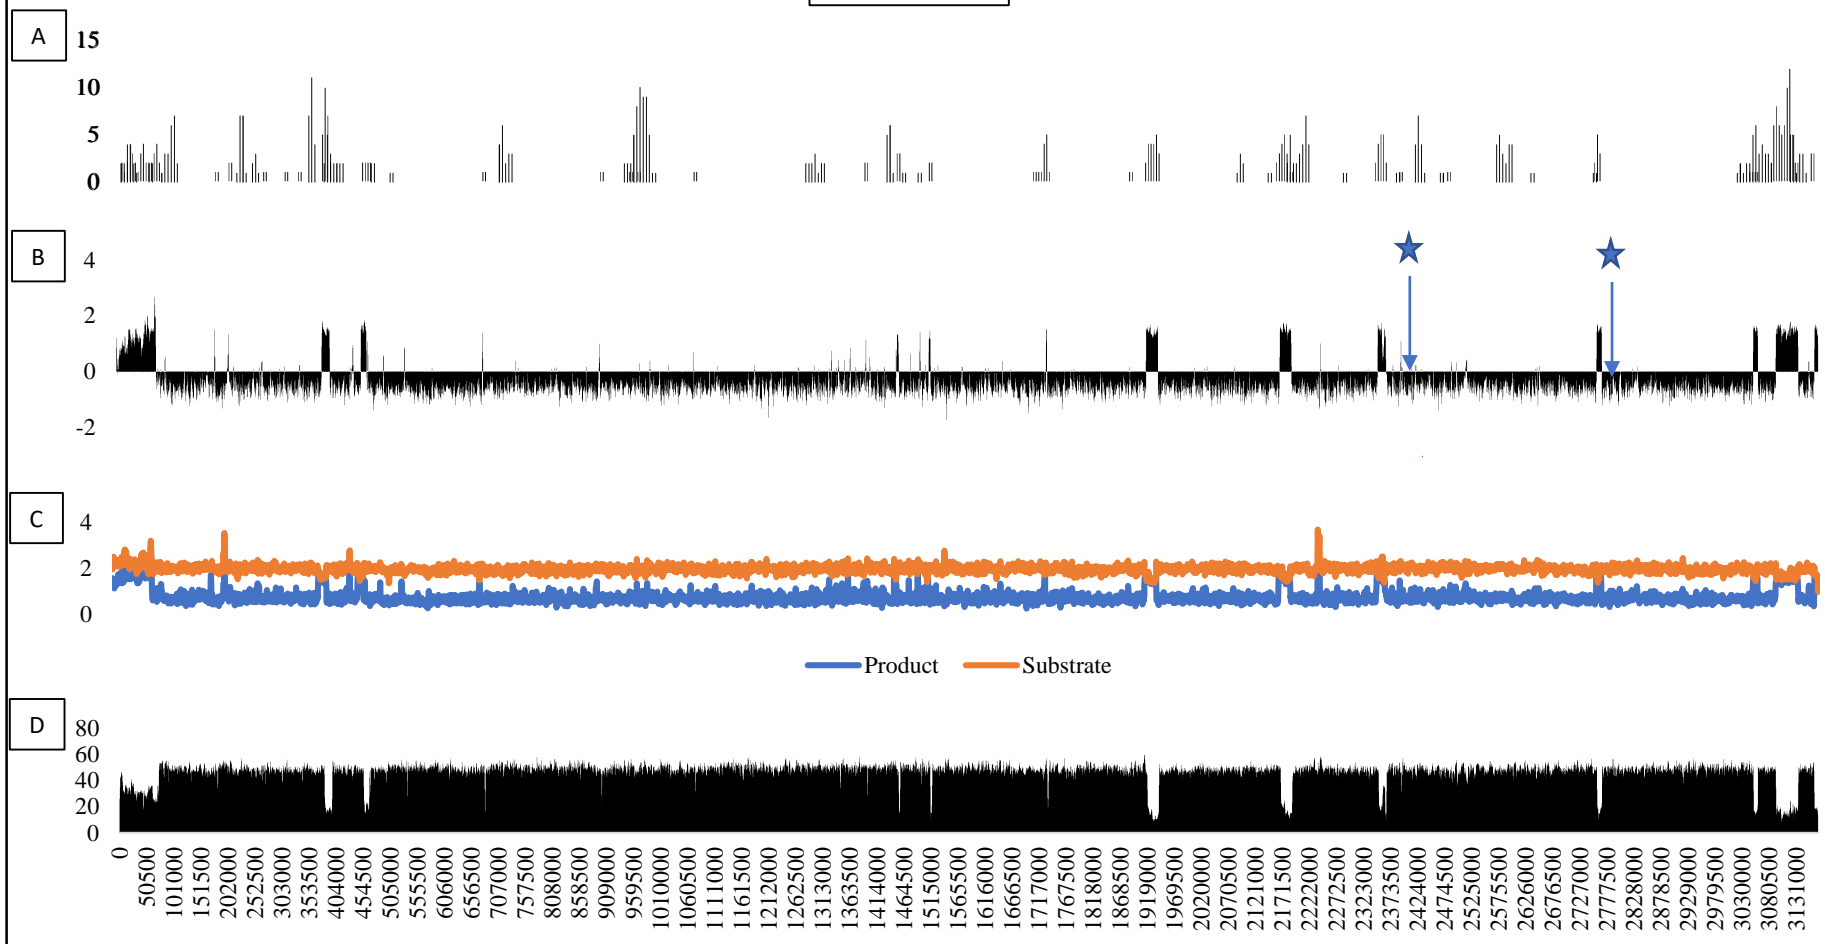

Chromosome 10

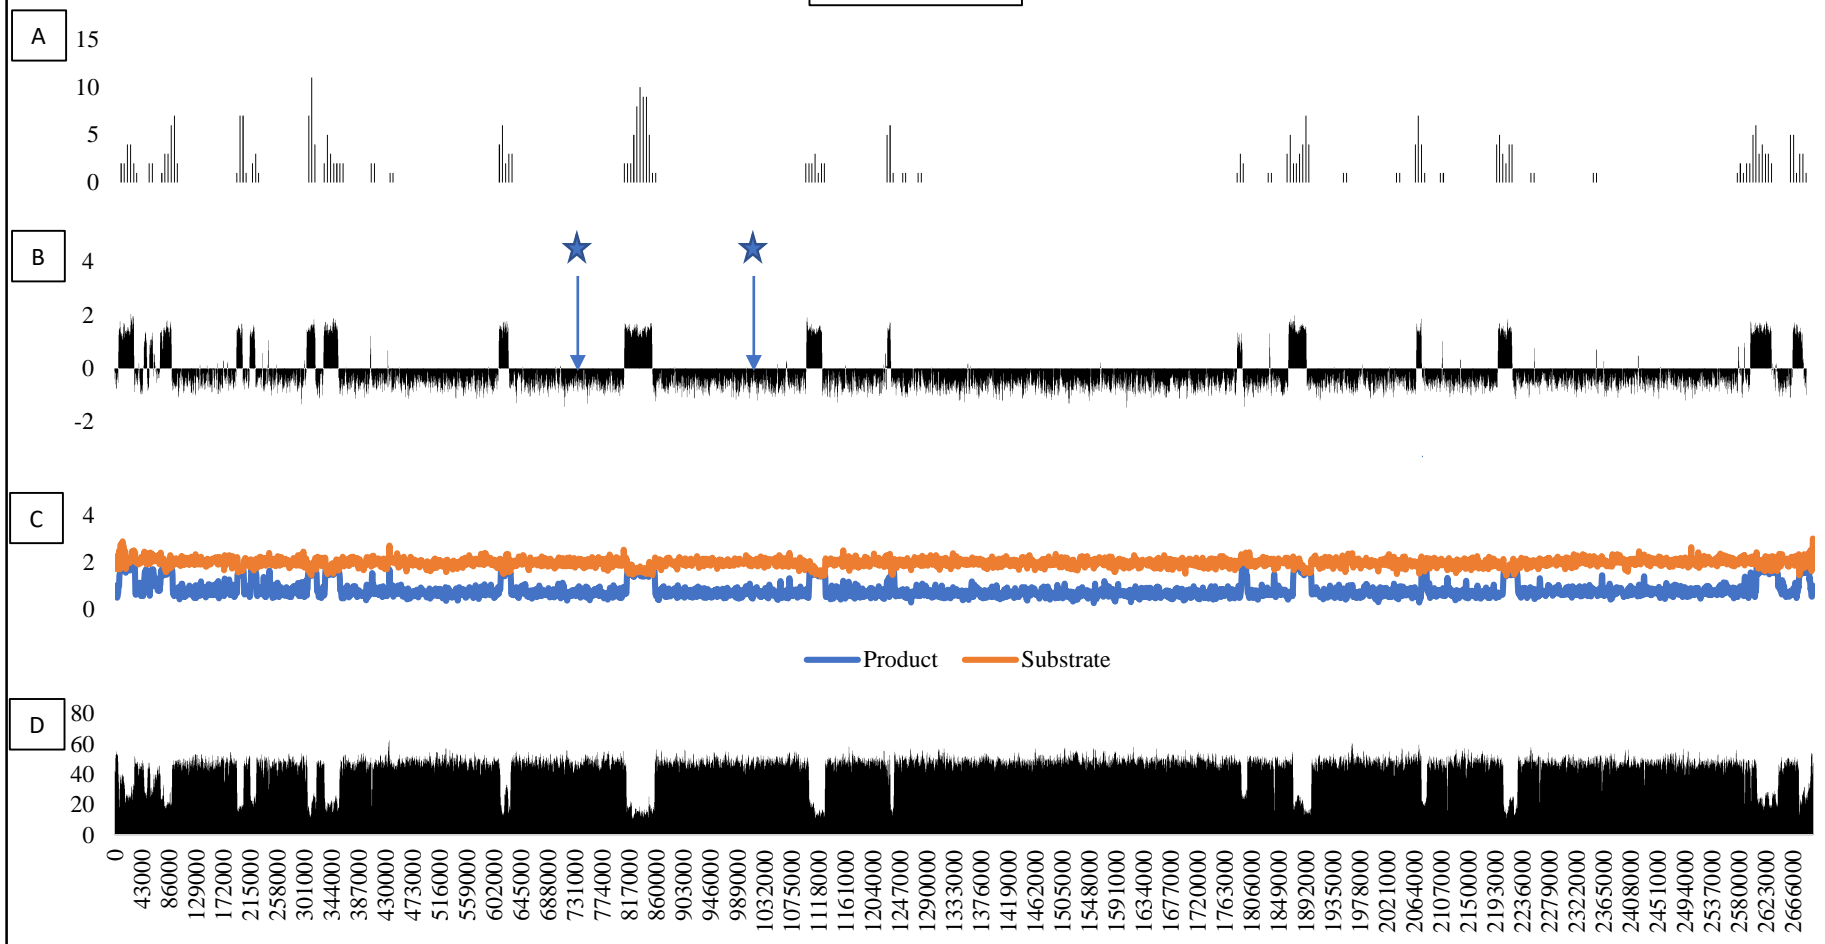

Chromosome 11

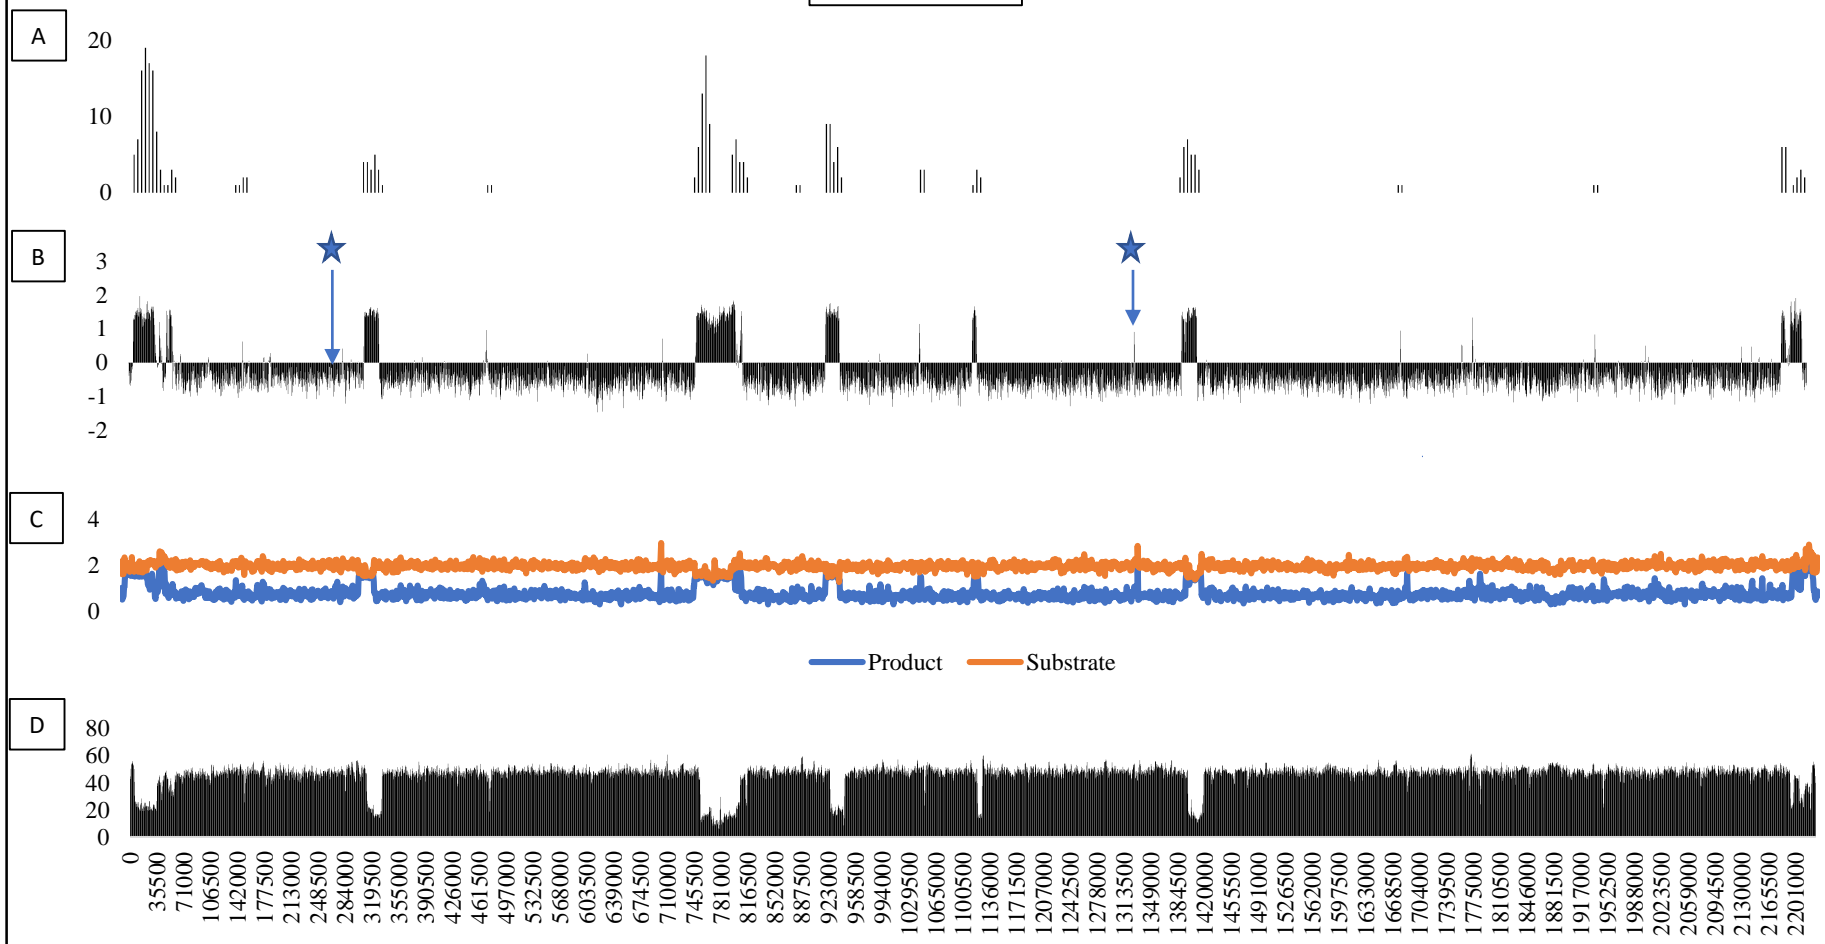

Supplement: Supplementary file 8 [file supplementary]
